# Supplementary material for: A novel immune-related genes prognosis biomarker for hepatocellular carcinoma
Source: publisher site journal article supplement (doi:10.18632/aging.202173), 2020-11-26
Supplement: Supplementary file [file aging-v13i1-202173-supplementary-material-SD1.pdf]

## SUPPLEMENTARY FIGURE

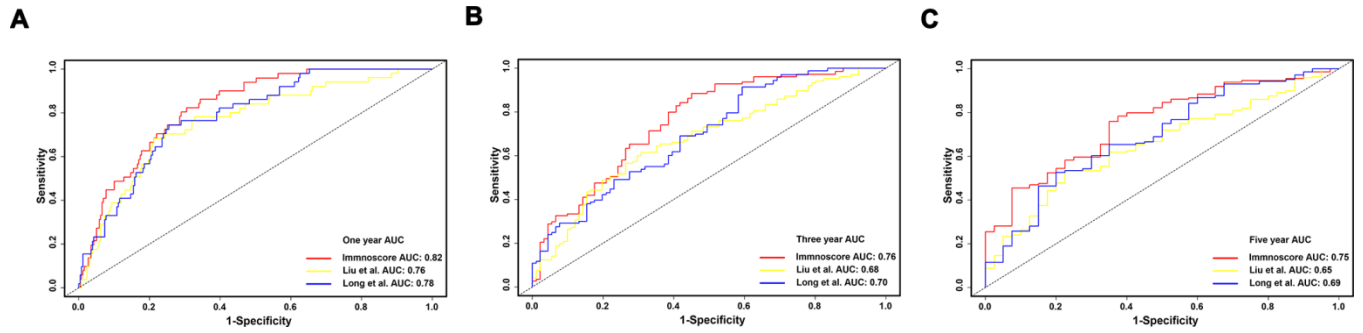

**Supplementary Figure 1. The AUC of the immunoscore for 1-, 3-, and 5-year overall survival predictions compared with other studies. (A) One year AUC; (B) Three year AUC; (C) Five year AUC.**
