# Supplementary material for: A novel immune-related genes prognosis biomarker for hepatocellular carcinoma
Source: Aging (Albany NY). 2020 Nov 26;13(1):675–93. doi: 10.18632/aging.202173 (PMC7834986; doi:10.18632/aging.202173)
Supplement: Supplementary Table 1 [file aging-13-202173-s002.xlsx]

## Sheet: Sheet1
Supplementary Table 1. There were 766 overlapping IRGs identified from three independent cohorts.
ACVR1B
ACVR2A
ACVR2B
ACVRL1
AKT1
AKT2
AKT3
B2M
BCL10
BMP1
BMP2
BMP4
BMP5
BMP6
BMP8A
BMP8B
BMPR1A
BMPR2
C5
C5AR1
CCL11
CCL13
CCL16
CCL17
CCL18
CCL19
CCL2
CCL20
CCL21
CCL23
CCL24
CCL25
CCL4
CCL5
CCL8
CCR1
CCR6
CCR7
CD247
CD4
CD40
CD40LG
CD81
CD8A
CD8B
CHUK
CKLF
CMKLR1
CREB1
CTSG
CTSS
CX3CL1
CX3CR1
CXCL1
CXCL10
CXCL11
CXCL12
CXCL13
CXCL14
CXCL2
CXCL3
CXCL5
CXCL6
CXCL9
CXCR3
CXCR4
CXCR6
CYSLTR1
DEFB1
EDN1
EDNRA
EDNRB
FASLG
FCER1G
FGF2
FOS
FPR1
FYN
GDF11
GDF15
GDF2
GPR17
GRB2
GRN
HAMP
HFE
HGF
HRAS
ICAM1
IFNAR1
IFNAR2
IFNG
IFNGR1
IFNGR2
IKBKB
IKBKG
IL10RA
IL10RB
IL11RA
IL12RB1
IL13RA1
IL13RA2
IL15
IL15RA
IL16
IL17RA
IL17RB
IL17RC
IL18
IL18R1
IL18RAP
IL1B
IL1R1
IL1R2
IL1RAP
IL1RL1
IL1RL2
IL1RN
IL21R
IL22RA1
IL23A
IL24
IL27RA
IL2RA
IL2RB
IL2RG
IL32
IL33
IL4R
IL6
IL6R
IL6ST
IL7
IL7R
INHA
INHBA
INHBB
INHBC
INHBE
JUN
KLRD1
KLRK1
KRAS
LAT
LCK
LCP2
LECT2
LEFTY1
LTB4R
LTB4R2
LTBP1
MALT1
MAP2K1
MAP2K2
MAPK1
MAPK3
MICA
MICB
MIF
NFAT5
NFATC1
NFATC3
NFATC4
NFKB1
NFKBIA
NFKBIB
NFKBIE
NRAS
PAK1
PDCD1
PDGFRA
PDGFRB
PIK3CA
PIK3CB
PIK3CD
PIK3R1
PIK3R2
PIK3R3
PIK3R5
PLAU
PLAUR
PLCG2
PLXNA1
PLXNA2
PLXNA3
PLXNB1
PLXNB2
PLXNB3
PLXNC1
PLXND1
PPARG
PPP3CA
PPP3CB
PPP3CC
PPP3R1
PTAFR
PTGDS
PTK2B
PTPN6
RAC1
RAC2
RAC3
RELA
RNASE2
ROBO1
ROBO3
S100A6
SAA1
SEMA3B
SEMA3C
SEMA3F
SEMA3G
SEMA4A
SEMA4C
SEMA4D
SEMA4F
SEMA4G
SEMA5A
SEMA6A
SEMA6B
SEMA6C
SEMA6D
SEMA7A
SLIT2
SOS1
SOS2
SYK
TGFB1
TGFB2
TGFB3
TGFBR1
TGFBR2
TGFBR3
TNC
TNF
TNFRSF10B
TNFRSF10C
TNFRSF10D
TNFRSF11A
TNFRSF11B
TNFRSF12A
TNFRSF14
TNFRSF17
TNFRSF1A
TNFRSF1B
TNFRSF21
TNFRSF25
TNFRSF4
TNFSF10
TNFSF11
TNFSF12
TNFSF14
TNFSF15
TNFSF4
TNFSF8
TNFSF9
TXLNA
ULBP2
VAV1
VAV2
VAV3
VDR
VEGFA
XCL1
XCL2
ZAP70
ARRB1
F2RL1
GNAI1
MMP9
PSME1
PSME2
A2M
ABCC4
ACTG1
ADAR
ADIPOR1
ADIPOR2
ADM
ADM2
ADRB2
ADRM1
AGER
AGT
AGTR1
AHNAK
ALB
ANGPT1
ANGPTL2
ANGPTL3
ANGPTL4
ANXA6
AP3B1
APOBEC3A
APOBEC3C
APOBEC3F
APOBEC3G
APOD
APOH
APOM
AQP9
AR
ARAF
ARG2
AVPR1A
AZGP1
BACH2
BCL3
BECN1
BID
BIRC5
BLNK
BPHL
BRAF
BRD8
BST2
BTK
C3AR1
C8G
CACYBP
CALCA
CALCRL
CALR
CANX
CASP3
CAT
CBL
CBLB
CBLC
CD14
CD19
CD1C
CD1D
CD1E
CD209
CD244
CD28
CD320
CD3D
CD3E
CD3G
CD48
CD72
CD74
CD79A
CD79B
CD86
CDC42
CDH1
CDK4
CETP
CHIT1
CIITA
CLCF1
CLDN4
CLEC11A
CLEC4M
CMTM6
CMTM8
CNTFR
COLEC10
COLEC12
CRABP2
CRHR1
CRIM1
CRLF1
CRLF3
CRP
CSF1
CSF1R
CSF2RB
CSF3R
CSK
CSRP1
CTF1
CTLA4
CTSB
CTSE
CYBB
CYLD
DAXX
DCK
DDX17
DDX58
DES
DKK1
DMBT1
DUOX1
DUOX2
EBI3
ECD
EED
EGFR
EIF2AK2
ELAVL1
ELN
ENG
EPO
EPOR
ESM1
ESR1
ESRRA
F2R
FABP3
FABP4
FAM3C
FAS
FCGR2B
FCGR3B
FCGRT
FCN2
FGA
FGF13
FGF14
FGF21
FGF23
FGF7
FGFR1
FGFR2
FGFR3
FGFR4
FGR
FLT1
FLT3LG
FLT4
FURIN
GAST
GBP2
GCGR
GHR
GHRHR
GIPR
GMFB
GMFG
GNLY
GNRH1
GPI
GRAP2
GREM1
GREM2
GSK3B
GUCA2A
GZMB
HBEGF
HCK
HDAC1
HDGF
HMGB1
HMOX1
HNF4A
HNF4G
HRG
HSP90AA1
HSP90AB1
HSPA1A
HSPA1B
HSPA1L
HSPA2
HSPA4
HSPA5
HSPA6
HSPA8
ICAM2
ICOS
IFI30
IFIH1
IFITM1
IGF1
IGF1R
IGF2R
IKBKE
ILK
INPP5D
INSR
IRF1
IRF3
IRF5
IRF7
ISG15
ISG20
ISG20L2
ITGAL
ITGAV
ITGB2
ITK
JAG1
JAG2
JAK1
JAK2
JUND
KDR
KITLG
KLKB1
KLRC4
KNG1
LANCL1
LBP
LCN2
LEPR
LGMN
LGR4
LGR5
LIF
LIFR
LIMS1
LPA
LRP1
LTB
LTBP2
LTBP3
LTBP4
LTBR
LYN
MAP3K14
MAP3K8
MAPK14
MAPK8
MAPT
MARCO
MASP1
MASP2
MBL2
MC1R
MCHR1
MDK
MET
MIA
MMP12
MR1
MSR1
MUC4
MX1
MX2
NCK1
NCR3
NDRG1
NEDD4
NENF
NEO1
NFYA
NFYB
NFYC
NGFR
NLRX1
NMB
NOD1
NOD2
NPFF
NPPA
NPR1
NPR3
NR0B2
NR1D2
NR1H2
NR1H3
NR1H4
NR1I2
NR1I3
NR2C1
NR2C2
NR2F1
NR2F2
NR2F6
NR3C1
NR3C2
NR4A1
NR4A2
NR4A3
NR5A2
NR6A1
NRG1
NRP1
NRP2
NRTN
NTF3
NTS
NUDT6
OAS1
OASL
OGFR
OGN
OLR1
ORM1
OSGIN1
OSM
OSMR
OXT
PAEP
PAK2
PAK4
PDGFA
PDGFB
PDGFC
PDGFD
PDGFRL
PDIA2
PDIA3
PDK1
PGC
PGF
PGRMC2
PI3
PLA2G2A
PLSCR1
PMCH
PML
PPARA
PPARD
PPIA
PPP4C
PRDX1
PRDX2
PRF1
PRKCA
PRKCQ
PRLR
PROC
PROCR
PSMB8
PSMC1
PSMC2
PSMC3
PSMC5
PSMC6
PSMD1
PSMD10
PSMD11
PSMD13
PSMD14
PSMD2
PSMD3
PSMD4
PSMD5
PSMD6
PSMD7
PSMD8
PSME3
PTGER2
PTGER4
PTGFR
PTGS2
PTHLH
PTK2
PTN
PTPN11
PTPRC
PTX3
RABEP1
RABEP2
RAF1
RARA
RARB
RARG
RASGRP1
RASGRP3
RBP1
RBP4
REG1A
RELB
RFX5
RFXANK
RFXAP
RHOA
RNASEL
RORA
RORC
RSAD2
RXRA
RXRB
RXRG
S100A1
S100A10
S100A11
S100A12
S100A13
S100A14
S100A2
S100A7
S100A8
S100A9
S100B
S100P
SCTR
SDC1
SDC2
SDC3
SDC4
SECTM1
SERPINA3
SERPIND1
SH2D1A
SH3BP2
SHC1
SHC2
SKIV2L
SLC11A1
SLC22A17
SLC29A3
SLPI
SOCS1
SOCS3
SOD1
SORT1
SP1
SPINK5
SPP1
SRC
SSTR1
SSTR2
STAB2
STAT1
STAT3
STC1
STC2
TANK
TAP1
TAP2
TAPBP
TAPBPL
TBK1
TCF7L2
TEC
TEK
TFR2
TFRC
TGFA
THBS1
THPO
THRA
THRB
TIE1
TINAGL1
TK2
TLR1
TLR2
TLR3
TLR4
TLR8
TMPRSS6
TMSB10
TNFAIP3
TPM2
TPT1
TRAF3
TRIM22
TRIM27
TRIM5
TRPC4AP
TUBB3
TXK
TYK2
TYROBP
UCN
UNC93B1
UTS2
VCAM1
VEGFB
VEGFC
VIM
VIP
VIPR1
VTN
WFDC2
WNT5A
ZC3HAV1
ZYX
