# Supplementary material for: A novel immune-related genes prognosis biomarker for hepatocellular carcinoma
Source: Aging (Albany NY). 2020 Nov 26;13(1):675–93. doi: 10.18632/aging.202173 (PMC7834986; doi:10.18632/aging.202173)
Supplement: Supplementary Table 2 [file aging-13-202173-s003.xlsx]

## Sheet: DEGs
Supplementary Table 2. A total of 272 DEGs identified between the high and low immunoscore group with adjPvalue < 0.05
	logFC	AveExpr	t	P.Value	adj.P.Val	B	Regulated
CYP3A4	-2.70328	11.7767	-6.87993	2.87431e-11	1.3257e-09	15.1772	Down
TAT	-2.42011	13.3849	-7.79422	7.91419e-14	8.71539e-12	20.8846	Down
SLC10A1	-2.40291	11.1144	-9.13542	5.91464e-18	4.83078e-15	30.1157	Down
PCK1	-2.39462	13.4131	-8.75655	9.51899e-17	3.58829e-14	27.4135	Down
CYP2A6	-2.2394	12.1801	-5.97746	5.71109e-09	1.20246e-07	10.077	Down
SLC22A1	-2.2157	11.1612	-7.56192	3.71233e-13	3.27789e-11	19.3862	Down
CYP8B1	-2.06659	11.958	-6.49498	2.93761e-10	9.18391e-09	12.9335	Down
HRG	-2.00403	15.2062	-6.79802	4.75185e-11	1.99029e-09	14.6916	Down
CYP2C8	-1.96297	12.3347	-7.87563	4.57054e-14	5.70648e-12	21.4171	Down
GNMT	-1.96034	10.4108	-8.97467	1.93913e-17	1.08603e-14	28.9607	Down
SPP2	-1.95966	10.6067	-8.13597	7.70023e-15	1.34768e-12	23.1454	Down
HSD17B13	-1.9461	10.036	-6.05903	3.62194e-09	8.12325e-08	10.5147	Down
GLYAT	-1.93362	10.2479	-7.38617	1.17031e-12	8.55989e-11	18.2739	Down
CPS1	-1.93287	14.5213	-6.07678	3.27825e-09	7.46344e-08	10.6106	Down
SLC25A47	-1.92192	10.2202	-6.64593	1.19455e-10	4.30432e-09	13.8016	Down
CYP2C9	-1.90694	12.8442	-7.79101	8.08682e-14	8.80654e-12	20.8637	Down
ADH4	-1.90492	12.8861	-5.8693	1.03708e-08	2.02681e-07	9.50403	Down
ALDOB	-1.88857	16.1864	-7.37589	1.25082e-12	9.04744e-11	18.2095	Down
HPD	-1.87747	13.9561	-5.67251	3.005e-08	5.08671e-07	8.48352	Down
BHMT	-1.85424	12.3408	-6.98148	1.53202e-11	7.66428e-10	15.7854	Down
G6PC	-1.83553	13.5145	-8.61273	2.68245e-16	8.61991e-14	26.4064	Down
AFM	-1.74905	11.8229	-8.44614	8.78828e-16	2.24219e-13	25.2533	Down
CYP4A11	-1.74878	12.8139	-8.11429	8.94374e-15	1.47324e-12	23.0001	Down
GCGR	-1.72881	9.07858	-6.82936	3.92236e-11	1.69726e-09	14.8769	Down
ADH1B	-1.7192	14.7372	-6.4659	3.48752e-10	1.06318e-08	12.7681	Down
LECT2	-1.70391	10.5607	-6.91123	2.36936e-11	1.10581e-09	15.3639	Down
SLC27A5	-1.69974	13.2129	-7.7574	1.01325e-13	1.05089e-11	20.645	Down
HSD17B6	-1.69837	13.3646	-7.94762	2.80368e-14	3.98245e-12	21.8912	Down
TTC36	-1.68516	8.10771	-8.38992	1.30748e-15	3.08785e-13	24.8673	Down
IGF2	-1.68103	12.4069	-4.02917	6.90522e-05	0.000411918	1.13727	Down
CYP2A7	-1.66587	8.6103	-5.64017	3.56953e-08	5.96505e-07	8.31855	Down
SERPINC1	-1.6631	16.0728	-6.66517	1.064e-10	3.8984e-09	13.9133	Down
HGFAC	-1.65128	9.91199	-5.57272	5.09914e-08	8.06076e-07	7.97695	Down
PDK4	-1.63961	11.6962	-9.66109	1.11957e-19	1.46305e-16	33.9768	Down
GLYATL1	-1.63419	11.0362	-8.58594	3.24958e-16	1.01108e-13	26.22	Down
GYS2	-1.61596	9.82545	-7.33699	1.60832e-12	1.12594e-10	17.9661	Down
FNDC5	-1.60646	8.83038	-6.84719	3.5158e-11	1.56353e-09	14.9826	Down
F9	-1.60221	11.9458	-6.2818	1.01991e-09	2.68713e-08	11.7341	Down
SLC22A7	-1.6007	12.4414	-6.07392	3.33152e-09	7.57592e-08	10.5951	Down
CYP7A1	-1.60028	10.2301	-5.82779	1.30099e-08	2.47112e-07	9.28642	Down
SDS	-1.5839	12.0191	-4.59202	6.18285e-06	5.11161e-05	3.40782	Down
AQP9	-1.56977	12.8521	-5.72354	2.28663e-08	4.03806e-07	8.74542	Down
CFHR4	-1.56322	9.80033	-7.5452	4.14418e-13	3.59444e-11	19.2796	Down
PON1	-1.55648	12.8563	-6.92185	2.21857e-11	1.04791e-09	15.4275	Down
AKR1D1	-1.55537	10.2003	-6.7241	7.452e-11	2.90922e-09	14.2571	Down
CYP4A22	-1.54593	10.9658	-7.78013	8.69972e-14	9.42165e-12	20.7928	Down
ADH1C	-1.54571	12.8169	-5.21608	3.17727e-07	4.05211e-06	6.22825	Down
C7	-1.54305	9.9461	-6.02915	4.2818e-09	9.40941e-08	10.3538	Down
HAO2	-1.54055	9.52708	-6.12042	2.56315e-09	6.03157e-08	10.8472	Down
UPB1	-1.50913	12.2801	-7.39067	1.13664e-12	8.34474e-11	18.3022	Down
RDH16	-1.5025	11.6178	-6.18116	1.81576e-09	4.46581e-08	11.1789	Down
DNASE1L3	-1.50117	8.96046	-10.6664	4.0936e-23	2.67476e-19	41.6859	Down
APOA1	-1.50065	17.2251	-5.60076	4.39842e-08	7.10197e-07	8.11852	Down
ANO1	-1.49909	10.5168	-7.92337	3.30651e-14	4.46994e-12	21.7312	Down
ANXA10	-1.49182	8.75378	-8.95739	2.20154e-17	1.17359e-14	28.8372	Down
CFHR3	-1.48303	10.878	-6.02434	4.39859e-09	9.63365e-08	10.328	Down
TTR	-1.48091	15.5122	-6.08985	3.04586e-09	7.04899e-08	10.6813	Down
HPX	-1.4703	15.9109	-7.04571	1.02552e-11	5.5685e-10	16.1735	Down
KNG1	-1.46288	16.1166	-7.39969	1.07207e-12	7.99039e-11	18.3589	Down
GPLD1	-1.4564	9.60451	-7.71261	1.36705e-13	1.39567e-11	20.3546	Down
FTCD	-1.45367	13.0579	-6.98141	1.5327e-11	7.66428e-10	15.7849	Down
AGXT	-1.45363	14.9558	-6.47827	3.24239e-10	1.00248e-08	12.8384	Down
OTC	-1.44541	11.2516	-6.59151	1.65521e-10	5.66237e-09	13.4869	Down
CYP2B6	-1.44162	10.9499	-6.42197	4.5147e-10	1.32085e-08	12.5193	Down
SLC13A5	-1.41954	12.4681	-5.65896	3.23018e-08	5.43502e-07	8.41427	Down
C6	-1.4168	12.6006	-6.75423	6.20579e-11	2.50816e-09	14.4338	Down
HSD11B1	-1.4164	11.76	-4.54592	7.60627e-06	6.10558e-05	3.21194	Down
ELFN1	-1.41336	8.88076	-7.9433	2.88725e-14	4.02068e-12	21.8627	Down
ACSM2A	-1.40756	12.3164	-6.58966	1.67366e-10	5.70557e-09	13.4762	Down
APOC3	-1.40601	16.5448	-5.92093	7.80877e-09	1.59114e-07	9.7765	Down
SLC2A2	-1.40525	13.3834	-7.22811	3.23452e-12	2.07879e-10	17.2898	Down
APOA5	-1.40259	12.4077	-6.41209	4.78377e-10	1.38921e-08	12.4635	Down
MFSD2A	-1.39873	9.19611	-5.61019	4.18442e-08	6.80688e-07	8.16629	Down
FBP1	-1.38173	12.6707	-7.4807	6.32545e-13	5.17305e-11	18.8699	Down
APOF	-1.38039	10.3245	-5.99185	5.27193e-09	1.12327e-07	10.1539	Down
NR1I3	-1.37676	10.66	-7.09908	7.33275e-12	4.14226e-10	16.4979	Down
UROC1	-1.37333	9.33696	-5.2745	2.36985e-07	3.09693e-06	6.50804	Down
SULT2A1	-1.36537	13.4849	-5.46918	8.75807e-08	1.28308e-06	7.45928	Down
CYP2E1	-1.36534	14.0761	-3.24037	0.00131129	0.00511114	-1.58663	Down
SLC38A4	-1.36065	12.8902	-7.42786	8.92787e-13	6.89632e-11	18.5361	Down
CYP1A2	-1.36007	8.37637	-4.41723	1.34425e-05	9.98864e-05	2.67439	Down
SEC14L2	-1.35631	11.93	-7.49587	5.72779e-13	4.7561e-11	18.966	Down
CDO1	-1.35448	12.335	-7.12607	6.18423e-12	3.58648e-10	16.6626	Down
MOGAT2	-1.35008	9.13707	-6.01348	4.67348e-09	1.01338e-07	10.2697	Down
SLC6A1	-1.34669	11.8156	-7.81113	7.06325e-14	7.95711e-12	20.9949	Down
IYD	-1.33961	9.24408	-8.56052	3.89697e-16	1.1574e-13	26.0435	Down
RTP3	-1.33348	9.547	-6.43127	4.27519e-10	1.25829e-08	12.5718	Down
PPARGC1A	-1.3297	10.4749	-7.37366	1.26906e-12	9.1456e-11	18.1955	Down
SLCO1B1	-1.32059	11.7457	-7.1546	5.16251e-12	3.05726e-10	16.8373	Down
UGT2B15	-1.32049	12.5569	-5.26665	2.46545e-07	3.20264e-06	6.47029	Down
HJV	-1.31318	12.4632	-6.06327	3.5369e-09	7.95073e-08	10.5376	Down
CYP4F2	-1.29834	11.2378	-6.03984	4.03338e-09	8.9336e-08	10.4113	Down
ESR1	-1.29717	7.92042	-8.64016	2.20323e-16	7.31994e-14	26.5977	Down
CFHR5	-1.29359	11.4011	-4.8547	1.8389e-06	1.82975e-05	4.55705	Down
F12	-1.28068	13.8043	-6.3806	5.75052e-10	1.63128e-08	12.2861	Down
LCAT	-1.27609	10.4053	-7.79119	8.0768e-14	8.80654e-12	20.8649	Down
FMO3	-1.27451	13.0299	-5.89824	8.84804e-09	1.76798e-07	9.6565	Down
ABCA8	-1.2742	9.31758	-7.02184	1.19089e-11	6.25838e-10	16.0289	Down
PLG	-1.27257	15.0504	-6.0313	4.23081e-09	9.30778e-08	10.3654	Down
PGLYRP2	-1.26697	11.5485	-5.44168	1.00974e-07	1.45322e-06	7.32318	Down
AZGP1	-1.2627	14.4164	-6.53207	2.35831e-10	7.70459e-09	13.1454	Down
A1BG	-1.25877	11.369	-6.59573	1.61401e-10	5.57003e-09	13.5112	Down
HMGCS2	-1.25301	15.1164	-6.7033	8.45231e-11	3.23598e-09	14.1355	Down
NR1I2	-1.25141	9.77997	-6.46109	3.58781e-10	1.08197e-08	12.7408	Down
IGFALS	-1.2291	8.81012	-5.85098	1.14636e-08	2.21825e-07	9.40786	Down
KLKB1	-1.22716	11.4645	-8.71624	1.27401e-16	4.38124e-14	27.1302	Down
HPR	-1.21735	12.7607	-5.14045	4.62628e-07	5.58057e-06	5.86998	Down
EHHADH	-1.21396	12.6535	-7.91903	3.40528e-14	4.54084e-12	21.7026	Down
AKR7A3	-1.21311	10.6594	-5.66263	3.16763e-08	5.33436e-07	8.43301	Down
RBP4	-1.21215	17.2351	-6.57775	1.79695e-10	6.08414e-09	13.4076	Down
SERPINA4	-1.21165	12.7119	-6.12816	2.45338e-09	5.8081e-08	10.8894	Down
PPP1R1A	-1.21081	10.5321	-5.28438	2.25472e-07	2.96425e-06	6.55559	Down
HAO1	-1.2084	12.3555	-6.46515	3.50305e-10	1.06625e-08	12.7638	Down
ITIH1	-1.20452	15.5948	-6.36233	6.39647e-10	1.78355e-08	12.1835	Down
CES2	-1.20395	14.0333	-6.98482	1.50047e-11	7.56485e-10	15.8055	Down
ASPDH	-1.20306	10.0933	-6.0154	4.62369e-09	1.00481e-07	10.28	Down
ABCB11	-1.19858	9.53873	-5.55597	5.56847e-08	8.7183e-07	7.89265	Down
HP	-1.19207	17.2008	-4.37067	1.64642e-05	0.000118692	2.48328	Down
ACSM2B	-1.19102	12.8393	-5.79613	1.54533e-08	2.8631e-07	9.12126	Down
FETUB	-1.18966	10.8056	-4.84696	1.90724e-06	1.88436e-05	4.5224	Down
ANGPTL3	-1.18914	13.2476	-6.36419	6.32751e-10	1.76936e-08	12.194	Down
PAH	-1.18759	14.4104	-6.6015	1.55929e-10	5.40465e-09	13.5445	Down
PON3	-1.18448	12.0649	-8.1417	7.40074e-15	1.30693e-12	23.1839	Down
TMPRSS6	-1.18146	12.6549	-6.60647	1.5136e-10	5.26991e-09	13.5731	Down
SLC1A2	-1.17935	10.0747	-4.65608	4.62296e-06	3.97802e-05	3.68294	Down
ABCA6	-1.17565	11.0908	-7.10099	7.2449e-12	4.10447e-10	16.5095	Down
ANGPTL4	-1.16245	11.8444	-6.44208	4.01226e-10	1.19164e-08	12.633	Down
ADH1A	-1.16019	13.2159	-5.00106	9.14074e-07	1.00435e-05	5.22148	Down
GSTM1	-1.15886	8.27225	-3.72581	0.000227785	0.00114011	0.0251337	Down
FABP4	-1.15622	8.17612	-7.01258	1.26182e-11	6.56079e-10	15.973	Down
CUX2	-1.15564	9.98462	-5.90802	8.38435e-09	1.68564e-07	9.70819	Down
ALDH6A1	-1.15094	12.6377	-8.06612	1.2463e-14	1.90859e-12	22.678	Down
F13B	-1.1494	11.7984	-6.52391	2.47528e-10	8.00668e-09	13.0987	Down
RGN	-1.14761	12.2103	-7.76136	9.86703e-14	1.04548e-11	20.6707	Down
SLCO2A1	-1.14613	8.8122	-8.07871	1.14295e-14	1.79232e-12	22.762	Down
C4BPA	-1.14341	14.7702	-5.31162	1.96444e-07	2.62846e-06	6.68718	Down
APOH	-1.13961	16.9131	-5.50873	7.12964e-08	1.0701e-06	7.6561	Down
DMGDH	-1.13945	11.3399	-6.96726	1.6738e-11	8.26443e-10	15.6998	Down
MASP2	-1.13877	12.2991	-5.04646	7.33432e-07	8.29587e-06	5.43102	Down
CYP2D6	-1.13655	12.4099	-5.2632	2.50863e-07	3.25656e-06	6.45372	Down
OGDHL	-1.13578	11.1728	-5.63018	3.76394e-08	6.2105e-07	8.26774	Down
XDH	-1.13151	10.658	-6.15256	2.13643e-09	5.14475e-08	11.0224	Down
PCK2	-1.12964	13.6543	-7.64823	2.09825e-13	2.01617e-11	19.9392	Down
SOCS2	-1.12796	9.12228	-9.0531	1.08811e-17	7.10969e-15	29.5227	Down
AHSG	-1.12709	16.0701	-4.14076	4.36764e-05	0.000277879	1.56625	Down
LPA	-1.12327	9.44759	-6.61154	1.46831e-10	5.13961e-09	13.6025	Down
ABAT	-1.12206	13.0361	-6.92632	2.15806e-11	1.02427e-09	15.4542	Down
CES3	-1.12194	10.0611	-7.08958	7.78473e-12	4.38495e-10	16.44	Down
DAO	-1.12096	10.5696	-6.1272	2.46675e-09	5.83271e-08	10.8841	Down
SORD	-1.12075	12.6106	-8.12701	8.19215e-15	1.39637e-12	23.0853	Down
ABCB4	-1.12021	11.6795	-5.62818	3.80411e-08	6.26561e-07	8.25757	Down
AR	-1.12012	11.1126	-5.84257	1.20028e-08	2.30215e-07	9.36374	Down
ACOT12	-1.11981	10.0038	-6.32008	8.17478e-10	2.21635e-08	11.9472	Down
C8B	-1.11882	13.2583	-6.47582	3.28944e-10	1.01383e-08	12.8245	Down
DPYS	-1.1168	12.6074	-5.23924	2.82954e-07	3.65139e-06	6.33884	Down
INSIG1	-1.11653	13.834	-6.31442	8.44741e-10	2.2808e-08	11.9156	Down
ETNPPL	-1.113	10.504	-5.02886	7.98935e-07	8.93877e-06	5.3496	Down
AASS	-1.11094	8.97095	-6.61739	1.41774e-10	4.98932e-09	13.6363	Down
FAXDC2	-1.11085	11.3726	-9.07034	9.57989e-18	6.70661e-15	29.6466	Down
SRD5A2	-1.09667	8.68042	-5.32202	1.86354e-07	2.5145e-06	6.73754	Down
FBLN5	-1.08876	9.56506	-7.33924	1.58516e-12	1.1137e-10	17.9801	Down
UGT1A4	-1.08623	9.71778	-3.98051	8.40527e-05	0.000486592	0.953509	Down
TMEM220	-1.08474	10.4702	-9.77591	4.63032e-20	7.56363e-17	34.8365	Down
C8A	-1.08392	12.5536	-5.63663	3.63743e-08	6.05328e-07	8.3005	Down
GHR	-1.08378	10.5655	-6.91448	2.32209e-11	1.08634e-09	15.3834	Down
ASPG	-1.08253	9.03491	-4.42282	1.31174e-05	9.79432e-05	2.69747	Down
AADAC	-1.08197	12.9022	-5.93254	7.32437e-09	1.50342e-07	9.838	Down
CYP4F3	-1.08116	12.609	-6.97336	1.61146e-11	8.01724e-10	15.7365	Down
FXYD1	-1.08037	8.70859	-5.34888	1.62558e-07	2.23142e-06	6.86803	Down
CCL16	-1.07943	11.0392	-4.64221	4.92482e-06	4.19358e-05	3.62306	Down
GADD45B	-1.07843	11.9267	-8.18265	5.57305e-15	1.01151e-12	23.4593	Down
ALB	-1.07596	20.4808	-5.10905	5.40033e-07	6.38464e-06	5.72255	Down
PIPOX	-1.07404	13.313	-6.5315	2.3662e-10	7.7175e-09	13.1421	Down
F11	-1.07273	10.9793	-7.66851	1.83387e-13	1.78844e-11	20.0698	Down
CHRNA4	-1.0724	7.84605	-4.48212	1.0104e-05	7.84393e-05	2.94373	Down
ZG16	-1.07191	8.4155	-6.26474	1.12519e-09	2.92909e-08	11.6395	Down
MAT1A	-1.06937	14.6534	-6.0319	4.21645e-09	9.2866e-08	10.3686	Down
SLC27A2	-1.06906	12.1025	-6.20581	1.57752e-09	3.94421e-08	11.3143	Down
ALDH8A1	-1.06844	11.2466	-6.27156	1.08187e-09	2.83894e-08	11.6773	Down
UGT2B10	-1.06809	11.9961	-4.40264	1.43273e-05	0.000105224	2.61429	Down
SERPINA7	-1.06585	12.1759	-4.05593	6.1927e-05	0.000375354	1.23916	Down
RBP5	-1.06464	11.5138	-6.30933	8.69954e-10	2.34565e-08	11.8873	Down
CLEC3B	-1.06371	8.45256	-9.64604	1.25635e-19	1.53919e-16	33.8646	Down
CTH	-1.06239	10.5431	-5.33949	1.70522e-07	2.32932e-06	6.82234	Down
BTNL9	-1.06058	8.41528	-9.62788	1.44376e-19	1.66473e-16	33.7292	Down
GSTA1	-1.05867	13.5743	-3.94703	9.61142e-05	0.00054436	0.828286	Down
IGSF23	-1.05841	8.87818	-6.17529	1.87743e-09	4.60017e-08	11.1468	Down
CLDN14	-1.05646	9.66723	-8.0607	1.29363e-14	1.96571e-12	22.6418	Down
PPP1R3G	-1.05576	9.09317	-5.17898	3.82239e-07	4.71532e-06	6.05195	Down
SLC38A3	-1.05097	14.1252	-5.70725	2.49562e-08	4.33187e-07	8.66157	Down
ACSM5	-1.04966	10.9592	-4.75884	2.88044e-06	2.66961e-05	4.1312	Down
ANG	-1.04965	13.5063	-5.95611	6.42915e-09	1.33784e-07	9.96323	Down
BDH1	-1.04854	12.4365	-6.79277	4.90677e-11	2.03346e-09	14.6606	Down
STEAP4	-1.0485	8.66713	-7.06607	9.02544e-12	4.96957e-10	16.297	Down
EPHX2	-1.04814	11.9234	-8.11717	8.7682e-15	1.45656e-12	23.0193	Down
ECM2	-1.04477	9.73949	-8.12702	8.19139e-15	1.39637e-12	23.0854	Down
GFRA1	-1.04352	9.58477	-4.74403	3.08534e-06	2.83008e-05	4.06604	Down
CYP3A5	-1.04199	12.8206	-6.04399	3.94077e-09	8.73834e-08	10.4336	Down
TMEM82	-1.03981	8.7059	-5.7018	2.56954e-08	4.44164e-07	8.63358	Down
CNDP1	-1.03787	7.35388	-5.44832	9.75682e-08	1.40834e-06	7.35599	Down
PHYHD1	-1.0364	9.11952	-5.77666	1.71722e-08	3.12543e-07	9.02008	Down
CD5L	-1.0346	7.9698	-5.32198	1.86387e-07	2.5145e-06	6.73737	Down
THRSP	-1.03429	8.97978	-3.5049	0.000517739	0.00228781	-0.734249	Down
SARDH	-1.03426	11.8113	-7.70447	1.44332e-13	1.45087e-11	20.3019	Down
RAMP3	-1.02991	9.0283	-9.09399	8.04155e-18	6.06271e-15	29.8169	Down
TDO2	-1.02976	11.8416	-4.04944	6.35877e-05	0.000384239	1.2144	Down
SLC17A2	-1.0297	10.0767	-5.88728	9.39715e-09	1.86552e-07	9.59869	Down
GLS2	-1.02771	7.55718	-5.63661	3.63777e-08	6.05328e-07	8.30041	Down
SORBS2	-1.02582	11.6671	-9.08706	8.46523e-18	6.14576e-15	29.7669	Down
BAAT	-1.02237	14.2734	-5.94103	6.98847e-09	1.4435e-07	9.8831	Down
ETNK2	-1.01992	11.9526	-5.53053	6.36247e-08	9.78358e-07	7.76505	Down
RIDA	-1.01793	13.1199	-7.2032	3.79115e-12	2.38186e-10	17.1361	Down
MT1X	-1.01605	11.0662	-4.02261	7.09158e-05	0.000420984	1.11236	Down
GPT2	-1.01331	12.4225	-5.9178	7.94473e-09	1.61214e-07	9.75992	Down
ABCG8	-1.01176	10.8973	-5.83053	1.28175e-08	2.44167e-07	9.30072	Down
SLC51A	-1.01169	10.9789	-4.74295	3.10081e-06	2.84028e-05	4.0613	Down
CPB2	-1.00917	14.0455	-6.61475	1.44039e-10	5.05994e-09	13.621	Down
NUGGC	-1.00882	8.86381	-6.36573	6.27111e-10	1.75609e-08	12.2026	Down
ALDH5A1	-1.00866	12.176	-9.82007	3.29206e-20	6.88517e-17	35.1686	Down
PFKFB1	-1.00737	9.08399	-6.23546	1.33129e-09	3.39792e-08	11.4776	Down
GADD45G	-1.00496	10.9313	-6.37525	5.93275e-10	1.67812e-08	12.256	Down
AMDHD1	-1.00491	10.9892	-6.40367	5.02547e-10	1.44442e-08	12.416	Down
HOMER2	-1.0044	10.7212	-7.35931	1.39245e-12	9.92537e-11	18.1057	Down
DCXR	-1.00188	14.0031	-5.56929	5.19198e-08	8.18771e-07	7.95968	Down
GATM	-1.00076	14.8268	-6.51389	2.6267e-10	8.41105e-09	13.0414	Down
SPP1	3.08341	12.1387	9.81169	3.51248e-20	6.88517e-17	35.1055	Up
SPINK1	1.70361	11.1813	4.67248	4.28919e-06	3.72832e-05	3.7539	Up
MYBL2	1.47327	9.27136	9.48044	4.43895e-19	4.35061e-16	32.6358	Up
CA9	1.45774	6.9903	7.31854	1.81141e-12	1.24151e-10	17.851	Up
GCNT3	1.43888	7.5902	9.71055	7.65904e-20	1.07237e-16	34.3464	Up
AKR1B10	1.42635	12.4056	3.97818	8.48404e-05	0.000489994	0.944796	Up
G6PD	1.35472	10.2184	10.4688	2.0007e-22	9.80441e-19	40.1398	Up
NQO1	1.33654	10.4997	4.41542	1.35496e-05	0.000100415	2.66691	Up
ETV4	1.31821	8.87934	6.69661	8.801e-11	3.33045e-09	14.0964	Up
TRNP1	1.2905	8.8859	7.28435	2.25668e-12	1.50974e-10	17.6382	Up
CPLX2	1.27731	8.17004	4.0622	6.03624e-05	0.000367007	1.26312	Up
CD24	1.2639	11.1954	4.98396	9.9271e-07	1.07926e-05	5.14296	Up
CDC20	1.22996	9.23406	9.05617	1.06374e-17	7.10969e-15	29.5447	Up
SLC6A8	1.22139	9.23508	6.68526	9.42567e-11	3.53273e-09	14.0302	Up
SLC38A1	1.19037	10.0562	7.24137	2.97183e-12	1.93534e-10	17.3717	Up
SLC7A11	1.18985	7.7385	7.76772	9.45503e-14	1.01277e-11	20.7121	Up
EPS8L3	1.18823	8.6982	5.91325	8.14615e-09	1.64619e-07	9.73587	Up
AFP	1.18056	9.85357	3.29273	0.00109612	0.00437599	-1.4229	Up
BIRC5	1.16668	9.63459	8.71675	1.26928e-16	4.38124e-14	27.1338	Up
PKM	1.16399	12.1178	8.27348	2.96065e-15	6.22597e-13	24.0735	Up
IGSF3	1.13808	8.92592	7.8797	4.44619e-14	5.58681e-12	21.4439	Up
AGR2	1.13341	6.82708	5.17052	3.98627e-07	4.88368e-06	6.01192	Up
PYCR1	1.12362	8.87462	5.69534	2.66e-08	4.57782e-07	8.60042	Up
SPHK1	1.12224	8.61727	5.9841	5.50415e-09	1.16514e-07	10.1125	Up
S100P	1.11086	8.49465	3.88886	0.000121067	0.000664377	0.612993	Up
EPO	1.10807	6.67943	7.39781	1.08522e-12	8.05775e-11	18.347	Up
SLC1A5	1.09795	9.49431	7.8046	7.38067e-14	8.26719e-12	20.9523	Up
KIF2C	1.09405	8.58329	9.60686	1.69552e-19	1.84642e-16	33.5727	Up
AP1M2	1.09355	7.98835	4.63847	5.00936e-06	4.24896e-05	3.60695	Up
FCGBP	1.09028	8.29203	7.4065	1.02571e-12	7.70346e-11	18.4017	Up
EGLN3	1.08027	8.13448	7.15791	5.05542e-12	3.01205e-10	16.8576	Up
LPCAT1	1.06506	10.4512	9.95229	1.17977e-20	2.89074e-17	36.168	Up
SULT1C2	1.06173	8.6574	5.0789	6.26065e-07	7.24447e-06	5.58174	Up
GNAZ	1.04387	8.61736	6.7697	5.64802e-11	2.29694e-09	14.5247	Up
S100A9	1.04124	8.62314	6.21223	1.52073e-09	3.83648e-08	11.3496	Up
NRCAM	1.0401	7.74854	5.20319	3.38835e-07	4.27403e-06	6.1669	Up
RAP1GAP	1.03971	10.5553	7.21703	3.47131e-12	2.20209e-10	17.2214	Up
PLPP2	1.0395	8.4566	4.40832	1.39764e-05	0.000103072	2.63766	Up
SLC29A4	1.03643	8.77021	5.11475	5.25095e-07	6.2338e-06	5.74928	Up
PKIB	1.02563	7.86234	6.66581	1.05987e-10	3.89055e-09	13.917	Up
PLK1	1.02451	8.76912	8.83	5.58556e-17	2.45818e-14	27.9318	Up
SLC16A3	1.01832	9.30908	7.43746	8.38688e-13	6.54979e-11	18.5966	Up
PNCK	1.01529	6.24581	6.87766	2.91482e-11	1.33496e-09	15.1637	Up
TESC	1.01417	8.88736	4.97585	1.03226e-06	1.113e-05	5.10581	Up
MSC	1.00907	8.09387	5.33692	1.72764e-07	2.35666e-06	6.80987	Up
KIF4A	1.00841	8.74269	8.77616	8.25831e-17	3.27733e-14	27.5516	Up
DUSP9	1.00073	8.76625	4.98797	9.73727e-07	1.06039e-05	5.16133	Up
