# Supplementary material for: A novel immune-related genes prognosis biomarker for hepatocellular carcinoma
Source: Aging (Albany NY). 2020 Nov 26;13(1):675–93. doi: 10.18632/aging.202173 (PMC7834986; doi:10.18632/aging.202173)
Supplement: Supplementary Table 3 [file aging-13-202173-s004.xlsx]

## Sheet: KEGG
Category	Term	Count	%	PValue	Genes	List Total	Pop Hits	Pop Total	Fold Enrichment	Bonferroni	Benjamini	FDR
KEGG_PATHWAY	hsa00982:Drug metabolism	18	6.94981	2.57992e-13	GSTA1, CYP3A4, CYP3A5, CYP2C9, CYP2B6, CYP2C8, CYP2D6, ADH1C, ADH1B, ADH1A, CYP2E1, CYP1A2, GSTM1, ADH4, FMO3, UGT1A4, CYP2A6, CYP2A7, UGT2B10, UGT2B15	140	62	5085	10.5449	2.60596e-11	2.60596e-11	2.86915e-10
KEGG_PATHWAY	hsa00830:Retinol metabolism	16	6.17761	5.7996e-12	CYP3A4, CYP3A5, CYP2C9, CYP2B6, CYP2C8, ADH1C, ADH1B, ADH1A, CYP1A2, CYP4A11, CYP4A22, ADH4, UGT1A4, CYP2A6, CYP2A7, UGT2B10, UGT2B15, RDH16	140	54	5085	10.7619	5.85758e-10	2.92879e-10	6.44922e-09
KEGG_PATHWAY	hsa04610:Complement and coagulation cascades	15	5.79151	2.88437e-09	F11, KNG1, F12, C7, MASP2, C6, F9, C4BPA, PLG, F13B, C8A, C8B, KLKB1, SERPINC1, CPB2	140	69	5085	7.89596	2.91321e-07	9.71071e-08	3.20746e-06
KEGG_PATHWAY	hsa03320:PPAR signaling pathway	15	5.79151	2.88437e-09	EHHADH, PCK2, PCK1, CYP4A11, APOA1, CYP4A22, HMGCS2, CYP7A1, APOC3, APOA5, FABP4, CYP8B1, SLC27A2, SLC27A5, ANGPTL4	140	69	5085	7.89596	2.91321e-07	9.71071e-08	3.20746e-06
KEGG_PATHWAY	hsa00980:Metabolism of xenobiotics by cytochrome P450	14	5.40541	4.66604e-09	GSTA1, CYP3A4, CYP3A5, CYP2C9, CYP2B6, CYP2C8, ADH1C, ADH1B, ADH1A, CYP1A2, CYP2E1, GSTM1, ADH4, UGT1A4, UGT2B10, UGT2B15	140	60	5085	8.475	4.7127e-07	1.17818e-07	5.1887e-06
KEGG_PATHWAY	hsa00260:Glycine, serine and threonine metabolism	10	3.861	7.9541e-08	CTH, GATM, SDS, BHMT, DMGDH, DAO, GNMT, AGXT, SARDH, PIPOX	140	31	5085	11.7166	8.03361e-06	1.60673e-06	8.84507e-05
KEGG_PATHWAY	hsa00983:Drug metabolism	11	4.2471	1.49603e-07	CYP3A4, XDH, CYP3A5, CES2, UPB1, UGT1A4, DPYS, CYP2A6, CYP2A7, UGT2B10, UGT2B15	140	43	5085	9.29153	1.51098e-05	2.51832e-06	0.000166361
KEGG_PATHWAY	hsa00140:Steroid hormone biosynthesis	9	3.4749	2.76468e-05	CYP3A4, CYP3A5, CYP7A1, UGT1A4, HSD11B1, SRD5A2, UGT2B10, UGT2B15, AKR1D1	140	46	5085	7.10637	0.00278847	0.00039883	0.0307394
KEGG_PATHWAY	hsa00650:Butanoate metabolism	8	3.0888	2.84386e-05	HMGCS2, ALDH5A1, AKR1B10, EHHADH, ACSM2A, ABAT, BDH1, ACSM5	140	34	5085	8.54622	0.00286822	0.000358979	0.0316196
KEGG_PATHWAY	hsa00591:Linoleic acid metabolism	7	2.7027	8.59046e-05	CYP3A4, CYP3A5, CYP2C9, AKR1B10, CYP2C8, CYP2E1, CYP1A2	140	28	5085	9.08036	0.00863921	0.000963618	0.0954857
KEGG_PATHWAY	hsa00590:Arachidonic acid metabolism	9	3.4749	0.000119514	CYP4A11, CYP4A22, CYP2C9, CYP2B6, CYP2C8, EPHX2, CYP4F3, CYP2E1, CYP4F2	140	56	5085	5.83737	0.0119991	0.00120644	0.132821
KEGG_PATHWAY	hsa00232:Caffeine metabolism	4	1.5444	0.00064552	XDH, CYP2A6, CYP2A7, CYP1A2	140	7	5085	20.7551	0.0631373	0.00591142	0.715487
KEGG_PATHWAY	hsa00120:Primary bile acid biosynthesis	5	1.9305	0.000753488	BAAT, CYP7A1, CYP8B1, AKR1D1, SLC27A5	140	16	5085	11.3504	0.0733052	0.00632417	0.834702
KEGG_PATHWAY	hsa00250:Alanine, aspartate and glutamate metabolism	6	2.3166	0.00136058	GLS2, ALDH5A1, ABAT, CPS1, AGXT, GPT2	140	31	5085	7.02995	0.128476	0.0105221	1.50261
KEGG_PATHWAY	hsa00270:Cysteine and methionine metabolism	6	2.3166	0.0020864	CTH, MAT1A, SDS, BHMT, CDO1, TAT	140	34	5085	6.40966	0.190183	0.0149547	2.29577
KEGG_PATHWAY	hsa00410:beta-Alanine metabolism	5	1.9305	0.00266607	CNDP1, UPB1, EHHADH, ABAT, DPYS	140	22	5085	8.25487	0.23634	0.0178149	2.92503
KEGG_PATHWAY	hsa00150:Androgen and estrogen metabolism	6	2.3166	0.00306083	UGT1A4, HSD11B1, SRD5A2, UGT2B10, UGT2B15, AKR1D1	140	37	5085	5.88996	0.266273	0.0191651	3.35146
KEGG_PATHWAY	hsa00010:Glycolysis / Gluconeogenesis	7	2.7027	0.00557543	G6PC, ADH4, ALDOB, ADH1C, FBP1, ADH1B, ADH1A, PCK2, PCK1	140	60	5085	4.2375	0.431466	0.0326717	6.02798
KEGG_PATHWAY	hsa00040:Pentose and glucuronate interconversions	4	1.5444	0.0120716	UGT1A4, UGT2B10, UGT2B15, DCXR	140	18	5085	8.07143	0.706728	0.0658773	12.6332
KEGG_PATHWAY	hsa00051:Fructose and mannose metabolism	5	1.9305	0.0131253	SORD, AKR1B10, ALDOB, PFKFB1, FBP1	140	34	5085	5.34139	0.736691	0.0678234	13.6638
KEGG_PATHWAY	hsa00330:Arginine and proline metabolism	6	2.3166	0.0142298	GLS2, PYCR1, GATM, OTC, DAO, CPS1	140	53	5085	4.11186	0.76485	0.0698195	14.7322
KEGG_PATHWAY	hsa00071:Fatty acid metabolism	5	1.9305	0.022816	CYP4A11, CYP4A22, ADH4, EHHADH, ADH1C, ADH1B, ADH1A	140	40	5085	4.54018	0.902812	0.105066	22.6366
KEGG_PATHWAY	hsa00910:Nitrogen metabolism	4	1.5444	0.0237261	GLS2, CTH, CA9, CPS1	140	23	5085	6.31677	0.911541	0.104378	23.4341
KEGG_PATHWAY	hsa00500:Starch and sucrose metabolism	5	1.9305	0.0268039	G6PC, UGT1A4, GYS2, UGT2B10, UGT2B15	140	42	5085	4.32398	0.935697	0.112468	26.0759
KEGG_PATHWAY	hsa02010:ABC transporters	5	1.9305	0.0311847	ABCA8, ABCG8, ABCB11, ABCA6, ABCB4	140	44	5085	4.12744	0.95923	0.12482	29.6931
KEGG_PATHWAY	hsa00340:Histidine metabolism	4	1.5444	0.0435	AMDHD1, CNDP1, FTCD, UROC1	140	29	5085	5.00985	0.988801	0.16446	39.0163

## Sheet: BP
Category	Term	Count	%	PValue	Genes	List Total	Pop Hits	Pop Total	Fold Enrichment	Bonferroni	Benjamini	FDR
GOTERM_BP_FAT	GO:0055114~oxidation reduction	56	21.6216	6.82024e-25	ALDH8A1, CYP3A4, ASPDH, CYP3A5, STEAP4, EHHADH, OGDHL, CYP2D6, ADH1C, ADH1B, ADH1A, TDO2, CYP7A1, AKR7A3, DAO, SRD5A2, NQO1, SARDH, HPD, ALDH6A1, ALDH5A1, CYP2E1, CYP1A2, CDO1, PPARGC1A, HAO1, PYCR1, G6PD, AKR1B10, HAO2, HSD11B1, CYP2A6, CYP2A7, AKR1D1, XDH, PHYHD1, SORD, CYP2B6, HSD17B13, EGLN3, AASS, PAH, PIPOX, CYP4A22, ADH4, FMO3, HSD17B6, DMGDH, BDH1, CYP2C9, CYP2C8, IYD, CYP4A11, CYP4F3, CY…	225	639	13528	5.26912	1.27402e-21	1.27402e-21	1.16327e-21
GOTERM_BP_FAT	GO:0016054~organic acid catabolic process	19	7.33591	2.69547e-13	ALDH6A1, SULT2A1, EHHADH, AASS, PAH, CDO1, TAT, HAO1, AMDHD1, TDO2, SDS, HAO2, PON1, DMGDH, UROC1, AKR1D1, SARDH, PON3, HPD	225	111	13528	10.2916	5.03542e-10	2.51771e-10	4.59766e-10
GOTERM_BP_FAT	GO:0046395~carboxylic acid catabolic process	19	7.33591	2.69547e-13	ALDH6A1, SULT2A1, EHHADH, AASS, PAH, CDO1, TAT, HAO1, AMDHD1, TDO2, SDS, HAO2, PON1, DMGDH, UROC1, AKR1D1, SARDH, PON3, HPD	225	111	13528	10.2916	5.03542e-10	2.51771e-10	4.59766e-10
GOTERM_BP_FAT	GO:0008202~steroid metabolic process	24	9.26641	2.89634e-13	CYP3A4, CYP3A5, SULT2A1, AFP, G6PC, APOA1, NR1I2, G6PD, BAAT, HMGCS2, AKR1B10, CYP7A1, LCAT, APOF, INSIG1, APOC3, UGT1A4, HSD11B1, HSD17B6, SRD5A2, UGT2B15, ANGPTL3, AKR1D1, SLC27A5	225	202	13528	7.1435	5.4108e-10	1.8036e-10	4.94038e-10
GOTERM_BP_FAT	GO:0009725~response to hormone stimulus	29	11.1969	1.41042e-11	RBP4, SLC6A1, ALDOB, PFKFB1, AGXT, GCGR, AHSG, SERPINA7, ANG, LCAT, UGT1A4, SRD5A2, CD24, GHR, SPP1, AR, SOCS2, GATM, FBP1, ESR1, IGF2, CPS1, CDO1, TAT, ABCB4, PCK1, CA9, HMGCS2, FABP4	225	367	13528	4.75098	2.63468e-08	6.5867e-09	2.40564e-08
GOTERM_BP_FAT	GO:0009719~response to endogenous stimulus	30	11.583	2.78745e-11	RBP4, SLC6A1, ALDOB, PFKFB1, AGXT, GCGR, AHSG, SLC1A2, SERPINA7, ANG, LCAT, UGT1A4, SRD5A2, CD24, GHR, SPP1, AR, SOCS2, GATM, FBP1, ESR1, IGF2, CDO1, CPS1, TAT, ABCB4, PCK1, HMGCS2, CA9, FABP4	225	405	13528	4.45366	5.20695e-08	1.04139e-08	4.7543e-08
GOTERM_BP_FAT	GO:0006006~glucose metabolic process	19	7.33591	7.14636e-11	RBP4, SORD, ALDH5A1, OGDHL, PDK4, PFKFB1, ALDOB, FBP1, IGF2, PCK2, CPS1, PPARGC1A, PCK1, G6PC, G6PD, SDS, PPP1R1A, GYS2, DCXR	225	153	13528	7.46643	1.33494e-07	2.2249e-08	1.21889e-07
GOTERM_BP_FAT	GO:0046364~monosaccharide biosynthetic process	11	4.2471	2.98688e-10	RBP4, G6PC, G6PD, SORD, SDS, ALDOB, PFKFB1, FBP1, PCK2, PPARGC1A, PCK1	225	37	13528	17.8748	5.57949e-07	7.9707e-08	5.09446e-07
GOTERM_BP_FAT	GO:0019319~hexose biosynthetic process	10	3.861	1.17073e-09	RBP4, G6PC, SORD, SDS, ALDOB, PFKFB1, FBP1, PCK2, PPARGC1A, PCK1	225	31	13528	19.395	2.18692e-06	2.73365e-07	1.99681e-06
GOTERM_BP_FAT	GO:0006090~pyruvate metabolic process	11	4.2471	1.17367e-09	SLC16A3, RBP4, G6PC, SDS, ALDOB, PFKFB1, FBP1, PCK2, AGXT, PPARGC1A, PCK1	225	42	13528	15.7469	2.19241e-06	2.43601e-07	2.00182e-06
GOTERM_BP_FAT	GO:0046165~alcohol biosynthetic process	11	4.2471	1.92268e-09	RBP4, G6PC, G6PD, SORD, SDS, ALDOB, PFKFB1, FBP1, PCK2, PPARGC1A, PCK1	225	44	13528	15.0311	3.59156e-06	3.59156e-07	3.27934e-06
GOTERM_BP_FAT	GO:0019318~hexose metabolic process	19	7.33591	2.99743e-09	RBP4, SORD, ALDH5A1, OGDHL, PDK4, PFKFB1, ALDOB, FBP1, IGF2, PCK2, CPS1, PPARGC1A, PCK1, G6PC, G6PD, SDS, PPP1R1A, GYS2, DCXR	225	192	13528	5.94981	5.59919e-06	5.09018e-07	5.11246e-06
GOTERM_BP_FAT	GO:0048545~response to steroid hormone stimulus	19	7.33591	2.99743e-09	SLC6A1, SOCS2, PFKFB1, ALDOB, ESR1, CDO1, CPS1, AGXT, TAT, ABCB4, CA9, SERPINA7, LCAT, UGT1A4, FABP4, CD24, SRD5A2, SPP1, GHR	225	192	13528	5.94981	5.59919e-06	5.09018e-07	5.11246e-06
GOTERM_BP_FAT	GO:0006094~gluconeogenesis	9	3.4749	4.23319e-09	RBP4, G6PC, SDS, ALDOB, PFKFB1, FBP1, PCK2, PPARGC1A, PCK1	225	25	13528	21.6448	7.90757e-06	6.58966e-07	7.22018e-06
GOTERM_BP_FAT	GO:0006631~fatty acid metabolic process	19	7.33591	4.90177e-09	ACSM2B, ALDH5A1, EHHADH, ACSM2A, EPHX2, PPARGC1A, HAO1, CYP4A11, BAAT, HAO2, ACOT12, FABP4, CYP4F3, CYP4F2, ANGPTL3, SLC27A2, SLC27A5, ACSM5, GHR	225	198	13528	5.76952	9.15647e-06	7.04347e-07	8.36052e-06
GOTERM_BP_FAT	GO:0010033~response to organic substance	36	13.8996	8.82833e-09	RBP4, AQP9, SLC6A1, ALDOB, PFKFB1, AGXT, GCGR, AHSG, SLC1A2, SERPINA7, ANG, LCAT, UGT1A4, CHRNA4, GYS2, SRD5A2, CD24, GHR, SPP1, F12, AR, SOCS2, GATM, FBP1, ESR1, IGF2, CDO1, CPS1, TAT, ABCB4, PCK1, AFP, HMGCS2, CA9, ABAT, FABP4	225	721	13528	3.00205	1.64912e-05	1.17795e-06	1.50577e-05
GOTERM_BP_FAT	GO:0009063~cellular amino acid catabolic process	12	4.6332	1.34384e-08	AMDHD1, ALDH6A1, TDO2, SDS, AASS, DMGDH, PAH, UROC1, CDO1, TAT, SARDH, HPD	225	68	13528	10.6102	2.51027e-05	1.67353e-06	2.29208e-05
GOTERM_BP_FAT	GO:0009611~response to wounding	30	11.583	1.4294e-08	C7, MASP2, C6, S100A9, AHSG, F13B, SLC1A2, LPA, KLKB1, APOA5, SERPINC1, APOH, CD24, CFHR5, EPO, SPP1, KNG1, F11, F12, GATM, EPHX2, F9, IGF2, C4BPA, CDO1, CCL16, PLG, C8A, C8B, FBLN5	225	530	13528	3.40327	2.67009e-05	1.66883e-06	2.438e-05
GOTERM_BP_FAT	GO:0006575~cellular amino acid derivative metabolic process	17	6.56371	1.56779e-08	GSTA1, GATM, ALDH5A1, PAH, CDO1, CPS1, TDO2, CTH, APOA1, G6PD, LCAT, PON1, ABAT, DMGDH, ETNK2, GNMT, GHR	225	166	13528	6.15732	2.9286e-05	1.72273e-06	2.67405e-05
GOTERM_BP_FAT	GO:0034637~cellular carbohydrate biosynthetic process	12	4.6332	1.57567e-08	RBP4, G6PC, G6PD, SORD, SDS, ALDOB, PFKFB1, FBP1, GYS2, PCK2, PPARGC1A, PCK1	225	69	13528	10.4564	2.94331e-05	1.6352e-06	2.68749e-05
GOTERM_BP_FAT	GO:0005996~monosaccharide metabolic process	19	7.33591	2.95818e-08	RBP4, SORD, ALDH5A1, OGDHL, PDK4, PFKFB1, ALDOB, FBP1, IGF2, PCK2, CPS1, PPARGC1A, PCK1, G6PC, G6PD, SDS, PPP1R1A, GYS2, DCXR	225	222	13528	5.14579	5.52574e-05	2.90836e-06	5.04551e-05
GOTERM_BP_FAT	GO:0043434~response to peptide hormone stimulus	16	6.17761	3.87948e-08	RBP4, AR, GATM, SOCS2, PFKFB1, ALDOB, FBP1, IGF2, CPS1, CDO1, PCK1, AHSG, HMGCS2, SERPINA7, SRD5A2, GHR	225	154	13528	6.2467	7.2466e-05	3.62342e-06	6.61688e-05
GOTERM_BP_FAT	GO:0051384~response to glucocorticoid stimulus	12	4.6332	5.89751e-08	SERPINA7, LCAT, ALDOB, PFKFB1, UGT1A4, FABP4, CPS1, CDO1, AGXT, TAT, GHR, ABCB4	225	78	13528	9.24991	0.000110159	5.24596e-06	0.000100589
GOTERM_BP_FAT	GO:0009310~amine catabolic process	12	4.6332	5.89751e-08	AMDHD1, ALDH6A1, TDO2, SDS, AASS, DMGDH, PAH, UROC1, CDO1, TAT, SARDH, HPD	225	78	13528	9.24991	0.000110159	5.24596e-06	0.000100589
GOTERM_BP_FAT	GO:0030195~negative regulation of blood coagulation	8	3.0888	6.0807e-08	F11, KNG1, F12, KLKB1, APOH, CPB2, TMPRSS6, PLG	225	23	13528	20.9129	0.000113581	5.16306e-06	0.000103713
GOTERM_BP_FAT	GO:0051241~negative regulation of multicellular organismal process	16	6.17761	9.00867e-08	KNG1, ABCG8, F11, F12, RBP4, APOA1, SLC6A1, KLKB1, APOC3, APOH, IGF2, CD24, CPB2, TMPRSS6, PLG, AHSG	225	164	13528	5.8658	0.000168268	7.31658e-06	0.000153653
GOTERM_BP_FAT	GO:0030193~regulation of blood coagulation	9	3.4749	1.01236e-07	F11, KNG1, F12, KLKB1, APOH, HRG, CPB2, TMPRSS6, PLG	225	36	13528	15.0311	0.000189091	7.87952e-06	0.00017267
GOTERM_BP_FAT	GO:0055088~lipid homeostasis	10	3.861	1.32522e-07	ABCG8, G6PC, APOA1, LCAT, APOA5, APOC3, FABP4, IGF2, CD24, ANGPTL3	225	51	13528	11.7891	0.00024752	9.90197e-06	0.00022603
GOTERM_BP_FAT	GO:0017144~drug metabolic process	7	2.7027	1.344e-07	CYP3A4, CYP2C9, FMO3, CYP2D6, EPHX2, CYP2E1, CYP1A2	225	16	13528	26.3044	0.000251028	9.65608e-06	0.000229234
GOTERM_BP_FAT	GO:0051917~regulation of fibrinolysis	6	2.3166	1.42119e-07	F11, F12, KLKB1, APOH, HRG, PLG	225	9	13528	40.083	0.000265443	9.83249e-06	0.0002424
GOTERM_BP_FAT	GO:0031960~response to corticosteroid stimulus	12	4.6332	1.46137e-07	SERPINA7, LCAT, ALDOB, PFKFB1, UGT1A4, FABP4, CPS1, CDO1, AGXT, TAT, GHR, ABCB4	225	85	13528	8.48816	0.000272946	9.74935e-06	0.000249252
GOTERM_BP_FAT	GO:0051186~cofactor metabolic process	17	6.56371	1.51263e-07	GSTA1, ASPDH, ALDH5A1, ALDOB, FTCD, CYP1A2, PIPOX, TDO2, CTH, GLYAT, G6PD, BAAT, HPX, ADH4, UGT1A4, ACOT12, DCXR	225	195	13528	5.24162	0.000282519	9.74336e-06	0.000257995
GOTERM_BP_FAT	GO:0050819~negative regulation of coagulation	8	3.0888	1.56397e-07	F11, KNG1, F12, KLKB1, APOH, CPB2, TMPRSS6, PLG	225	26	13528	18.4998	0.000292108	9.7383e-06	0.000266753
GOTERM_BP_FAT	GO:0006081~cellular aldehyde metabolic process	8	3.0888	2.7369e-07	ALDH8A1, HAO1, RBP4, ADH4, AKR1B10, AKR7A3, DAO, AGXT	225	28	13528	17.1784	0.000511122	1.64919e-05	0.000466807
GOTERM_BP_FAT	GO:0050818~regulation of coagulation	9	3.4749	2.97673e-07	F11, KNG1, F12, KLKB1, APOH, HRG, CPB2, TMPRSS6, PLG	225	41	13528	13.198	0.000555899	1.73765e-05	0.000507713
GOTERM_BP_FAT	GO:0032101~regulation of response to external stimulus	15	5.79151	3.9125e-07	F11, KNG1, F12, IGF2, TMPRSS6, PLG, AHSG, KLKB1, APOH, SERPINC1, FABP4, HRG, CD24, CPB2, SPP1	225	159	13528	5.67212	0.000730588	2.21469e-05	0.000667318
GOTERM_BP_FAT	GO:0006805~xenobiotic metabolic process	7	2.7027	6.15391e-07	CYP3A4, NR1I2, UGT1A4, EPHX2, CYP1A2, UGT2B15, NQO1	225	20	13528	21.0436	0.00114889	3.38097e-05	0.00104961
GOTERM_BP_FAT	GO:0019439~aromatic compound catabolic process	7	2.7027	6.15391e-07	TDO2, EPHX2, PON1, PAH, TAT, PON3, HPD	225	20	13528	21.0436	0.00114889	3.38097e-05	0.00104961
GOTERM_BP_FAT	GO:0002526~acute inflammatory response	12	4.6332	6.35619e-07	C8A, C8B, C7, F12, MASP2, C6, KLKB1, EPHX2, IGF2, C4BPA, CFHR5, AHSG	225	98	13528	7.36218	0.00118663	3.39233e-05	0.00108411
GOTERM_BP_FAT	GO:0046942~carboxylic acid transport	14	5.40541	9.77416e-07	SLC38A4, SLC38A3, SLC13A5, AQP9, SLC6A1, AGXT, SLC7A11, SLCO2A1, SLC10A1, SLC16A3, SLC1A5, SLC1A2, SLC6A8, SLC38A1	225	147	13528	5.72614	0.00182415	5.07157e-05	0.00166708
GOTERM_BP_FAT	GO:0015849~organic acid transport	14	5.40541	1.05604e-06	SLC38A4, SLC38A3, SLC13A5, AQP9, SLC6A1, AGXT, SLC7A11, SLCO2A1, SLC10A1, SLC16A3, SLC1A5, SLC1A2, SLC6A8, SLC38A1	225	148	13528	5.68745	0.00197074	5.33143e-05	0.00180118
GOTERM_BP_FAT	GO:0016042~lipid catabolic process	15	5.79151	1.0921e-06	SULT2A1, EHHADH, SPHK1, CPS1, HAO1, AZGP1, CYP7A1, APOC3, HAO2, APOA5, ASPG, HSD17B6, SRD5A2, ANGPTL3, AKR1D1	225	173	13528	5.2131	0.00203796	5.36839e-05	0.00186268
GOTERM_BP_FAT	GO:0051605~protein maturation by peptide bond cleavage	11	4.2471	1.49568e-06	C8A, F11, C8B, C7, F12, MASP2, C6, KLKB1, APOH, C4BPA, CFHR5	225	86	13528	7.69034	0.00279003	7.16366e-05	0.00255101
GOTERM_BP_FAT	GO:0009410~response to xenobiotic stimulus	7	2.7027	1.53743e-06	CYP3A4, NR1I2, UGT1A4, EPHX2, CYP1A2, UGT2B15, NQO1	225	23	13528	18.2987	0.0028678	7.17954e-05	0.00262222
GOTERM_BP_FAT	GO:0016051~carbohydrate biosynthetic process	12	4.6332	1.54283e-06	RBP4, G6PC, G6PD, SORD, SDS, ALDOB, PFKFB1, FBP1, GYS2, PCK2, PPARGC1A, PCK1	225	107	13528	6.74293	0.00287786	7.02904e-05	0.00263144
GOTERM_BP_FAT	GO:0018904~organic ether metabolic process	9	3.4749	2.32768e-06	MOGAT2, G6PC, ANG, APOA5, APOC3, APOH, CYP1A2, CPS1, PCK1	225	53	13528	10.2098	0.00433867	0.000103521	0.00397004
GOTERM_BP_FAT	GO:0055092~sterol homeostasis	8	3.0888	2.53399e-06	ABCG8, G6PC, APOA1, LCAT, APOC3, FABP4, CD24, ANGPTL3	225	38	13528	12.6578	0.00472232	0.000110075	0.00432192
GOTERM_BP_FAT	GO:0042632~cholesterol homeostasis	8	3.0888	2.53399e-06	ABCG8, G6PC, APOA1, LCAT, APOC3, FABP4, CD24, ANGPTL3	225	38	13528	12.6578	0.00472232	0.000110075	0.00432192
GOTERM_BP_FAT	GO:0046486~glycerolipid metabolic process	14	5.40541	2.92846e-06	MOGAT2, G6PC, APOA1, ANG, ALDH5A1, LCAT, APOA5, APOC3, GPLD1, APOH, PON1, ETNK2, CPS1, PCK1	225	162	13528	5.19594	0.00545544	0.000124319	0.0049947
GOTERM_BP_FAT	GO:0009069~serine family amino acid metabolic process	7	2.7027	3.36365e-06	CTH, BAAT, SDS, DMGDH, CDO1, AGXT, SARDH	225	26	13528	16.1874	0.00626361	0.000139619	0.00573692
GOTERM_BP_FAT	GO:0034754~cellular hormone metabolic process	9	3.4749	5.34739e-06	ALDH8A1, AFP, RBP4, APOA1, ADH4, UGT1A4, HSD17B6, SRD5A2, AKR1D1	225	59	13528	9.17153	0.00993923	0.000217128	0.00912018
GOTERM_BP_FAT	GO:0007596~blood coagulation	11	4.2471	7.14425e-06	F11, F13B, KNG1, F12, LPA, FBLN5, KLKB1, APOH, SERPINC1, F9, PLG	225	102	13528	6.48401	0.0132568	0.000283907	0.0121846
GOTERM_BP_FAT	GO:0050817~coagulation	11	4.2471	7.14425e-06	F11, F13B, KNG1, F12, LPA, FBLN5, KLKB1, APOH, SERPINC1, F9, PLG	225	102	13528	6.48401	0.0132568	0.000283907	0.0121846
GOTERM_BP_FAT	GO:0006732~coenzyme metabolic process	13	5.01931	8.96407e-06	GSTA1, ASPDH, ALDH5A1, ALDOB, FTCD, PIPOX, TDO2, CTH, GLYAT, BAAT, G6PD, ACOT12, DCXR	225	153	13528	5.10861	0.0166055	0.000348792	0.0152881
GOTERM_BP_FAT	GO:0007599~hemostasis	11	4.2471	1.19124e-05	F11, F13B, KNG1, F12, LPA, FBLN5, KLKB1, APOH, SERPINC1, F9, PLG	225	108	13528	6.12379	0.0220067	0.000454029	0.020316
GOTERM_BP_FAT	GO:0048878~chemical homeostasis	24	9.26641	1.38426e-05	KNG1, FXYD1, C7, RBP4, AQP9, OTC, EPHX2, IGF2, HP, CPS1, PPARGC1A, HPR, PCK1, ABCG8, G6PC, APOA1, HPX, LCAT, APOA5, APOC3, CHRNA4, FABP4, RGN, CD24, ANGPTL3	225	512	13528	2.81833	0.0255267	0.00051703	0.0236075
GOTERM_BP_FAT	GO:0006639~acylglycerol metabolic process	8	3.0888	1.47772e-05	MOGAT2, G6PC, ANG, APOA5, APOC3, APOH, CPS1, PCK1	225	49	13528	9.81624	0.0272265	0.000541109	0.0252012
GOTERM_BP_FAT	GO:0016485~protein processing	11	4.2471	1.64359e-05	C8A, F11, C8B, C7, F12, MASP2, C6, KLKB1, APOH, C4BPA, CFHR5	225	112	13528	5.90508	0.030236	0.00059026	0.0280296
GOTERM_BP_FAT	GO:0006638~neutral lipid metabolic process	8	3.0888	1.69433e-05	MOGAT2, G6PC, ANG, APOA5, APOC3, APOH, CPS1, PCK1	225	50	13528	9.61991	0.0311546	0.000596997	0.0288947
GOTERM_BP_FAT	GO:0042060~wound healing	14	5.40541	1.76195e-05	F13B, KNG1, F11, F12, LPA, GATM, FBLN5, KLKB1, APOA5, APOH, SERPINC1, F9, IGF2, PLG	225	191	13528	4.40703	0.0323777	0.000609322	0.0300477
GOTERM_BP_FAT	GO:0051919~positive regulation of fibrinolysis	4	1.5444	1.77013e-05	F11, F12, KLKB1, PLG	225	4	13528	60.1244	0.0325257	0.000601027	0.0301873
GOTERM_BP_FAT	GO:0009991~response to extracellular stimulus	15	5.79151	1.79168e-05	RBP4, GATM, ALDOB, PFKFB1, CPS1, GCGR, PPARGC1A, G6PC, SLC1A2, HMGCS2, ALB, UGT1A4, SERPINC1, SPP1, GHR	225	220	13528	4.09939	0.032915	0.00059748	0.0305547
GOTERM_BP_FAT	GO:0006662~glycerol ether metabolic process	8	3.0888	1.93651e-05	MOGAT2, G6PC, ANG, APOA5, APOC3, APOH, CPS1, PCK1	225	51	13528	9.43129	0.0355278	0.000634435	0.0330241
GOTERM_BP_FAT	GO:0008203~cholesterol metabolic process	10	3.861	2.10255e-05	G6PD, APOA1, HMGCS2, CYP7A1, LCAT, APOF, APOC3, INSIG1, ANGPTL3, AKR1D1	225	92	13528	6.53527	0.0385147	0.000676944	0.0358553
GOTERM_BP_FAT	GO:0050878~regulation of body fluid levels	12	4.6332	2.23861e-05	F11, F13B, KNG1, F12, LPA, FBLN5, KLKB1, APOH, SERPINC1, F9, AGR2, PLG	225	141	13528	5.11697	0.0409554	0.000708524	0.0381751
GOTERM_BP_FAT	GO:0031667~response to nutrient levels	14	5.40541	2.44828e-05	RBP4, GATM, PFKFB1, ALDOB, CPS1, GCGR, PPARGC1A, G6PC, HMGCS2, ALB, UGT1A4, SERPINC1, SPP1, GHR	225	197	13528	4.2728	0.0447043	0.000761949	0.0417499
GOTERM_BP_FAT	GO:0006954~inflammatory response	18	6.94981	2.92933e-05	KNG1, C7, F12, MASP2, C6, S100A9, EPHX2, IGF2, C4BPA, CDO1, CCL16, AHSG, C8A, C8B, KLKB1, CD24, CFHR5, SPP1	225	325	13528	3.32997	0.0532504	0.000896658	0.0499512
GOTERM_BP_FAT	GO:0042730~fibrinolysis	5	1.9305	3.26384e-05	F12, KLKB1, CPB2, TMPRSS6, PLG	225	12	13528	25.0519	0.0591481	0.000982896	0.0556538
GOTERM_BP_FAT	GO:0051604~protein maturation	11	4.2471	3.46626e-05	C8A, F11, C8B, C7, F12, MASP2, C6, KLKB1, APOH, C4BPA, CFHR5	225	122	13528	5.42106	0.062699	0.00102726	0.0591045
GOTERM_BP_FAT	GO:0043603~cellular amide metabolic process	8	3.0888	3.6164e-05	ASPDH, TDO2, G6PD, OTC, ALDOB, CPS1, DCXR, GHR	225	56	13528	8.58921	0.0653241	0.001055	0.0616638
GOTERM_BP_FAT	GO:0016125~sterol metabolic process	10	3.861	4.44398e-05	G6PD, APOA1, HMGCS2, CYP7A1, LCAT, APOF, APOC3, INSIG1, ANGPTL3, AKR1D1	225	101	13528	5.95292	0.0796631	0.00127635	0.0757701
GOTERM_BP_FAT	GO:0019748~secondary metabolic process	9	3.4749	4.73671e-05	ALDH8A1, ASPDH, RBP4, TDO2, G6PD, ADH4, ALDOB, CYP1A2, DCXR	225	79	13528	6.84962	0.084682	0.00133977	0.0807591
GOTERM_BP_FAT	GO:0042592~homeostatic process	29	11.1969	4.77503e-05	FXYD1, XDH, C7, RBP4, AQP9, HP, APOA1, ANG, LCAT, APOA5, APOC3, CHRNA4, RGN, CD24, ANGPTL3, EPO, KNG1, OTC, EPHX2, IGF2, CPS1, PPARGC1A, HPR, PLG, PCK1, ABCG8, G6PC, G6PD, HPX, FABP4	225	751	13528	2.32172	0.0853371	0.00133045	0.0814122
GOTERM_BP_FAT	GO:0006956~complement activation	7	2.7027	6.14338e-05	C8A, C8B, C7, MASP2, C6, C4BPA, CFHR5	225	42	13528	10.0207	0.108422	0.00168625	0.104731
GOTERM_BP_FAT	GO:0002541~activation of plasma proteins involved in acute inflammatory response	7	2.7027	7.04181e-05	C8A, C8B, C7, MASP2, C6, C4BPA, CFHR5	225	43	13528	9.7877	0.123261	0.00190464	0.120038
GOTERM_BP_FAT	GO:0006641~triglyceride metabolic process	7	2.7027	7.04181e-05	MOGAT2, G6PC, APOA5, APOC3, APOH, CPS1, PCK1	225	43	13528	9.7877	0.123261	0.00190464	0.120038
GOTERM_BP_FAT	GO:0006958~complement activation, classical pathway	6	2.3166	0.000102201	C8A, C8B, C7, MASP2, C6, C4BPA	225	29	13528	12.4395	0.173802	0.00272373	0.174172
GOTERM_BP_FAT	GO:0007586~digestion	9	3.4749	0.000130196	ABCG8, MOGAT2, RBP4, BAAT, SULT2A1, AKR1B10, UGT1A4, PPARGC1A, AKR1D1	225	91	13528	5.94637	0.215902	0.00341979	0.221831
GOTERM_BP_FAT	GO:0002455~humoral immune response mediated by circulating immunoglobulin	6	2.3166	0.000142338	C8A, C8B, C7, MASP2, C6, C4BPA	225	31	13528	11.637	0.23349	0.00368634	0.242497
GOTERM_BP_FAT	GO:0051004~regulation of lipoprotein lipase activity	5	1.9305	0.000147027	APOA5, APOC3, APOH, ANGPTL3, ANGPTL4	225	17	13528	17.6837	0.240175	0.00375549	0.250475
GOTERM_BP_FAT	GO:0008652~cellular amino acid biosynthetic process	7	2.7027	0.000186313	PYCR1, CTH, OTC, BHMT, PAH, CDO1, AGXT	225	51	13528	8.25237	0.293948	0.00469255	0.317303
GOTERM_BP_FAT	GO:0044242~cellular lipid catabolic process	8	3.0888	0.000257685	HAO1, EHHADH, HAO2, APOA5, APOC3, SPHK1, CPS1, ANGPTL3	225	76	13528	6.32889	0.382094	0.00639835	0.438603
GOTERM_BP_FAT	GO:0010876~lipid localization	11	4.2471	0.000284771	ABCG8, RBP4, LPA, APOA1, LCAT, APOF, APOA5, APOC3, APOH, ANGPTL3, SLCO2A1	225	157	13528	4.21254	0.412587	0.00697592	0.4846
GOTERM_BP_FAT	GO:0031638~zymogen activation	4	1.5444	0.000349552	F11, F12, KLKB1, APOH	225	9	13528	26.722	0.479558	0.00844566	0.59453
GOTERM_BP_FAT	GO:0006706~steroid catabolic process	5	1.9305	0.00035099	SULT2A1, CYP7A1, HSD17B6, SRD5A2, AKR1D1	225	21	13528	14.3153	0.480955	0.008372	0.596969
GOTERM_BP_FAT	GO:0042445~hormone metabolic process	9	3.4749	0.000373786	ALDH8A1, AFP, RBP4, APOA1, ADH4, UGT1A4, HSD17B6, SRD5A2, AKR1D1	225	106	13528	5.10491	0.502601	0.00880107	0.635623
GOTERM_BP_FAT	GO:0009309~amine biosynthetic process	8	3.0888	0.000382232	PYCR1, CTH, OTC, BHMT, PAH, ETNK2, CDO1, AGXT	225	81	13528	5.93822	0.51039	0.0088871	0.649943
GOTERM_BP_FAT	GO:0030194~positive regulation of blood coagulation	4	1.5444	0.000493269	F12, APOH, HRG, PLG	225	10	13528	24.0498	0.602139	0.0113139	0.838002
GOTERM_BP_FAT	GO:0042594~response to starvation	6	2.3166	0.000614684	ALB, ALDOB, PFKFB1, UGT1A4, CPS1, PPARGC1A	225	42	13528	8.58921	0.682914	0.0139095	1.04325
GOTERM_BP_FAT	GO:0009071~serine family amino acid catabolic process	4	1.5444	0.000669978	SDS, DMGDH, CDO1, SARDH	225	11	13528	21.8634	0.71405	0.0149704	1.1366
GOTERM_BP_FAT	GO:0006869~lipid transport	10	3.861	0.000689079	ABCG8, RBP4, LPA, APOA1, LCAT, APOF, APOA5, APOC3, APOH, SLCO2A1	225	145	13528	4.14651	0.72408	0.0152122	1.16882
GOTERM_BP_FAT	GO:0043086~negative regulation of catalytic activity	14	5.40541	0.000723887	GNAZ, CDC20, BIRC5, PKIB, IGF2, APOA1, APOC3, GADD45G, FABP4, ANGPTL3, NQO1, GADD45B, DUSP9, ANGPTL4	225	277	13528	3.03878	0.741461	0.0157883	1.22752
GOTERM_BP_FAT	GO:0006865~amino acid transport	8	3.0888	0.00072448	SLC1A5, SLC38A4, SLC1A2, SLC38A3, SLC6A1, SLC6A8, SLC38A1, SLC7A11	225	90	13528	5.3444	0.741748	0.0156188	1.22852
GOTERM_BP_FAT	GO:0015711~organic anion transport	6	2.3166	0.000763974	SLC16A3, SLC1A2, SLC13A5, SLC22A7, SLCO1B1, SLC10A1	225	44	13528	8.19879	0.760128	0.0162759	1.29508
GOTERM_BP_FAT	GO:0015837~amine transport	9	3.4749	0.00076559	SLC1A5, SLC38A4, SLC1A2, SLC38A3, AQP9, SLC6A1, SLC6A8, SLC38A1, SLC7A11	225	118	13528	4.58576	0.760852	0.0161262	1.29781
GOTERM_BP_FAT	GO:0009074~aromatic amino acid family catabolic process	4	1.5444	0.000882424	TDO2, PAH, TAT, HPD	225	12	13528	20.0415	0.807776	0.0183586	1.49446
GOTERM_BP_FAT	GO:0045834~positive regulation of lipid metabolic process	6	2.3166	0.000938789	APOA1, APOA5, IGF2, ANGPTL3, PPARGC1A, SEC14L2	225	46	13528	7.84232	0.827003	0.0193055	1.5892
GOTERM_BP_FAT	GO:0050820~positive regulation of coagulation	4	1.5444	0.00113319	F12, APOH, HRG, PLG	225	13	13528	18.4998	0.879728	0.023006	1.9153
GOTERM_BP_FAT	GO:0032868~response to insulin stimulus	8	3.0888	0.0013507	RBP4, AR, PFKFB1, FBP1, IGF2, GHR, PCK1, AHSG	225	100	13528	4.80996	0.919926	0.0270704	2.27895
GOTERM_BP_FAT	GO:0010038~response to metal ion	9	3.4749	0.00136655	XDH, AQP9, GATM, SLC6A1, LCAT, ALDOB, ABAT, TAT, MT1X	225	129	13528	4.19473	0.922266	0.0270935	2.30541
GOTERM_BP_FAT	GO:0031639~plasminogen activation	3	1.1583	0.00160221	F11, KLKB1, APOH	225	4	13528	45.0933	0.94998	0.0313628	2.69788
GOTERM_BP_FAT	GO:0050727~regulation of inflammatory response	7	2.7027	0.00160525	F12, KLKB1, SERPINC1, FABP4, IGF2, CD24, AHSG	225	76	13528	5.53778	0.950263	0.0310959	2.70293
GOTERM_BP_FAT	GO:0009064~glutamine family amino acid metabolic process	6	2.3166	0.00164267	GLS2, AMDHD1, PYCR1, ALDH5A1, OTC, CPS1	225	52	13528	6.93744	0.953627	0.0314837	2.76512
GOTERM_BP_FAT	GO:0006957~complement activation, alternative pathway	4	1.5444	0.00175925	C8A, C8B, C7, CFHR5	225	15	13528	16.0332	0.962715	0.0333405	2.95858
GOTERM_BP_FAT	GO:0006835~dicarboxylic acid transport	4	1.5444	0.00175925	SLC1A5, SLC1A2, SLC13A5, AGXT	225	15	13528	16.0332	0.962715	0.0333405	2.95858
GOTERM_BP_FAT	GO:0006544~glycine metabolic process	4	1.5444	0.00175925	BAAT, DMGDH, AGXT, SARDH	225	15	13528	16.0332	0.962715	0.0333405	2.95858
GOTERM_BP_FAT	GO:0016064~immunoglobulin mediated immune response	6	2.3166	0.00194618	C8A, C8B, C7, MASP2, C6, C4BPA	225	54	13528	6.68049	0.973721	0.0364517	3.26807
GOTERM_BP_FAT	GO:0006959~humoral immune response	7	2.7027	0.00195905	C8A, C8B, C7, MASP2, C6, C4BPA, CFHR5	225	79	13528	5.32748	0.974347	0.0363249	3.28935
GOTERM_BP_FAT	GO:0045087~innate immune response	9	3.4749	0.0020963	C8A, C8B, C7, F12, MASP2, C6, PGLYRP2, C4BPA, CFHR5	225	138	13528	3.92116	0.980159	0.0384416	3.51593
GOTERM_BP_FAT	GO:0016052~carbohydrate catabolic process	8	3.0888	0.00221905	G6PC, G6PD, SORD, PGLYRP2, ALDOB, PFKFB1, OGDHL, CPS1	225	109	13528	4.4128	0.984232	0.0402544	3.71816
GOTERM_BP_FAT	GO:0019724~B cell mediated immunity	6	2.3166	0.00228877	C8A, C8B, C7, MASP2, C6, C4BPA	225	56	13528	6.4419	0.986162	0.0410956	3.83284
GOTERM_BP_FAT	GO:0042439~ethanolamine and derivative metabolic process	5	1.9305	0.00229846	APOA1, LCAT, PON1, DMGDH, ETNK2	225	34	13528	8.84183	0.986411	0.0408738	3.84877
GOTERM_BP_FAT	GO:0006000~fructose metabolic process	4	1.5444	0.00256578	SORD, ALDOB, PFKFB1, FBP1	225	17	13528	14.1469	0.991762	0.0450961	4.28723
GOTERM_BP_FAT	GO:0051005~negative regulation of lipoprotein lipase activity	3	1.1583	0.00264121	APOC3, ANGPTL3, ANGPTL4	225	5	13528	36.0747	0.992848	0.0459608	4.41061
GOTERM_BP_FAT	GO:0010901~regulation of very-low-density lipoprotein particle remodeling	3	1.1583	0.00264121	APOA1, APOA5, APOC3	225	5	13528	36.0747	0.992848	0.0459608	4.41061
GOTERM_BP_FAT	GO:0033762~response to glucagon stimulus	3	1.1583	0.00264121	PFKFB1, CPS1, CDO1	225	5	13528	36.0747	0.992848	0.0459608	4.41061
GOTERM_BP_FAT	GO:0006694~steroid biosynthetic process	7	2.7027	0.00284023	G6PD, APOA1, HMGCS2, HSD11B1, HSD17B6, SRD5A2, AKR1D1	225	85	13528	4.95142	0.995073	0.0488881	4.73543
GOTERM_BP_FAT	GO:0044275~cellular carbohydrate catabolic process	7	2.7027	0.00284023	G6PC, G6PD, SORD, ALDOB, PFKFB1, OGDHL, CPS1	225	85	13528	4.95142	0.995073	0.0488881	4.73543
GOTERM_BP_FAT	GO:0050778~positive regulation of immune response	9	3.4749	0.00285207	C8A, C8B, C7, MASP2, HPX, C6, C4BPA, CD24, CFHR5	225	145	13528	3.73186	0.995181	0.0486397	4.75472
GOTERM_BP_FAT	GO:0008610~lipid biosynthetic process	14	5.40541	0.00286082	ALDH8A1, MOGAT2, APOA1, G6PD, HMGCS2, LPCAT1, ANG, LCAT, HSD11B1, HSD17B6, ETNK2, SRD5A2, AKR1D1, PCK1	225	323	13528	2.60601	0.99526	0.0483448	4.76897
GOTERM_BP_FAT	GO:0006790~sulfur metabolic process	8	3.0888	0.00300274	GSTA1, CTH, G6PD, ALDH5A1, BHMT, GNMT, CDO1, GHR	225	115	13528	4.18257	0.996366	0.0502316	4.99988
GOTERM_BP_FAT	GO:0002443~leukocyte mediated immunity	7	2.7027	0.00301193	C8A, C8B, C7, CPLX2, MASP2, C6, C4BPA	225	86	13528	4.89385	0.996429	0.0499353	5.01482
GOTERM_BP_FAT	GO:0006952~defense response	21	8.10811	0.00309781	KNG1, C7, F12, MASP2, C6, S100A9, EPHX2, IGF2, CD5L, HP, C4BPA, CDO1, CCL16, HPR, AHSG, C8A, C8B, KLKB1, PGLYRP2, CD24, CFHR5, SPP1	225	615	13528	2.05303	0.996959	0.0508738	5.15428
GOTERM_BP_FAT	GO:0009636~response to toxin	6	2.3166	0.00333485	GLYAT, SLC6A1, EPHX2, PON1, NQO1, SLC7A11	225	61	13528	5.91388	0.99805	0.0541899	5.53819
GOTERM_BP_FAT	GO:0009072~aromatic amino acid family metabolic process	4	1.5444	0.00356818	TDO2, PAH, TAT, HPD	225	19	13528	12.6578	0.998741	0.0573789	5.91467
GOTERM_BP_FAT	GO:0008206~bile acid metabolic process	4	1.5444	0.00356818	BAAT, SULT2A1, AKR1D1, SLC27A5	225	19	13528	12.6578	0.998741	0.0573789	5.91467
GOTERM_BP_FAT	GO:0010817~regulation of hormone levels	9	3.4749	0.00365595	ALDH8A1, AFP, RBP4, APOA1, ADH4, UGT1A4, HSD17B6, SRD5A2, AKR1D1	225	151	13528	3.58358	0.998932	0.0582505	6.05593
GOTERM_BP_FAT	GO:0044092~negative regulation of molecular function	14	5.40541	0.00380226	GNAZ, CDC20, BIRC5, PKIB, IGF2, APOA1, APOC3, GADD45G, FABP4, ANGPTL3, NQO1, GADD45B, DUSP9, ANGPTL4	225	334	13528	2.52019	0.999188	0.0600039	6.29094
GOTERM_BP_FAT	GO:0051262~protein tetramerization	5	1.9305	0.00382218	CTH, ALDH5A1, DPYS, AASS, GNMT	225	39	13528	7.70826	0.999218	0.0598053	6.32291
GOTERM_BP_FAT	GO:0046487~glyoxylate metabolic process	3	1.1583	0.00391863	HAO1, DAO, AGXT	225	6	13528	30.0622	0.999347	0.0607627	6.47748
GOTERM_BP_FAT	GO:0051918~negative regulation of fibrinolysis	3	1.1583	0.00391863	APOH, HRG, PLG	225	6	13528	30.0622	0.999347	0.0607627	6.47748
GOTERM_BP_FAT	GO:0006559~L-phenylalanine catabolic process	3	1.1583	0.00391863	PAH, TAT, HPD	225	6	13528	30.0622	0.999347	0.0607627	6.47748
GOTERM_BP_FAT	GO:0006558~L-phenylalanine metabolic process	3	1.1583	0.00391863	PAH, TAT, HPD	225	6	13528	30.0622	0.999347	0.0607627	6.47748
GOTERM_BP_FAT	GO:0032374~regulation of cholesterol transport	4	1.5444	0.00414706	ABCG8, APOA1, APOC3, PON1	225	20	13528	12.0249	0.999575	0.0636693	6.84261
GOTERM_BP_FAT	GO:0032371~regulation of sterol transport	4	1.5444	0.00414706	ABCG8, APOA1, APOC3, PON1	225	20	13528	12.0249	0.999575	0.0636693	6.84261
GOTERM_BP_FAT	GO:0046496~nicotinamide nucleotide metabolic process	5	1.9305	0.0041926	ASPDH, TDO2, G6PD, ALDOB, DCXR	225	40	13528	7.51556	0.99961	0.0638239	6.91525
GOTERM_BP_FAT	GO:0006769~nicotinamide metabolic process	5	1.9305	0.0041926	ASPDH, TDO2, G6PD, ALDOB, DCXR	225	40	13528	7.51556	0.99961	0.0638239	6.91525
GOTERM_BP_FAT	GO:0046394~carboxylic acid biosynthetic process	9	3.4749	0.00428243	PYCR1, CTH, SDS, OTC, BHMT, PAH, CDO1, AGXT, AKR1D1	225	155	13528	3.4911	0.99967	0.0646237	7.05837
GOTERM_BP_FAT	GO:0016053~organic acid biosynthetic process	9	3.4749	0.00428243	PYCR1, CTH, SDS, OTC, BHMT, PAH, CDO1, AGXT, AKR1D1	225	155	13528	3.4911	0.99967	0.0646237	7.05837
GOTERM_BP_FAT	GO:0009820~alkaloid metabolic process	5	1.9305	0.00458653	ASPDH, TDO2, G6PD, ALDOB, DCXR	225	41	13528	7.33225	0.999814	0.0685099	7.54131
GOTERM_BP_FAT	GO:0002253~activation of immune response	7	2.7027	0.00467816	C8A, C8B, C7, MASP2, C6, C4BPA, CFHR5	225	94	13528	4.47735	0.999843	0.0692808	7.68638
GOTERM_BP_FAT	GO:0019835~cytolysis	4	1.5444	0.00477974	C8A, C8B, C7, C6	225	21	13528	11.4523	0.99987	0.0701796	7.84693
GOTERM_BP_FAT	GO:0051260~protein homooligomerization	7	2.7027	0.00492616	CTH, SLC6A1, ALDH5A1, HAO2, DPYS, GNMT, ANGPTL4	225	95	13528	4.43022	0.999901	0.0716938	8.07791
GOTERM_BP_FAT	GO:0019362~pyridine nucleotide metabolic process	5	1.9305	0.00500461	ASPDH, TDO2, G6PD, ALDOB, DCXR	225	42	13528	7.15767	0.999915	0.0722349	8.20144
GOTERM_BP_FAT	GO:0060192~negative regulation of lipase activity	3	1.1583	0.00542638	APOC3, ANGPTL3, ANGPTL4	225	7	13528	25.7676	0.999961	0.0774994	8.86288
GOTERM_BP_FAT	GO:0046689~response to mercury ion	3	1.1583	0.00542638	AQP9, GATM, TAT	225	7	13528	25.7676	0.999961	0.0774994	8.86288
GOTERM_BP_FAT	GO:0006576~biogenic amine metabolic process	7	2.7027	0.00545096	TDO2, APOA1, LCAT, PON1, DMGDH, PAH, ETNK2	225	97	13528	4.33888	0.999963	0.0772488	8.90129
GOTERM_BP_FAT	GO:0031099~regeneration	6	2.3166	0.00566438	AFP, GATM, PFKFB1, APOA5, APOH, PLG	225	69	13528	5.22821	0.999975	0.0795564	9.23414
GOTERM_BP_FAT	GO:0002449~lymphocyte mediated immunity	6	2.3166	0.00601971	C8A, C8B, C7, MASP2, C6, C4BPA	225	70	13528	5.15352	0.999987	0.0837193	9.78578
GOTERM_BP_FAT	GO:0048584~positive regulation of response to stimulus	11	4.2471	0.00602021	C8A, C8B, C7, MASP2, HPX, C6, FABP4, IGF2, C4BPA, CD24, CFHR5	225	236	13528	2.80241	0.999987	0.0831095	9.78656
GOTERM_BP_FAT	GO:0000096~sulfur amino acid metabolic process	4	1.5444	0.00621181	CTH, BHMT, GNMT, CDO1	225	23	13528	10.4564	0.999991	0.0850206	10.0827
GOTERM_BP_FAT	GO:0001666~response to hypoxia	8	3.0888	0.00691966	CA9, ANG, EGLN3, ABAT, CHRNA4, CD24, EPO, ANGPTL4	225	134	13528	3.58952	0.999998	0.0935904	11.1688
GOTERM_BP_FAT	GO:0002252~immune effector process	8	3.0888	0.00691966	C8A, C8B, C7, CPLX2, MASP2, C6, C4BPA, CFHR5	225	134	13528	3.58952	0.999998	0.0935904	11.1688
GOTERM_BP_FAT	GO:0019433~triglyceride catabolic process	3	1.1583	0.00715653	APOA5, APOC3, CPS1	225	8	13528	22.5467	0.999999	0.0959546	11.5295
GOTERM_BP_FAT	GO:0051240~positive regulation of multicellular organismal process	11	4.2471	0.00747691	F12, SPHK1, EPHX2, APOH, HRG, IGF2, CPS1, PLG, GHR, AHSG, SPP1	225	244	13528	2.71053	0.999999	0.099335	12.0152
GOTERM_BP_FAT	GO:0050731~positive regulation of peptidyl-tyrosine phosphorylation	5	1.9305	0.00747975	HPX, IGF2, CD24, GHR, EPO	225	47	13528	6.39622	0.999999	0.0986725	12.0195
GOTERM_BP_FAT	GO:0019400~alditol metabolic process	4	1.5444	0.00787394	MOGAT2, SORD, ANGPTL3, PCK1	225	25	13528	9.61991	1	0.102892	12.6136
GOTERM_BP_FAT	GO:0051346~negative regulation of hydrolase activity	5	1.9305	0.00805593	APOA1, APOC3, BIRC5, ANGPTL3, ANGPTL4	225	48	13528	6.26296	1	0.104424	12.8866
GOTERM_BP_FAT	GO:0051259~protein oligomerization	9	3.4749	0.00846588	CTH, SLC6A1, ALDH5A1, OTC, HAO2, DPYS, AASS, GNMT, ANGPTL4	225	174	13528	3.10989	1	0.108709	13.4986
GOTERM_BP_FAT	GO:0033500~carbohydrate homeostasis	5	1.9305	0.0086605	RBP4, G6PC, IGF2, PPARGC1A, PCK1	225	49	13528	6.13515	1	0.110321	13.7877
GOTERM_BP_FAT	GO:0042593~glucose homeostasis	5	1.9305	0.0086605	RBP4, G6PC, IGF2, PPARGC1A, PCK1	225	49	13528	6.13515	1	0.110321	13.7877
GOTERM_BP_FAT	GO:0050994~regulation of lipid catabolic process	4	1.5444	0.0087938	APOA5, APOC3, IGF2, ANGPTL3	225	26	13528	9.24991	1	0.111174	13.9852
GOTERM_BP_FAT	GO:0051289~protein homotetramerization	4	1.5444	0.0087938	CTH, ALDH5A1, DPYS, GNMT	225	26	13528	9.24991	1	0.111174	13.9852
GOTERM_BP_FAT	GO:0002250~adaptive immune response	6	2.3166	0.00895694	C8A, C8B, C7, MASP2, C6, C4BPA	225	77	13528	4.68502	1	0.112368	14.2264
GOTERM_BP_FAT	GO:0002460~adaptive immune response based on somatic recombination of immune receptors built from immunoglobulin superfamily domains	6	2.3166	0.00895694	C8A, C8B, C7, MASP2, C6, C4BPA	225	77	13528	4.68502	1	0.112368	14.2264
GOTERM_BP_FAT	GO:0046700~heterocycle catabolic process	6	2.3166	0.00895694	AMDHD1, ALDH6A1, TDO2, UGT1A4, DPYS, UROC1	225	77	13528	4.68502	1	0.112368	14.2264
GOTERM_BP_FAT	GO:0070482~response to oxygen levels	8	3.0888	0.00904771	CA9, ANG, EGLN3, ABAT, CHRNA4, CD24, EPO, ANGPTL4	225	141	13528	3.41132	1	0.112693	14.3603
GOTERM_BP_FAT	GO:0006570~tyrosine metabolic process	3	1.1583	0.00910138	PAH, TAT, HPD	225	9	13528	20.0415	1	0.112578	14.4394
GOTERM_BP_FAT	GO:0046461~neutral lipid catabolic process	3	1.1583	0.00910138	APOA5, APOC3, CPS1	225	9	13528	20.0415	1	0.112578	14.4394
GOTERM_BP_FAT	GO:0044269~glycerol ether catabolic process	3	1.1583	0.00910138	APOA5, APOC3, CPS1	225	9	13528	20.0415	1	0.112578	14.4394
GOTERM_BP_FAT	GO:0046464~acylglycerol catabolic process	3	1.1583	0.00910138	APOA5, APOC3, CPS1	225	9	13528	20.0415	1	0.112578	14.4394
GOTERM_BP_FAT	GO:0006820~anion transport	8	3.0888	0.00973536	SLC16A3, FXYD1, SLC1A2, SLC13A5, SLC22A7, SLCO1B1, ANO1, SLC10A1	225	143	13528	3.36361	1	0.119185	15.3683
GOTERM_BP_FAT	GO:0042493~response to drug	10	3.861	0.00994626	SLC1A2, CA9, HMGCS2, SERPINA7, UGT1A4, ABAT, FABP4, SRD5A2, CPS1, ABCB4	225	216	13528	2.78354	1	0.12083	15.6752
GOTERM_BP_FAT	GO:0015980~energy derivation by oxidation of organic compounds	8	3.0888	0.0100932	G6PC, ALDH5A1, PPP1R1A, GYS2, CYP1A2, CPS1, PPARGC1A, PCK1	225	144	13528	3.34025	1	0.121723	15.8883
GOTERM_BP_FAT	GO:0045017~glycerolipid biosynthetic process	6	2.3166	0.0104746	MOGAT2, APOA1, ANG, LCAT, ETNK2, PCK1	225	80	13528	4.50933	1	0.125242	16.4394
GOTERM_BP_FAT	GO:0006733~oxidoreduction coenzyme metabolic process	5	1.9305	0.0106498	ASPDH, TDO2, G6PD, ALDOB, DCXR	225	52	13528	5.7812	1	0.126405	16.6913
GOTERM_BP_FAT	GO:0019216~regulation of lipid metabolic process	7	2.7027	0.0107712	APOA1, APOA5, APOC3, IGF2, ANGPTL3, PPARGC1A, SEC14L2	225	112	13528	3.75778	1	0.126956	16.8656
GOTERM_BP_FAT	GO:0006749~glutathione metabolic process	4	1.5444	0.0108153	GSTA1, CTH, G6PD, ALDH5A1	225	28	13528	8.58921	1	0.126651	16.9288
GOTERM_BP_FAT	GO:0046164~alcohol catabolic process	6	2.3166	0.0110173	G6PD, SORD, ADH4, ALDOB, PFKFB1, OGDHL	225	81	13528	4.45366	1	0.128073	17.2176
GOTERM_BP_FAT	GO:0006518~peptide metabolic process	5	1.9305	0.011373	GSTA1, CTH, G6PD, ALDH5A1, PGLYRP2	225	53	13528	5.67212	1	0.131137	17.724
GOTERM_BP_FAT	GO:0042398~cellular amino acid derivative biosynthetic process	5	1.9305	0.0121272	GATM, PAH, ETNK2, CPS1, CDO1	225	54	13528	5.56708	1	0.138403	18.788
GOTERM_BP_FAT	GO:0043085~positive regulation of catalytic activity	17	6.56371	0.0128813	C6, PFKFB1, ALDOB, SPHK1, IGF2, CDC20, GCGR, APOA1, PLK1, ANG, GADD45G, APOA5, APOH, RGN, CD24, GADD45B, GHR	225	520	13528	1.96561	1	0.145521	19.8389
GOTERM_BP_FAT	GO:0032368~regulation of lipid transport	4	1.5444	0.0130837	ABCG8, APOA1, APOC3, PON1	225	30	13528	8.01659	1	0.146765	20.1188
GOTERM_BP_FAT	GO:0008209~androgen metabolic process	3	1.1583	0.0136053	HSD17B6, SRD5A2, AKR1D1	225	11	13528	16.3976	1	0.151286	20.8358
GOTERM_BP_FAT	GO:0010565~regulation of cellular ketone metabolic process	5	1.9305	0.0145792	APOA5, BHMT, APOC3, IGF2, PPARGC1A	225	57	13528	5.27407	1	0.160326	22.1585
GOTERM_BP_FAT	GO:0006469~negative regulation of protein kinase activity	6	2.3166	0.0146801	GADD45G, FABP4, IGF2, PKIB, DUSP9, GADD45B	225	87	13528	4.14651	1	0.160414	22.2944
GOTERM_BP_FAT	GO:0060191~regulation of lipase activity	6	2.3166	0.0146801	ANG, APOA5, APOC3, APOH, ANGPTL3, ANGPTL4	225	87	13528	4.14651	1	0.160414	22.2944
GOTERM_BP_FAT	GO:0006091~generation of precursor metabolites and energy	12	4.6332	0.0153029	G6PC, ALDH5A1, PPP1R1A, ALDOB, PFKFB1, OGDHL, GYS2, CYP1A2, CPS1, GCGR, PPARGC1A, PCK1	225	313	13528	2.30509	1	0.16571	23.1277
GOTERM_BP_FAT	GO:0032270~positive regulation of cellular protein metabolic process	10	3.861	0.0156642	F12, PLK1, HPX, KLKB1, CDC20, IGF2, CD24, PPARGC1A, GHR, EPO	225	233	13528	2.58045	1	0.168337	23.6075
GOTERM_BP_FAT	GO:0009075~histidine family amino acid metabolic process	3	1.1583	0.0161499	AMDHD1, FTCD, UROC1	225	12	13528	15.0311	1	0.172137	24.2478
GOTERM_BP_FAT	GO:0046503~glycerolipid catabolic process	3	1.1583	0.0161499	APOA5, APOC3, CPS1	225	12	13528	15.0311	1	0.172137	24.2478
GOTERM_BP_FAT	GO:0006547~histidine metabolic process	3	1.1583	0.0161499	AMDHD1, FTCD, UROC1	225	12	13528	15.0311	1	0.172137	24.2478
GOTERM_BP_FAT	GO:0046463~acylglycerol biosynthetic process	3	1.1583	0.0161499	MOGAT2, ANG, PCK1	225	12	13528	15.0311	1	0.172137	24.2478
GOTERM_BP_FAT	GO:0045909~positive regulation of vasodilation	3	1.1583	0.0161499	EPHX2, IGF2, CPS1	225	12	13528	15.0311	1	0.172137	24.2478
GOTERM_BP_FAT	GO:0046460~neutral lipid biosynthetic process	3	1.1583	0.0161499	MOGAT2, ANG, PCK1	225	12	13528	15.0311	1	0.172137	24.2478
GOTERM_BP_FAT	GO:0033673~negative regulation of kinase activity	6	2.3166	0.0167853	GADD45G, FABP4, IGF2, PKIB, DUSP9, GADD45B	225	90	13528	4.0083	1	0.177323	25.0779
GOTERM_BP_FAT	GO:0006775~fat-soluble vitamin metabolic process	4	1.5444	0.016958	CYP3A4, ALDH8A1, RBP4, ADH4	225	33	13528	7.28781	1	0.177994	25.3021
GOTERM_BP_FAT	GO:0044093~positive regulation of molecular function	18	6.94981	0.0178421	C6, PFKFB1, ALDOB, SPHK1, IGF2, CDC20, GCGR, APOA1, PLK1, ANG, GADD45G, APOA5, PON1, APOH, RGN, CD24, GADD45B, GHR	225	586	13528	1.84683	1	0.185402	26.4397
GOTERM_BP_FAT	GO:0019637~organophosphate metabolic process	9	3.4749	0.0183725	ASPDH, APOA1, LPCAT1, ALDH5A1, LCAT, GPLD1, PON1, ETNK2, ANGPTL3	225	200	13528	2.7056	1	0.189362	27.1143
GOTERM_BP_FAT	GO:0043648~dicarboxylic acid metabolic process	4	1.5444	0.0183767	ALDH5A1, PAH, GHR, PCK1	225	34	13528	7.07346	1	0.188375	27.1196
GOTERM_BP_FAT	GO:0046504~glycerol ether biosynthetic process	3	1.1583	0.0188802	MOGAT2, ANG, PCK1	225	13	13528	13.8749	1	0.19201	27.7546
GOTERM_BP_FAT	GO:0005977~glycogen metabolic process	4	1.5444	0.0198593	G6PC, PPP1R1A, GYS2, CPS1	225	35	13528	6.87137	1	0.199916	28.9745
GOTERM_BP_FAT	GO:0051247~positive regulation of protein metabolic process	10	3.861	0.0200232	F12, PLK1, HPX, KLKB1, CDC20, IGF2, CD24, PPARGC1A, GHR, EPO	225	243	13528	2.47426	1	0.200339	29.1767
GOTERM_BP_FAT	GO:0045765~regulation of angiogenesis	5	1.9305	0.0203712	SPHK1, APOH, ANGPTL3, PLG, ANGPTL4	225	63	13528	4.77178	1	0.202406	29.6046
GOTERM_BP_FAT	GO:0010035~response to inorganic substance	9	3.4749	0.0209247	XDH, AQP9, GATM, SLC6A1, LCAT, ALDOB, ABAT, TAT, MT1X	225	205	13528	2.63961	1	0.206265	30.2798
GOTERM_BP_FAT	GO:0006814~sodium ion transport	7	2.7027	0.0210701	SLC38A4, SLC38A3, SLC13A5, SLC6A8, SLC17A2, SLC38A1, SLC10A1	225	130	13528	3.23747	1	0.206479	30.4562
GOTERM_BP_FAT	GO:0006073~cellular glucan metabolic process	4	1.5444	0.0214061	G6PC, PPP1R1A, GYS2, CPS1	225	36	13528	6.68049	1	0.208358	30.8622
GOTERM_BP_FAT	GO:0044042~glucan metabolic process	4	1.5444	0.0214061	G6PC, PPP1R1A, GYS2, CPS1	225	36	13528	6.68049	1	0.208358	30.8622
GOTERM_BP_FAT	GO:0051348~negative regulation of transferase activity	6	2.3166	0.0215763	GADD45G, FABP4, IGF2, PKIB, DUSP9, GADD45B	225	96	13528	3.75778	1	0.208773	31.067
GOTERM_BP_FAT	GO:0042327~positive regulation of phosphorylation	6	2.3166	0.0224527	ANG, HPX, IGF2, CD24, GHR, EPO	225	97	13528	3.71904	1	0.215256	32.1126
GOTERM_BP_FAT	GO:0030301~cholesterol transport	4	1.5444	0.023017	ABCG8, APOA1, LCAT, APOC3	225	37	13528	6.49994	1	0.218976	32.778
GOTERM_BP_FAT	GO:0015918~sterol transport	4	1.5444	0.023017	ABCG8, APOA1, LCAT, APOC3	225	37	13528	6.49994	1	0.218976	32.778
GOTERM_BP_FAT	GO:0000097~sulfur amino acid biosynthetic process	3	1.1583	0.024871	CTH, BHMT, CDO1	225	15	13528	12.0249	1	0.233407	34.9209
GOTERM_BP_FAT	GO:0010562~positive regulation of phosphorus metabolic process	6	2.3166	0.0252193	ANG, HPX, IGF2, CD24, GHR, EPO	225	100	13528	3.60747	1	0.235134	35.3162
GOTERM_BP_FAT	GO:0045937~positive regulation of phosphate metabolic process	6	2.3166	0.0252193	ANG, HPX, IGF2, CD24, GHR, EPO	225	100	13528	3.60747	1	0.235134	35.3162
GOTERM_BP_FAT	GO:0050730~regulation of peptidyl-tyrosine phosphorylation	5	1.9305	0.0261424	HPX, IGF2, CD24, GHR, EPO	225	68	13528	4.42092	1	0.241525	36.3531
GOTERM_BP_FAT	GO:0034440~lipid oxidation	4	1.5444	0.0264312	HAO1, EHHADH, HAO2, PPARGC1A	225	39	13528	6.16661	1	0.242694	36.6743
GOTERM_BP_FAT	GO:0019395~fatty acid oxidation	4	1.5444	0.0264312	HAO1, EHHADH, HAO2, PPARGC1A	225	39	13528	6.16661	1	0.242694	36.6743
GOTERM_BP_FAT	GO:0030258~lipid modification	5	1.9305	0.0274026	HAO1, LCAT, EHHADH, HAO2, PPARGC1A	225	69	13528	4.35684	1	0.249303	37.7433
GOTERM_BP_FAT	GO:0009081~branched chain family amino acid metabolic process	3	1.1583	0.0281184	ALDH6A1, DAO, GHR	225	16	13528	11.2733	1	0.25378	38.5203
GOTERM_BP_FAT	GO:0006637~acyl-CoA metabolic process	3	1.1583	0.0281184	GLYAT, BAAT, ACOT12	225	16	13528	11.2733	1	0.25378	38.5203
GOTERM_BP_FAT	GO:0043691~reverse cholesterol transport	3	1.1583	0.0281184	APOA1, LCAT, APOC3	225	16	13528	11.2733	1	0.25378	38.5203
GOTERM_BP_FAT	GO:0006739~NADP metabolic process	3	1.1583	0.0281184	ASPDH, G6PD, DCXR	225	16	13528	11.2733	1	0.25378	38.5203
GOTERM_BP_FAT	GO:0019751~polyol metabolic process	4	1.5444	0.0282344	MOGAT2, SORD, ANGPTL3, PCK1	225	40	13528	6.01244	1	0.253495	38.6452
GOTERM_BP_FAT	GO:0007584~response to nutrient	7	2.7027	0.0289917	RBP4, GATM, HMGCS2, UGT1A4, SERPINC1, GCGR, SPP1	225	140	13528	3.00622	1	0.258203	39.4557
GOTERM_BP_FAT	GO:0051591~response to cAMP	4	1.5444	0.0320318	PFKFB1, CPS1, CDO1, AGXT	225	42	13528	5.72614	1	0.280161	42.6088
GOTERM_BP_FAT	GO:0002254~kinin cascade	2	0.772201	0.0328435	F12, KLKB1	225	2	13528	60.1244	1	0.284938	43.4242
GOTERM_BP_FAT	GO:0002542~Factor XII activation	2	0.772201	0.0328435	F12, KLKB1	225	2	13528	60.1244	1	0.284938	43.4242
GOTERM_BP_FAT	GO:0009450~gamma-aminobutyric acid catabolic process	2	0.772201	0.0328435	ALDH5A1, ABAT	225	2	13528	60.1244	1	0.284938	43.4242
GOTERM_BP_FAT	GO:0019482~beta-alanine metabolic process	2	0.772201	0.0328435	ALDH6A1, DPYS	225	2	13528	60.1244	1	0.284938	43.4242
GOTERM_BP_FAT	GO:0007597~blood coagulation, intrinsic pathway	2	0.772201	0.0328435	F12, APOH	225	2	13528	60.1244	1	0.284938	43.4242
GOTERM_BP_FAT	GO:0006868~glutamine transport	2	0.772201	0.0328435	SLC38A3, SLC38A1	225	2	13528	60.1244	1	0.284938	43.4242
GOTERM_BP_FAT	GO:0010954~positive regulation of protein maturation by peptide bond cleavage	2	0.772201	0.0328435	F12, KLKB1	225	2	13528	60.1244	1	0.284938	43.4242
GOTERM_BP_FAT	GO:0055090~acylglycerol homeostasis	2	0.772201	0.0328435	APOA5, ANGPTL3	225	2	13528	60.1244	1	0.284938	43.4242
GOTERM_BP_FAT	GO:0002353~plasma kallikrein-kinin cascade	2	0.772201	0.0328435	F12, KLKB1	225	2	13528	60.1244	1	0.284938	43.4242
GOTERM_BP_FAT	GO:0006112~energy reserve metabolic process	4	1.5444	0.0340256	G6PC, PPP1R1A, GYS2, CPS1	225	43	13528	5.59297	1	0.292353	44.5921
GOTERM_BP_FAT	GO:0006766~vitamin metabolic process	5	1.9305	0.0357189	CYP3A4, ALDH8A1, ASPDH, RBP4, ADH4	225	75	13528	4.0083	1	0.303302	46.2256
GOTERM_BP_FAT	GO:0006720~isoprenoid metabolic process	4	1.5444	0.0360824	ALDH8A1, RBP4, HMGCS2, ADH4	225	44	13528	5.46586	1	0.304565	46.5703
GOTERM_BP_FAT	GO:0031401~positive regulation of protein modification process	8	3.0888	0.0364898	PLK1, HPX, CDC20, IGF2, CD24, PPARGC1A, GHR, EPO	225	187	13528	2.57217	1	0.306124	46.9542
GOTERM_BP_FAT	GO:0005976~polysaccharide metabolic process	6	2.3166	0.0371899	G6PC, ITIH1, PPP1R1A, PGLYRP2, GYS2, CPS1	225	111	13528	3.24997	1	0.309719	47.6077
GOTERM_BP_FAT	GO:0046890~regulation of lipid biosynthetic process	4	1.5444	0.0382019	APOA5, APOC3, IGF2, SEC14L2	225	45	13528	5.3444	1	0.315425	48.5391
GOTERM_BP_FAT	GO:0008406~gonad development	6	2.3166	0.0384244	AFP, RBP4, AR, ANG, SRD5A2, AHSG	225	112	13528	3.22095	1	0.315615	48.7418
GOTERM_BP_FAT	GO:0042219~cellular amino acid derivative catabolic process	3	1.1583	0.0387939	TDO2, ALDH5A1, ABAT	225	19	13528	9.49333	1	0.316808	49.0767
GOTERM_BP_FAT	GO:0034103~regulation of tissue remodeling	3	1.1583	0.0387939	CD24, AHSG, SPP1	225	19	13528	9.49333	1	0.316808	49.0767
GOTERM_BP_FAT	GO:0006541~glutamine metabolic process	3	1.1583	0.0387939	GLS2, ALDH5A1, CPS1	225	19	13528	9.49333	1	0.316808	49.0767
GOTERM_BP_FAT	GO:0033344~cholesterol efflux	3	1.1583	0.0387939	ABCG8, APOA1, APOC3	225	19	13528	9.49333	1	0.316808	49.0767
GOTERM_BP_FAT	GO:0006644~phospholipid metabolic process	8	3.0888	0.0389535	APOA1, LPCAT1, ALDH5A1, LCAT, GPLD1, PON1, ETNK2, ANGPTL3	225	190	13528	2.53156	1	0.316561	49.2208
GOTERM_BP_FAT	GO:0032147~activation of protein kinase activity	6	2.3166	0.040968	ANG, GADD45G, SPHK1, IGF2, GADD45B, GHR	225	114	13528	3.16444	1	0.32879	51.006
GOTERM_BP_FAT	GO:0042312~regulation of vasodilation	3	1.1583	0.0426435	EPHX2, IGF2, CPS1	225	20	13528	9.01867	1	0.33849	52.4456
GOTERM_BP_FAT	GO:0034368~protein-lipid complex remodeling	3	1.1583	0.0426435	LCAT, APOA5, APOC3	225	20	13528	9.01867	1	0.33849	52.4456
GOTERM_BP_FAT	GO:0034367~macromolecular complex remodeling	3	1.1583	0.0426435	LCAT, APOA5, APOC3	225	20	13528	9.01867	1	0.33849	52.4456
GOTERM_BP_FAT	GO:0034369~plasma lipoprotein particle remodeling	3	1.1583	0.0426435	LCAT, APOA5, APOC3	225	20	13528	9.01867	1	0.33849	52.4456
GOTERM_BP_FAT	GO:0044271~nitrogen compound biosynthetic process	11	4.2471	0.0439893	ASPDH, PYCR1, CTH, OTC, BHMT, PAH, ETNK2, CPS1, CDO1, NQO1, AGXT	225	325	13528	2.03498	1	0.345848	53.573
GOTERM_BP_FAT	GO:0002684~positive regulation of immune system process	9	3.4749	0.044745	C8A, C8B, C7, MASP2, HPX, C6, C4BPA, CD24, CFHR5	225	238	13528	2.27361	1	0.349299	54.195
GOTERM_BP_FAT	GO:0051338~regulation of transferase activity	12	4.6332	0.0460009	APOA1, ANG, PFKFB1, GADD45G, SPHK1, FABP4, IGF2, PKIB, CD24, DUSP9, GADD45B, GHR	225	372	13528	1.9395	1	0.355863	55.2113
GOTERM_BP_FAT	GO:0006650~glycerophospholipid metabolic process	6	2.3166	0.0463553	APOA1, ALDH5A1, LCAT, GPLD1, PON1, ETNK2	225	118	13528	3.05718	1	0.356677	55.4943
GOTERM_BP_FAT	GO:0042325~regulation of phosphorylation	14	5.40541	0.0465606	PFKFB1, SPHK1, PKIB, IGF2, APOA1, HPX, ANG, GADD45G, FABP4, CD24, GADD45B, DUSP9, GHR, EPO	225	466	13528	1.80631	1	0.356554	55.6575
GOTERM_BP_FAT	GO:0051347~positive regulation of transferase activity	9	3.4749	0.046581	APOA1, ANG, PFKFB1, GADD45G, SPHK1, IGF2, CD24, GADD45B, GHR	225	240	13528	2.25467	1	0.355282	55.6737
GOTERM_BP_FAT	GO:0046889~positive regulation of lipid biosynthetic process	3	1.1583	0.0466292	APOA5, IGF2, SEC14L2	225	21	13528	8.58921	1	0.354192	55.7118
GOTERM_BP_FAT	GO:0015804~neutral amino acid transport	3	1.1583	0.0466292	SLC1A5, SLC38A3, SLC38A1	225	21	13528	8.58921	1	0.354192	55.7118
GOTERM_BP_FAT	GO:0046470~phosphatidylcholine metabolic process	3	1.1583	0.0466292	APOA1, LCAT, PON1	225	21	13528	8.58921	1	0.354192	55.7118
GOTERM_BP_FAT	GO:0002673~regulation of acute inflammatory response	3	1.1583	0.0466292	F12, KLKB1, IGF2	225	21	13528	8.58921	1	0.354192	55.7118
GOTERM_BP_FAT	GO:0019217~regulation of fatty acid metabolic process	4	1.5444	0.0472972	APOA5, APOC3, IGF2, PPARGC1A	225	49	13528	4.90812	1	0.356933	56.2382
GOTERM_BP_FAT	GO:0043933~macromolecular complex subunit organization	19	7.33591	0.0478473	SLC6A1, ALDH5A1, OTC, ALDOB, DPYS, AASS, PPARGC1A, CLDN14, KIF2C, CTH, APOA1, ANG, LCAT, APOA5, APOC3, HAO2, GNMT, SPP2, ANGPTL4	225	710	13528	1.60896	1	0.35892	56.6671
GOTERM_BP_FAT	GO:0006521~regulation of cellular amino acid metabolic process	2	0.772201	0.0488603	BHMT, IGF2	225	3	13528	40.083	1	0.363683	57.4468
GOTERM_BP_FAT	GO:0010903~negative regulation of very-low-density lipoprotein particle remodeling	2	0.772201	0.0488603	APOA1, APOC3	225	3	13528	40.083	1	0.363683	57.4468
GOTERM_BP_FAT	GO:0030573~bile acid catabolic process	2	0.772201	0.0488603	SULT2A1, AKR1D1	225	3	13528	40.083	1	0.363683	57.4468
GOTERM_BP_FAT	GO:0042866~pyruvate biosynthetic process	2	0.772201	0.0488603	SDS, AGXT	225	3	13528	40.083	1	0.363683	57.4468
GOTERM_BP_FAT	GO:0006208~pyrimidine base catabolic process	2	0.772201	0.0488603	ALDH6A1, DPYS	225	3	13528	40.083	1	0.363683	57.4468
GOTERM_BP_FAT	GO:0006210~thymine catabolic process	2	0.772201	0.0488603	ALDH6A1, DPYS	225	3	13528	40.083	1	0.363683	57.4468
GOTERM_BP_FAT	GO:0046113~nucleobase catabolic process	2	0.772201	0.0488603	ALDH6A1, DPYS	225	3	13528	40.083	1	0.363683	57.4468
GOTERM_BP_FAT	GO:0019859~thymine metabolic process	2	0.772201	0.0488603	ALDH6A1, DPYS	225	3	13528	40.083	1	0.363683	57.4468
GOTERM_BP_FAT	GO:0046434~organophosphate catabolic process	2	0.772201	0.0488603	ASPDH, PON1	225	3	13528	40.083	1	0.363683	57.4468
GOTERM_BP_FAT	GO:0015718~monocarboxylic acid transport	4	1.5444	0.049723	SLC16A3, AQP9, SLCO2A1, SLC10A1	225	50	13528	4.80996	1	0.367474	58.1003

## Sheet: CC
Category	Term	Count	%	PValue	Genes	List Total	Pop Hits	Pop Total	Fold Enrichment	Bonferroni	Benjamini	FDR
GOTERM_CC_FAT	GO:0005576~extracellular region	67	25.8687	7.22247e-08	CNDP1, MASP2, GPLD1, SPINK1, HP, AZGP1, TTR, CFHR3, APOA1, CFHR4, LPA, SERPINA7, ANG, ITIH1, APOF, LCAT, PGLYRP2, SERPINA4, APOA5, APOH, CFHR5, GHR, KNG1, F11, F12, F9, IGFALS, C8A, C8B, C7, RBP4, SORD, C6, HSD17B13, AHSG, F13B, ALB, KLKB1, APOC3, SERPINC1, HRG, ANGPTL3, LECT2, HGFAC, SPP2, SPP1, EPO, ANGPTL4, FETUB, CD5L, IGF2, C4BPA, ECM2, CCL16, HPR, PLG, A1BG, AFP, AFM, CLEC3B, HPX, FBLN5, ZG…	222	2010	12782	1.91922	1.61782e-05	2.02229e-06	9.22042e-05
GOTERM_CC_FAT	GO:0000267~cell fraction	61	23.5521	1.05003e-16	CYP3A4, CYP3A5, SLC13A5, AQP9, SLC6A1, CYP2D6, SLC1A5, SLC1A2, TDO2, CYP7A1, SLC2A2, CHRNA4, SRD5A2, SLC22A1, ALDH5A1, ABCB11, SLC22A7, FBP1, IGFALS, CYP1A2, CYP2E1, AADAC, G6PC, ABAT, CYP2A6, CYP2A7, SLC38A1, UGT2B10, UGT2B15, GCNT3, SORD, RAP1GAP, CYP2B6, DPYS, SLCO2A1, CYP4A22, UGT1A4, FMO3, HSD17B6, GYS2, CD24, CYP2C9, CYP2C8, SPHK1, EPHX2, PLG, SLC10A1, ABCB4, PCK1, SLC16A3, CYP4A11, FBLN5, …	222	1083	12782	3.243	2.4869e-14	1.24345e-14	1.44329e-13
GOTERM_CC_FAT	GO:0005626~insoluble fraction	53	20.4633	1.93538e-16	CYP3A4, CYP3A5, SLC13A5, AQP9, SLC6A1, CYP2D6, SLC1A5, SLC1A2, CYP7A1, SLC2A2, CHRNA4, SRD5A2, SLC22A1, ABCB11, SLC22A7, IGFALS, CYP2E1, CYP1A2, AADAC, G6PC, ABAT, CYP2A6, CYP2A7, SLC38A1, UGT2B10, UGT2B15, GCNT3, SORD, RAP1GAP, CYP2B6, SLCO2A1, CYP4A22, FMO3, UGT1A4, HSD17B6, GYS2, CD24, CYP2C9, CYP2C8, SPHK1, PLG, SLC10A1, ABCB4, SLC16A3, CYP4A11, SLC17A2, SLCO1B1, PON1, CYP4F3, CYP4F2, RDH16, …	222	839	12782	3.63714	4.9738e-14	1.24345e-14	2.88658e-13
GOTERM_CC_FAT	GO:0005624~membrane fraction	51	19.6911	1.15011e-15	CYP3A4, CYP3A5, AQP9, SLC6A1, CYP2D6, SLC1A5, SLC1A2, CYP7A1, SLC2A2, CHRNA4, SRD5A2, SLC22A1, ABCB11, SLC22A7, IGFALS, CYP2E1, CYP1A2, AADAC, G6PC, ABAT, CYP2A6, CYP2A7, SLC38A1, UGT2B10, UGT2B15, GCNT3, SORD, RAP1GAP, CYP2B6, SLCO2A1, CYP4A22, FMO3, UGT1A4, HSD17B6, CD24, CYP2C9, CYP2C8, SPHK1, PLG, SLC10A1, ABCB4, SLC16A3, CYP4A11, SLC17A2, SLCO1B1, PON1, CYP4F3, CYP4F2, RDH16, CYP8B1, PON3	222	809	12782	3.62967	2.4869e-13	4.9738e-14	1.42109e-12
GOTERM_CC_FAT	GO:0044421~extracellular region part	44	16.9884	5.54437e-09	RBP4, SORD, C6, GPLD1, HP, AHSG, TTR, CFHR3, APOA1, SERPINA7, ANG, ALB, APOF, KLKB1, LCAT, APOC3, APOA5, SERPINC1, APOH, LECT2, ANGPTL3, HGFAC, EPO, SPP1, GHR, ANGPTL4, F11, KNG1, F12, IGFALS, IGF2, CD5L, CCL16, ECM2, PLG, HPR, C8A, AFP, C8B, AFM, HPX, FBLN5, PON1, CPB2, PON3	222	960	12782	2.63893	1.24194e-06	1.7742e-07	7.07811e-06
GOTERM_CC_FAT	GO:0005615~extracellular space	41	15.8301	8.33154e-12	RBP4, SORD, C6, HP, AHSG, TTR, CFHR3, APOA1, SERPINA7, ANG, ALB, APOF, KLKB1, LCAT, APOA5, APOC3, SERPINC1, APOH, LECT2, ANGPTL3, HGFAC, EPO, SPP1, GHR, ANGPTL4, F11, KNG1, F12, IGFALS, IGF2, CD5L, CCL16, PLG, HPR, C8A, AFP, C8B, AFM, HPX, PON1, CPB2, PON3	222	685	12782	3.44619	1.86627e-09	3.11045e-10	1.06363e-08
GOTERM_CC_FAT	GO:0005783~endoplasmic reticulum	40	15.444	4.22091e-07	GNAZ, CYP3A4, CYP3A5, CYP2B6, CYP2D6, CLDN14, APOA1, CYP4A22, LPCAT1, CYP7A1, UGT1A4, INSIG1, FMO3, HSD17B6, SRD5A2, HPD, CES3, MOGAT2, CES2, CYP2C9, CYP2C8, IGF2, CYP2E1, CYP1A2, AADAC, CYP4A11, G6PC, HSD11B1, CYP2A6, CYP2A7, CYP4F3, CYP4F2, UGT2B10, RDH16, CYP8B1, DUSP9, UGT2B15, AGR2, SLC27A2, SLC27A5	222	960	12782	2.39902	9.4544e-05	7.87901e-06	0.000538853
GOTERM_CC_FAT	GO:0005792~microsome	30	11.583	6.90303e-17	CYP3A4, CYP3A5, AQP9, CYP2B6, CYP2D6, CYP4A22, CYP7A1, UGT1A4, FMO3, HSD17B6, SRD5A2, CYP2C9, CYP2C8, IGFALS, CYP2E1, CYP1A2, PLG, AADAC, CYP4A11, G6PC, PON1, CYP2A6, CYP2A7, CYP4F3, CYP4F2, UGT2B10, CYP8B1, UGT2B15, RDH16, PON3	222	237	12782	7.28817	2.4869e-14	2.4869e-14	1.44329e-13
GOTERM_CC_FAT	GO:0042598~vesicular fraction	30	11.583	1.52034e-16	CYP3A4, CYP3A5, AQP9, CYP2B6, CYP2D6, CYP4A22, CYP7A1, UGT1A4, FMO3, HSD17B6, SRD5A2, CYP2C9, CYP2C8, IGFALS, CYP2E1, CYP1A2, PLG, AADAC, CYP4A11, G6PC, PON1, CYP2A6, CYP2A7, CYP4F3, CYP4F2, UGT2B10, CYP8B1, UGT2B15, RDH16, PON3	222	244	12782	7.07909	2.4869e-14	8.32667e-15	1.44329e-13
GOTERM_CC_FAT	GO:0031090~organelle membrane	30	11.583	0.01388	CYP3A4, CYP3A5, AP1M2, CYP2B6, CYP7A1, FMO3, BDH1, HPD, GATM, CYP2C9, CYP2C8, OTC, PDK4, IGF2, CYP2E1, CYP1A2, CPS1, ABCB4, AADAC, CYP4A11, G6PC, HMGCS2, ZG16, HSD11B1, CYP2A6, CYP4F3, CYP4F2, CYP8B1, SLC27A2, SLC27A5	222	1096	12782	1.576	0.956321	0.132651	16.3423
GOTERM_CC_FAT	GO:0005739~mitochondrion	28	10.8108	0.0353697	EHHADH, OGDHL, AASS, AGXT, GLYATL1, GLS2, DMGDH, BDH1, SARDH, GHR, ACSM2B, ALDH6A1, GATM, ALDH5A1, OTC, ACSM2A, PDK4, CYP2E1, CPS1, PCK2, TAT, PYCR1, GLYAT, HMGCS2, ANXA10, ABAT, SLC27A2, ACSM5	222	1087	12782	1.48311	0.999686	0.275775	36.8539
GOTERM_CC_FAT	GO:0012505~endomembrane system	24	9.26641	0.00879839	GNAZ, CYP3A4, CYP3A5, AP1M2, CYP2C9, CYP2B6, CYP2C8, IGF2, CYP2E1, CYP1A2, ABCB4, AADAC, CYP4A11, G6PC, CYP7A1, ZG16, FMO3, HSD11B1, CYP2A6, CYP4F3, CYP4F2, CYP8B1, SLC27A5, HPD	222	782	12782	1.76706	0.86187	0.0942374	10.6689
GOTERM_CC_FAT	GO:0044432~endoplasmic reticulum part	23	8.88031	1.49389e-07	CYP3A4, CES3, CYP3A5, CES2, CYP2C9, CYP2B6, CYP2C8, IGF2, CYP2E1, CYP1A2, AADAC, CYP4A11, G6PC, APOA1, CYP7A1, FMO3, HSD11B1, CYP2A6, CYP4F3, CYP4F2, CYP8B1, SLC27A5, HPD	222	347	12782	3.81631	3.34627e-05	3.71813e-06	0.000190715
GOTERM_CC_FAT	GO:0005789~endoplasmic reticulum membrane	20	7.72201	2.11302e-07	CYP3A4, CYP3A5, CYP2C9, CYP2B6, CYP2C8, IGF2, CYP2E1, CYP1A2, AADAC, CYP4A11, G6PC, CYP7A1, FMO3, HSD11B1, CYP2A6, CYP4F3, CYP4F2, CYP8B1, SLC27A5, HPD	222	269	12782	4.28079	4.73306e-05	4.30287e-06	0.000269754
GOTERM_CC_FAT	GO:0042175~nuclear envelope-endoplasmic reticulum network	20	7.72201	4.87157e-07	CYP3A4, CYP3A5, CYP2C9, CYP2B6, CYP2C8, IGF2, CYP2E1, CYP1A2, AADAC, CYP4A11, G6PC, CYP7A1, FMO3, HSD11B1, CYP2A6, CYP4F3, CYP4F2, CYP8B1, SLC27A5, HPD	222	284	12782	4.05469	0.000109117	8.39406e-06	0.000621918
GOTERM_CC_FAT	GO:0019898~extrinsic to membrane	17	6.56371	0.0119895	CYP3A5, RAP1GAP, CYP2C9, CYP2B6, CYP2C8, CYP2D6, CYP2E1, CYP1A2, CYP4A11, CYP4A22, CYP7A1, CYP2A6, GFRA1, CYP2A7, CYP4F2, DCXR, GHR	222	494	12782	1.98138	0.93292	0.120728	14.2716
GOTERM_CC_FAT	GO:0031980~mitochondrial lumen	14	5.40541	0.00016109	ACSM2B, OTC, ACSM2A, PDK4, OGDHL, CPS1, AGXT, GLS2, HMGCS2, DMGDH, ABAT, BDH1, SARDH, ACSM5	222	227	12782	3.55098	0.0354437	0.0022529	0.205458
GOTERM_CC_FAT	GO:0005759~mitochondrial matrix	14	5.40541	0.00016109	ACSM2B, OTC, ACSM2A, PDK4, OGDHL, CPS1, AGXT, GLS2, HMGCS2, DMGDH, ABAT, BDH1, SARDH, ACSM5	222	227	12782	3.55098	0.0354437	0.0022529	0.205458
GOTERM_CC_FAT	GO:0005625~soluble fraction	12	4.6332	0.0204062	TDO2, SORD, ALDH5A1, FBLN5, SPHK1, EPHX2, FBP1, GYS2, IGFALS, DPYS, FABP4, PCK1	222	313	12782	2.20741	0.99013	0.175046	23.1417
GOTERM_CC_FAT	GO:0005777~peroxisome	11	4.2471	1.13018e-05	HAO1, XDH, FNDC5, BAAT, EHHADH, HAO2, EPHX2, DAO, AGXT, SLC27A2, PIPOX	222	103	12782	6.14895	0.00252841	0.00016876	0.0144272
GOTERM_CC_FAT	GO:0042579~microbody	11	4.2471	1.13018e-05	HAO1, XDH, FNDC5, BAAT, EHHADH, HAO2, EPHX2, DAO, AGXT, SLC27A2, PIPOX	222	103	12782	6.14895	0.00252841	0.00016876	0.0144272
GOTERM_CC_FAT	GO:0034364~high-density lipoprotein particle	8	3.0888	1.54954e-07	APOA1, LCAT, APOF, APOA5, APOC3, APOH, PON1, HP, HPR	222	25	12782	18.4245	3.4709e-05	3.47095e-06	0.000197818
GOTERM_CC_FAT	GO:0034358~plasma lipoprotein particle	8	3.0888	1.87117e-06	APOA1, LCAT, APOF, APOA5, APOC3, APOH, PON1, HP, HPR	222	35	12782	13.1604	0.000419055	2.99384e-05	0.00238877
GOTERM_CC_FAT	GO:0032994~protein-lipid complex	8	3.0888	1.87117e-06	APOA1, LCAT, APOF, APOA5, APOC3, APOH, PON1, HP, HPR	222	35	12782	13.1604	0.000419055	2.99384e-05	0.00238877
GOTERM_CC_FAT	GO:0005579~membrane attack complex	4	1.5444	0.000169547	C8A, C8B, C7, C6	222	7	12782	32.9009	0.0372695	0.00223173	0.216233
GOTERM_CC_FAT	GO:0034366~spherical high-density lipoprotein particle	4	1.5444	0.000267816	APOA1, APOC3, PON1, HP, HPR	222	8	12782	28.7883	0.0582343	0.00332771	0.341363
GOTERM_CC_FAT	GO:0034385~triglyceride-rich lipoprotein particle	4	1.5444	0.0046776	APOA1, APOA5, APOC3, APOH	222	20	12782	11.5153	0.650146	0.0537758	5.80996
GOTERM_CC_FAT	GO:0034361~very-low-density lipoprotein particle	4	1.5444	0.0046776	APOA1, APOA5, APOC3, APOH	222	20	12782	11.5153	0.650146	0.0537758	5.80996
GOTERM_CC_FAT	GO:0042627~chylomicron	3	1.1583	0.0175231	APOA5, APOC3, APOH	222	12	12782	14.3941	0.980936	0.158166	20.2033

## Sheet: MF
Supplementary Table 3. KEGG and GO enrichment analysis of DEGs between the high and low immunoscore group in 342 TCGA-LIHC samples.
Category	Term	Count	%	PValue	Genes	List Total	Pop Hits	Pop Total	Fold Enrichment	Bonferroni	Benjamini	FDR
GOTERM_MF_FAT	GO:0009055~electron carrier activity	26	10.0386	9.89685e-14	CYP3A4, XDH, STEAP4, CYP3A5, CYP2B6, CYP2D6, AASS, CYP4A22, CYP7A1, HSD17B6, DMGDH, AKR7A3, NQO1, CYP2C9, CYP2C8, CYP1A2, CYP2E1, HAO1, CYP4A11, HAO2, CYP2A6, CYP2A7, CYP4F3, CYP4F2, CYP8B1, RDH16	228	221	12983	6.69917	6.06385e-11	6.06385e-11	1.46527e-10
GOTERM_MF_FAT	GO:0005506~iron ion binding	26	10.0386	1.58534e-10	XDH, CYP3A4, PHYHD1, CYP3A5, STEAP4, CYP2C9, CYP2B6, CYP2C8, CYP2D6, EGLN3, PAH, CYP2E1, CYP1A2, CDO1, CYP4A11, AMDHD1, TDO2, CYP4A22, HPX, CYP7A1, CYP2A6, CYP4F3, CYP2A7, CYP4F2, CYP8B1, HPD	228	308	12983	4.80688	9.71813e-08	2.42953e-08	2.34829e-07
GOTERM_MF_FAT	GO:0048037~cofactor binding	24	9.26641	6.82429e-11	XDH, ASPDH, STEAP4, ALDH6A1, SORD, EHHADH, OGDHL, PAH, BIRC5, AGXT, TAT, HAO1, CTH, G6PD, ALB, SDS, ADH4, FMO3, HAO2, ABAT, DMGDH, NQO1, SARDH, GPT2	228	249	12983	5.48848	4.18329e-08	1.39443e-08	1.01085e-07
GOTERM_MF_FAT	GO:0008289~lipid binding	21	8.10811	0.000125018	RBP5, CYP3A4, RBP4, ALDH6A1, AR, OTC, ESR1, CPS1, SEC14L2, AZGP1, APOA1, ANXA10, ALB, ADH4, APOF, APOA5, APOC3, APOH, PON1, FABP4, AKR1D1	228	450	12983	2.65734	0.0737775	0.0040256	0.185024
GOTERM_MF_FAT	GO:0004857~enzyme inhibitor activity	18	6.94981	5.30634e-06	KNG1, TESC, FETUB, SPINK1, BIRC5, PKIB, AHSG, LPA, SERPINA7, ITIH1, PPP1R1A, SERPINA4, APOC3, SERPINC1, HRG, ANGPTL3, SPP2, ANGPTL4	228	270	12983	3.7962	0.00324751	0.000232315	0.00785976
GOTERM_MF_FAT	GO:0020037~heme binding	17	6.56371	3.16715e-10	CYP3A4, CYP3A5, CYP2C9, CYP2B6, CYP2C8, CYP2D6, CYP2E1, CYP1A2, CYP4A11, TDO2, CYP4A22, CYP7A1, CYP2A6, CYP4F3, CYP2A7, CYP4F2, CYP8B1	228	121	12983	8.00025	1.94146e-07	3.88293e-08	4.69136e-07
GOTERM_MF_FAT	GO:0046906~tetrapyrrole binding	17	6.56371	8.3366e-10	CYP3A4, CYP3A5, CYP2C9, CYP2B6, CYP2C8, CYP2D6, CYP2E1, CYP1A2, CYP4A11, TDO2, CYP4A22, CYP7A1, CYP2A6, CYP4F3, CYP2A7, CYP4F2, CYP8B1	228	129	12983	7.50411	5.11033e-07	8.51722e-08	1.23486e-06
GOTERM_MF_FAT	GO:0030246~carbohydrate binding	17	6.56371	0.000506299	F11, KNG1, SORD, PFKFB1, ALDOB, FBP1, ECM2, G6PD, CLEC3B, ANG, PGLYRP2, ZG16, APOA5, APOH, SERPINC1, HRG, CD24	228	354	12983	2.73455	0.266876	0.011869	0.747342
GOTERM_MF_FAT	GO:0019842~vitamin binding	16	6.17761	7.84052e-09	RBP5, RBP4, OGDHL, FTCD, EGLN3, AGXT, TAT, SEC14L2, CTH, SDS, ALB, ADH4, ABAT, DMGDH, GNMT, GPT2	228	130	12983	7.00837	4.80623e-06	6.0078e-07	1.16138e-05
GOTERM_MF_FAT	GO:0031406~carboxylic acid binding	16	6.17761	3.18718e-08	ALDH6A1, OTC, EGLN3, FTCD, DPYS, PAH, AGXT, TAT, PCK1, AZGP1, TDO2, ALB, FMO3, DMGDH, FABP4, GNMT	228	144	12983	6.327	1.95372e-05	2.17082e-06	4.72103e-05
GOTERM_MF_FAT	GO:0050662~coenzyme binding	15	5.79151	3.51603e-06	XDH, ASPDH, STEAP4, ALDH6A1, SORD, EHHADH, OGDHL, HAO1, G6PD, ADH4, HAO2, FMO3, DMGDH, NQO1, SARDH	228	181	12983	4.71903	0.00215301	0.000165781	0.00520802
GOTERM_MF_FAT	GO:0019825~oxygen binding	14	5.40541	2.3283e-13	CYP3A4, CYP3A5, CYP2C9, CYP2B6, CYP2C8, CYP1A2, CYP2E1, CYP4A11, TDO2, ALB, CYP4F3, CYP2A7, CYP4F2, CYP8B1	228	43	12983	18.5396	1.42715e-10	7.13574e-11	3.44857e-10
GOTERM_MF_FAT	GO:0043176~amine binding	12	4.6332	3.4202e-06	TDO2, OTC, FMO3, APOA5, FTCD, DPYS, CHRNA4, DMGDH, PAH, GNMT, AGXT, TAT	228	110	12983	6.21196	0.00209439	0.0001747	0.00506607
GOTERM_MF_FAT	GO:0015293~symporter activity	12	4.6332	2.81058e-05	SLC16A3, SLC1A5, SLC38A4, SLC1A2, SLC38A3, SLC13A5, SLC6A1, SLC6A8, SLC2A2, SLC17A2, SLC38A1, SLC10A1	228	137	12983	4.98771	0.0170815	0.00114795	0.0416238
GOTERM_MF_FAT	GO:0004866~endopeptidase inhibitor activity	12	4.6332	4.75325e-05	KNG1, LPA, SERPINA7, ITIH1, FETUB, SERPINA4, SERPINC1, SPINK1, BIRC5, HRG, SPP2, AHSG	228	145	12983	4.71252	0.0287177	0.00181948	0.0703847
GOTERM_MF_FAT	GO:0030414~peptidase inhibitor activity	12	4.6332	7.7548e-05	KNG1, LPA, SERPINA7, ITIH1, FETUB, SERPINA4, SERPINC1, SPINK1, BIRC5, HRG, SPP2, AHSG	228	153	12983	4.46612	0.0464265	0.00263756	0.114807
GOTERM_MF_FAT	GO:0042803~protein homodimerization activity	12	4.6332	0.0331202	G6PD, SDS, ALDH5A1, EPHX2, PON1, GYS2, ABAT, PAH, BIRC5, AGXT, PON3, GHR	228	334	12983	2.04586	1	0.279437	39.2804
GOTERM_MF_FAT	GO:0016712~oxidoreductase activity, acting on paired donors, with incorporation or reduction of molecular oxygen, reduced flavin or flavoprotein as one donor, and incorporation of one atom of oxygen	10	3.861	1.35523e-09	CYP3A4, CYP3A5, CYP2C9, CYP2B6, CYP2C8, CYP2D6, CYP2A6, CYP2A7, CYP2E1, CYP1A2	228	30	12983	18.981	8.30755e-07	1.18679e-07	2.00744e-06
GOTERM_MF_FAT	GO:0016597~amino acid binding	10	3.861	8.87874e-07	TDO2, OTC, FMO3, FTCD, DPYS, DMGDH, PAH, GNMT, AGXT, TAT	228	60	12983	9.4905	0.000544119	4.94776e-05	0.00131516
GOTERM_MF_FAT	GO:0004252~serine-type endopeptidase activity	10	3.861	0.00154036	F11, F12, LPA, MASP2, KLKB1, F9, HP, HGFAC, TMPRSS6, HPR, PLG	228	154	12983	3.6976	0.611309	0.030023	2.25756
GOTERM_MF_FAT	GO:0008236~serine-type peptidase activity	10	3.861	0.00409749	F11, F12, LPA, MASP2, KLKB1, F9, HP, HGFAC, TMPRSS6, HPR, PLG	228	178	12983	3.19904	0.919293	0.0657629	5.90065
GOTERM_MF_FAT	GO:0017171~serine hydrolase activity	10	3.861	0.0044014	F11, F12, LPA, MASP2, KLKB1, F9, HP, HGFAC, TMPRSS6, HPR, PLG	228	180	12983	3.1635	0.933064	0.0669847	6.3251
GOTERM_MF_FAT	GO:0015294~solute:cation symporter activity	9	3.4749	0.000254068	SLC1A5, SLC1A2, SLC13A5, SLC6A1, SLC6A8, SLC2A2, SLC17A2, SLC38A1, SLC10A1	228	95	12983	5.3946	0.144239	0.00775794	0.375681
GOTERM_MF_FAT	GO:0004091~carboxylesterase activity	9	3.4749	0.00027306	AADAC, CES3, CES2, BAAT, LCAT, ACOT12, ASPG, PON1, PON3	228	96	12983	5.3384	0.154146	0.00794014	0.40371
GOTERM_MF_FAT	GO:0005539~glycosaminoglycan binding	9	3.4749	0.00319729	F11, KNG1, ANG, PGLYRP2, APOA5, APOH, SERPINC1, HRG, ECM2	228	140	12983	3.66062	0.859574	0.054544	4.63284
GOTERM_MF_FAT	GO:0030247~polysaccharide binding	9	3.4749	0.005679	F11, KNG1, ANG, PGLYRP2, APOA5, APOH, SERPINC1, HRG, ECM2	228	154	12983	3.32784	0.969534	0.0816254	8.08999
GOTERM_MF_FAT	GO:0001871~pattern binding	9	3.4749	0.005679	F11, KNG1, ANG, PGLYRP2, APOA5, APOH, SERPINC1, HRG, ECM2	228	154	12983	3.32784	0.969534	0.0816254	8.08999
GOTERM_MF_FAT	GO:0005543~phospholipid binding	9	3.4749	0.0126977	APOA1, ANXA10, OTC, APOA5, APOC3, APOH, PON1, CPS1, SEC14L2	228	177	12983	2.89541	0.999604	0.150577	17.2453
GOTERM_MF_FAT	GO:0070330~aromatase activity	8	3.0888	1.67456e-07	CYP3A5, CYP2B6, CYP2C8, CYP2D6, CYP2A6, CYP2A7, CYP2E1, CYP1A2	228	25	12983	18.2218	0.000102645	1.0265e-05	0.000248046
GOTERM_MF_FAT	GO:0005275~amine transmembrane transporter activity	8	3.0888	0.00030315	SLC1A5, SLC38A4, SLC1A2, SLC38A3, AQP9, SLC6A1, SLC38A1, SLC7A11	228	74	12983	6.156	0.16961	0.00804828	0.448105
GOTERM_MF_FAT	GO:0008201~heparin binding	8	3.0888	0.0021792	F11, KNG1, ANG, APOA5, APOH, SERPINC1, HRG, ECM2	228	103	12983	4.42276	0.737449	0.0385691	3.17983
GOTERM_MF_FAT	GO:0008509~anion transmembrane transporter activity	8	3.0888	0.0147528	FXYD1, SLC1A5, SLC1A2, SLC13A5, SLC22A7, SLCO1B1, SLC17A2, ANO1	228	147	12983	3.09894	0.99989	0.169672	19.7605
GOTERM_MF_FAT	GO:0015370~solute:sodium symporter activity	7	2.7027	0.000278071	SLC1A5, SLC1A2, SLC13A5, SLC6A1, SLC6A8, SLC38A1, SLC10A1	228	52	12983	7.6654	0.156741	0.00771921	0.411105
GOTERM_MF_FAT	GO:0070279~vitamin B6 binding	7	2.7027	0.000342667	CTH, SDS, ALB, ABAT, AGXT, TAT, GPT2	228	54	12983	7.3815	0.189489	0.00871558	0.506378
GOTERM_MF_FAT	GO:0030170~pyridoxal phosphate binding	7	2.7027	0.000342667	CTH, SDS, ALB, ABAT, AGXT, TAT, GPT2	228	54	12983	7.3815	0.189489	0.00871558	0.506378
GOTERM_MF_FAT	GO:0015171~amino acid transmembrane transporter activity	7	2.7027	0.000555979	SLC1A5, SLC38A4, SLC1A2, SLC38A3, SLC6A1, SLC38A1, SLC7A11	228	59	12983	6.75595	0.288877	0.0125469	0.820393
GOTERM_MF_FAT	GO:0005496~steroid binding	7	2.7027	0.000860494	CYP3A4, AR, APOA1, APOF, APOC3, ESR1, AKR1D1	228	64	12983	6.22814	0.410045	0.0186703	1.26706
GOTERM_MF_FAT	GO:0031402~sodium ion binding	7	2.7027	0.0167785	SLC38A4, SLC38A3, SLC13A5, SLC6A8, SLC17A2, SLC38A1, SLC10A1	228	117	12983	3.40685	0.999969	0.184033	22.1698
GOTERM_MF_FAT	GO:0005343~organic acid:sodium symporter activity	6	2.3166	6.24289e-05	SLC1A5, SLC1A2, SLC13A5, SLC6A1, SLC38A1, SLC10A1	228	25	12983	13.6663	0.037547	0.00224865	0.0924333
GOTERM_MF_FAT	GO:0004867~serine-type endopeptidase inhibitor activity	6	2.3166	0.0225271	SERPINA7, ITIH1, SERPINA4, SERPINC1, SPINK1, HRG	228	92	12983	3.71367	0.999999	0.231665	28.6449
GOTERM_MF_FAT	GO:0016878~acid-thiol ligase activity	5	1.9305	0.000353807	ACSM2B, ACSM2A, SLC27A2, ACSM5, SLC27A5	228	20	12983	14.2357	0.195007	0.00863935	0.5228
GOTERM_MF_FAT	GO:0016877~ligase activity, forming carbon-sulfur bonds	5	1.9305	0.0011644	ACSM2B, ACSM2A, SLC27A2, ACSM5, SLC27A5	228	27	12983	10.545	0.510414	0.0243266	1.71098
GOTERM_MF_FAT	GO:0016645~oxidoreductase activity, acting on the CH-NH group of donors	5	1.9305	0.00153334	PYCR1, AASS, DMGDH, SARDH, PIPOX	228	29	12983	9.81776	0.60963	0.0308689	2.24738
GOTERM_MF_FAT	GO:0016769~transferase activity, transferring nitrogenous groups	5	1.9305	0.00174525	GATM, ABAT, AGXT, TAT, GPT2	228	30	12983	9.4905	0.657257	0.0329081	2.55424
GOTERM_MF_FAT	GO:0004869~cysteine-type endopeptidase inhibitor activity	5	1.9305	0.0038235	KNG1, FETUB, BIRC5, HRG, AHSG	228	37	12983	7.695	0.904468	0.0631484	5.51644
GOTERM_MF_FAT	GO:0015179~L-amino acid transmembrane transporter activity	5	1.9305	0.00421564	SLC1A2, SLC38A3, SLC6A1, SLC38A1, SLC7A11	228	38	12983	7.4925	0.924954	0.0658785	6.06588
GOTERM_MF_FAT	GO:0042562~hormone binding	5	1.9305	0.010426	TTR, AR, SERPINA7, ESR1, GHR	228	49	12983	5.81051	0.998379	0.130353	14.3797
GOTERM_MF_FAT	GO:0005319~lipid transporter activity	5	1.9305	0.0242863	ABCG8, CFHR4, APOA1, APOF, SLCO2A1	228	63	12983	4.51928	1	0.239685	30.5235
GOTERM_MF_FAT	GO:0016702~oxidoreductase activity, acting on single donors with incorporation of molecular oxygen, incorporation of two atoms of oxygen	5	1.9305	0.0282305	PHYHD1, TDO2, EGLN3, CDO1, HPD	228	66	12983	4.31386	1	0.265063	34.5696
GOTERM_MF_FAT	GO:0016701~oxidoreductase activity, acting on single donors with incorporation of molecular oxygen	5	1.9305	0.029625	PHYHD1, TDO2, EGLN3, CDO1, HPD	228	67	12983	4.24948	1	0.268348	35.9467
GOTERM_MF_FAT	GO:0005507~copper ion binding	5	1.9305	0.0325347	AFP, STEAP4, ANG, ALB, MT1X	228	69	12983	4.1263	1	0.278933	38.7334
GOTERM_MF_FAT	GO:0050660~FAD binding	5	1.9305	0.0372025	XDH, STEAP4, FMO3, DMGDH, SARDH	228	72	12983	3.95437	1	0.296807	42.969
GOTERM_MF_FAT	GO:0004033~aldo-keto reductase activity	4	1.5444	0.00205456	ADH4, AKR1B10, AKR7A3, AKR1D1	228	15	12983	15.1848	0.716556	0.0374837	3.00053
GOTERM_MF_FAT	GO:0015175~neutral amino acid transmembrane transporter activity	4	1.5444	0.00555936	SLC1A5, SLC38A3, SLC38A1, SLC7A11	228	21	12983	10.8463	0.967202	0.0818871	7.92606
GOTERM_MF_FAT	GO:0008483~transaminase activity	4	1.5444	0.00555936	ABAT, AGXT, TAT, GPT2	228	21	12983	10.8463	0.967202	0.0818871	7.92606
GOTERM_MF_FAT	GO:0016620~oxidoreductase activity, acting on the aldehyde or oxo group of donors, NAD or NADP as acceptor	4	1.5444	0.00721527	ALDH8A1, ALDH6A1, ALDH5A1, ADH4	228	23	12983	9.90313	0.988192	0.0980827	10.1712
GOTERM_MF_FAT	GO:0008028~monocarboxylic acid transmembrane transporter activity	4	1.5444	0.00814109	SLC16A3, ABCB11, SLCO2A1, SLC10A1	228	24	12983	9.4905	0.993335	0.107639	11.404
GOTERM_MF_FAT	GO:0015296~anion:cation symporter activity	4	1.5444	0.0165351	SLC1A5, SLC1A2, SLC13A5, SLC17A2	228	31	12983	7.34748	0.999964	0.184876	21.8839
GOTERM_MF_FAT	GO:0016229~steroid dehydrogenase activity	4	1.5444	0.0165351	HSD11B1, HSD17B6, SRD5A2, AKR1D1	228	31	12983	7.34748	0.999964	0.184876	21.8839
GOTERM_MF_FAT	GO:0005504~fatty acid binding	4	1.5444	0.0283965	AZGP1, ALDH6A1, ALB, FABP4	228	38	12983	5.994	1	0.262482	34.7349
GOTERM_MF_FAT	GO:0048029~monosaccharide binding	4	1.5444	0.0324278	G6PD, ALDOB, PFKFB1, FBP1	228	40	12983	5.6943	1	0.281992	38.6331
GOTERM_MF_FAT	GO:0047760~butyrate-CoA ligase activity	3	1.1583	0.00603212	ACSM2B, ACSM2A, ACSM5	228	7	12983	24.4041	0.975495	0.0845201	8.57231
GOTERM_MF_FAT	GO:0005283~sodium:amino acid symporter activity	3	1.1583	0.010105	SLC1A2, SLC6A1, SLC38A1	228	9	12983	18.981	0.998022	0.129209	13.9673
GOTERM_MF_FAT	GO:0019203~carbohydrate phosphatase activity	3	1.1583	0.0124868	G6PC, PFKFB1, FBP1	228	10	12983	17.0829	0.999548	0.15116	16.983
GOTERM_MF_FAT	GO:0034185~apolipoprotein binding	3	1.1583	0.0124868	LPA, LCAT, PLG	228	10	12983	17.0829	0.999548	0.15116	16.983
GOTERM_MF_FAT	GO:0017153~sodium:dicarboxylate symporter activity	3	1.1583	0.0124868	SLC1A5, SLC1A2, SLC13A5	228	10	12983	17.0829	0.999548	0.15116	16.983
GOTERM_MF_FAT	GO:0004745~retinol dehydrogenase activity	3	1.1583	0.0124868	ADH4, HSD17B6, RDH16	228	10	12983	17.0829	0.999548	0.15116	16.983
GOTERM_MF_FAT	GO:0019841~retinol binding	3	1.1583	0.0178981	RBP5, RBP4, ADH4	228	12	12983	14.2357	0.999984	0.191765	23.4724
GOTERM_MF_FAT	GO:0005416~cation:amino acid symporter activity	3	1.1583	0.0178981	SLC1A2, SLC6A1, SLC38A1	228	12	12983	14.2357	0.999984	0.191765	23.4724
GOTERM_MF_FAT	GO:0016918~retinal binding	3	1.1583	0.0178981	RBP5, RBP4, ADH4	228	12	12983	14.2357	0.999984	0.191765	23.4724
GOTERM_MF_FAT	GO:0005542~folic acid binding	3	1.1583	0.0241191	FTCD, DMGDH, GNMT	228	14	12983	12.2021	1	0.242061	30.3471
GOTERM_MF_FAT	GO:0070325~lipoprotein receptor binding	3	1.1583	0.0275137	APOA1, APOA5, APOC3	228	15	12983	11.3886	1	0.26317	33.851
GOTERM_MF_FAT	GO:0042301~phosphate binding	3	1.1583	0.0275137	G6PC, OTC, GHR	228	15	12983	11.3886	1	0.26317	33.851
GOTERM_MF_FAT	GO:0008395~steroid hydroxylase activity	3	1.1583	0.0275137	CYP3A4, CYP7A1, CYP8B1	228	15	12983	11.3886	1	0.26317	33.851
GOTERM_MF_FAT	GO:0005310~dicarboxylic acid transmembrane transporter activity	3	1.1583	0.0310876	SLC1A5, SLC1A2, SLC13A5	228	16	12983	10.6768	1	0.275775	37.3619
GOTERM_MF_FAT	GO:0015485~cholesterol binding	3	1.1583	0.0348336	APOA1, APOF, APOC3	228	17	12983	10.0488	1	0.284208	40.8549
GOTERM_MF_FAT	GO:0032934~sterol binding	3	1.1583	0.042814	APOA1, APOF, APOC3	228	19	12983	8.991	1	0.329914	47.6994
GOTERM_MF_FAT	GO:0015186~L-glutamine transmembrane transporter activity	2	0.772201	0.0346644	SLC38A3, SLC38A1	228	2	12983	56.943	1	0.286742	40.7011
GOTERM_MF_FAT	GO:0003973~(S)-2-hydroxy-acid oxidase activity	2	0.772201	0.0346644	HAO1, HAO2	228	2	12983	56.943	1	0.286742	40.7011
GOTERM_MF_FAT	GO:0050051~leukotriene-B4 20-monooxygenase activity	2	0.772201	0.0346644	CYP4F3, CYP4F2	228	2	12983	56.943	1	0.286742	40.7011
GOTERM_MF_FAT	GO:0004882~androgen receptor activity	2	0.772201	0.0346644	NR1I3, AR	228	2	12983	56.943	1	0.286742	40.7011
GOTERM_MF_FAT	GO:0018685~alkane 1-monooxygenase activity	2	0.772201	0.0346644	CYP4A11, CYP4A22	228	2	12983	56.943	1	0.286742	40.7011
GOTERM_MF_FAT	GO:0016899~oxidoreductase activity, acting on the CH-OH group of donors, oxygen as acceptor	2	0.772201	0.0346644	HAO1, HAO2	228	2	12983	56.943	1	0.286742	40.7011
GOTERM_MF_FAT	GO:0004611~phosphoenolpyruvate carboxykinase activity	2	0.772201	0.0346644	PCK2, PCK1	228	2	12983	56.943	1	0.286742	40.7011
GOTERM_MF_FAT	GO:0004613~phosphoenolpyruvate carboxykinase (GTP) activity	2	0.772201	0.0346644	PCK2, PCK1	228	2	12983	56.943	1	0.286742	40.7011
