# Supplementary material for: A novel immune-related genes prognosis biomarker for hepatocellular carcinoma
Source: Aging (Albany NY). 2020 Nov 26;13(1):675–93. doi: 10.18632/aging.202173 (PMC7834986; doi:10.18632/aging.202173)
Supplement: Supplementary Table 4 [file aging-13-202173-s005.xlsx]

## Sheet: High
Supplementary Table 4. Gene set enrichment analyses between the high and low immunoscore group in 342 TCGA-LIHC samples
Terms enriched in high immunoscore group
NAME	SIZE	ES	NES	NOM p-val	FDR q-val	FWER p-val	RANK AT MAX	LEADING EDGE
KEGG (2 terms)
KEGG_CELL_CYCLE	124	0.625783	1.71892	0.0101626	0.330724	0.235	2299	tags=41%, list=12%, signal=46%
KEGG_HOMOLOGOUS_RECOMBINATION	28	0.641512	1.55518	0.0394191	0.60863	0.668	4897	tags=61%, list=25%, signal=81%
Cellular component (37 terms)
GO_MICROTUBULE	417	0.410234	1.49929	0.015534	0.3331	0.989	4037	tags=34%, list=21%, signal=42%
GO_SPINDLE	354	0.500511	1.66217	0.0214844	0.458868	0.737	3031	tags=30%, list=15%, signal=34%
GO_CHROMOSOMAL_REGION	324	0.541959	1.63581	0.0471513	0.2922	0.804	3232	tags=35%, list=16%, signal=41%
GO_CONDENSED_CHROMOSOME	217	0.576772	1.61494	0.0422265	0.305458	0.861	3251	tags=38%, list=17%, signal=45%
GO_CHROMOSOME_CENTROMERIC_REGION	191	0.592083	1.6363	0.0332031	0.306698	0.804	2807	tags=35%, list=14%, signal=41%
GO_MIDBODY	182	0.496025	1.7417	0.00406504	0.525414	0.481	1686	tags=20%, list=9%, signal=22%
GO_SPINDLE_POLE	164	0.523419	1.63882	0.0288462	0.335538	0.801	2678	tags=30%, list=14%, signal=34%
GO_MICROTUBULE_ASSOCIATED_COMPLEX	150	0.457524	1.49742	0.0256917	0.324185	0.989	3877	tags=35%, list=20%, signal=43%
GO_MITOTIC_SPINDLE	121	0.556646	1.65251	0.0230326	0.358643	0.767	1410	tags=25%, list=7%, signal=27%
GO_CONDENSED_CHROMOSOME_CENTROMERIC_REGION	117	0.655324	1.63879	0.042065	0.316965	0.801	2906	tags=43%, list=15%, signal=50%
GO_CONDENSED_NUCLEAR_CHROMOSOME	98	0.572773	1.59198	0.038817	0.2917	0.896	1617	tags=29%, list=8%, signal=31%
GO_NUCLEAR_PORE	91	0.419011	1.6601	0.0327198	0.389926	0.746	3286	tags=26%, list=17%, signal=32%
GO_SERINE_THREONINE_PROTEIN_KINASE_COMPLEX	86	0.433665	1.53166	0.0133843	0.311094	0.968	2136	tags=21%, list=11%, signal=23%
GO_PRERIBOSOME	76	0.571369	1.6411	0.0433925	0.349978	0.793	5906	tags=64%, list=30%, signal=92%
GO_HETEROCHROMATIN	74	0.544515	1.70367	0.0139165	0.513313	0.6	4019	tags=45%, list=21%, signal=56%
GO_CYTOPLASMIC_MICROTUBULE	69	0.450608	1.44453	0.0177515	0.378629	0.998	2791	tags=29%, list=14%, signal=34%
GO_SPINDLE_MICROTUBULE	60	0.730809	1.81884	0	0.889138	0.272	1096	tags=35%, list=6%, signal=37%
GO_KINESIN_COMPLEX	54	0.6145	1.54991	0.0349515	0.315776	0.948	2702	tags=43%, list=14%, signal=49%
GO_NUCLEAR_UBIQUITIN_LIGASE_COMPLEX	43	0.548655	1.66197	0.0230326	0.418418	0.739	3328	tags=35%, list=17%, signal=42%
GO_CYCLIN_DEPENDENT_PROTEIN_KINASE_HOLOENZYME_COMPLEX	42	0.639356	1.76882	0	0.788868	0.386	2078	tags=33%, list=11%, signal=37%
GO_CELL_CORTEX_REGION	42	0.494938	1.53501	0.0221774	0.311371	0.966	1594	tags=24%, list=8%, signal=26%
GO_SMALL_SUBUNIT_PROCESSOME	38	0.557202	1.64451	0.0382409	0.361767	0.782	5468	tags=61%, list=28%, signal=84%
GO_SPINDLE_MIDZONE	34	0.705949	1.70436	0.00390625	0.612062	0.599	1146	tags=35%, list=6%, signal=37%
GO_FLEMMING_BODY	31	0.589401	1.69672	0.0161943	0.474737	0.628	2642	tags=29%, list=13%, signal=34%
GO_NUCLEAR_HETEROCHROMATIN	31	0.565802	1.57065	0.0315582	0.312761	0.929	4019	tags=58%, list=21%, signal=73%
GO_90S_PRERIBOSOME	31	0.577415	1.695	0.0430528	0.420878	0.634	6150	tags=68%, list=31%, signal=99%
GO_CONDENSED_NUCLEAR_CHROMOSOME_CENTROMERIC_REGION	26	0.794765	1.59956	0.0215686	0.294582	0.887	778	tags=46%, list=4%, signal=48%
GO_CLATHRIN_ADAPTOR_COMPLEX	25	0.481411	1.61827	0.0261044	0.325992	0.855	7419	tags=60%, list=38%, signal=96%
GO_INTRINSIC_COMPONENT_OF_MITOCHONDRIAL_OUTER_MEMBRANE	21	0.503809	1.58181	0.0316832	0.294229	0.905	2031	tags=33%, list=10%, signal=37%
GO_ANAPHASE_PROMOTING_COMPLEX	21	0.641661	1.54345	0.0495238	0.307234	0.956	2299	tags=29%, list=12%, signal=32%
GO_U2_SNRNP	20	0.659121	1.61697	0.0479846	0.314074	0.857	4554	tags=60%, list=23%, signal=78%
GO_GERM_CELL_NUCLEUS	17	0.625133	1.56178	0.0233918	0.324117	0.939	2274	tags=29%, list=12%, signal=33%
GO_PRONUCLEUS	16	0.720653	1.60426	0.0213178	0.294312	0.877	2678	tags=44%, list=14%, signal=51%
GO_NURD_COMPLEX	15	0.625162	1.76031	0.00793651	0.579131	0.419	5785	tags=73%, list=30%, signal=104%
GO_CONDENSED_NUCLEAR_CHROMOSOME_KINETOCHORE	15	0.873468	1.54193	0.0193798	0.303151	0.956	559	tags=60%, list=3%, signal=62%
GO_SPINDLE_POLE_CENTROSOME	15	0.666214	1.55703	0.0407767	0.325257	0.942	2853	tags=40%, list=15%, signal=47%
GO_BLOC_1_COMPLEX	15	0.610047	1.52246	0.0453649	0.317189	0.974	4727	tags=47%, list=24%, signal=61%
Biological process (156 terms)
GO_ORGANELLE_FISSION	444	0.512244	1.63004	0.00978474	0.33047	0.993	3020	tags=32%, list=15%, signal=37%
GO_REGULATION_OF_CELL_CYCLE_PHASE_TRANSITION	438	0.463825	1.66879	0.00972763	0.327215	0.983	3974	tags=34%, list=20%, signal=42%
GO_ESTABLISHMENT_OF_ORGANELLE_LOCALIZATION	403	0.374711	1.52764	0.00809717	0.36777	1	3873	tags=28%, list=20%, signal=34%
GO_POSITIVE_REGULATION_OF_CELL_CYCLE	371	0.432843	1.51666	0.0197628	0.37731	1	3128	tags=28%, list=16%, signal=32%
GO_NEGATIVE_REGULATION_OF_CELL_CYCLE_PROCESS	323	0.455005	1.66362	0.00959693	0.337465	0.984	3974	tags=34%, list=20%, signal=42%
GO_POSITIVE_REGULATION_OF_CELLULAR_PROTEIN_LOCALIZATION	320	0.333268	1.33572	0.0362173	0.598143	1	3216	tags=26%, list=16%, signal=31%
GO_CHROMOSOME_SEGREGATION	313	0.592639	1.68909	0.00970874	0.353691	0.967	1725	tags=27%, list=9%, signal=30%
GO_NEGATIVE_REGULATION_OF_MITOTIC_CELL_CYCLE	310	0.455974	1.64686	0.00967118	0.325822	0.992	4332	tags=37%, list=22%, signal=46%
GO_PROTEIN_CONTAINING_COMPLEX_LOCALIZATION	285	0.371481	1.59101	0.0140562	0.301099	0.997	4777	tags=34%, list=24%, signal=44%
GO_POSITIVE_REGULATION_OF_CELL_CYCLE_PROCESS	280	0.484038	1.57575	0.021611	0.32093	1	3695	tags=34%, list=19%, signal=42%
GO_MICROTUBULE_BASED_MOVEMENT	280	0.393927	1.4502	0.0412371	0.453283	1	4878	tags=39%, list=25%, signal=51%
GO_INTRINSIC_APOPTOTIC_SIGNALING_PATHWAY	279	0.353112	1.3795	0.0253165	0.535942	1	4195	tags=31%, list=21%, signal=39%
GO_DNA_RECOMBINATION	276	0.470043	1.58128	0.0313725	0.314085	0.999	3122	tags=31%, list=16%, signal=37%
GO_CELL_CYCLE_G2_M_PHASE_TRANSITION	264	0.52983	1.81479	0.00386847	0.744296	0.635	4332	tags=41%, list=22%, signal=51%
GO_SIGNAL_TRANSDUCTION_BY_P53_CLASS_MEDIATOR	264	0.415024	1.55656	0.0197239	0.344476	1	4708	tags=39%, list=24%, signal=51%
GO_PROTEIN_LOCALIZATION_TO_NUCLEUS	264	0.294836	1.29773	0.0435606	0.643786	1	3321	tags=23%, list=17%, signal=27%
GO_MITOTIC_NUCLEAR_DIVISION	261	0.580521	1.62797	0.0138614	0.31683	0.993	1771	tags=28%, list=9%, signal=30%
GO_CELL_CYCLE_G1_S_PHASE_TRANSITION	259	0.451753	1.5297	0.0309478	0.364464	1	2249	tags=26%, list=11%, signal=29%
GO_NUCLEAR_CHROMOSOME_SEGREGATION	254	0.599975	1.67201	0.0136452	0.332042	0.981	1617	tags=28%, list=8%, signal=30%
GO_DNA_CONFORMATION_CHANGE	247	0.542922	1.6256	0.0450098	0.314854	0.993	5236	tags=50%, list=27%, signal=68%
GO_MEIOTIC_CELL_CYCLE	242	0.525568	1.60888	0.0117417	0.303752	0.996	3063	tags=33%, list=16%, signal=38%
GO_NEGATIVE_REGULATION_OF_CELL_CYCLE_PHASE_TRANSITION	236	0.45966	1.63491	0.0228137	0.330564	0.992	4580	tags=39%, list=23%, signal=50%
GO_DOUBLE_STRAND_BREAK_REPAIR	234	0.494418	1.59865	0.0421456	0.298694	0.996	4271	tags=37%, list=22%, signal=47%
GO_CELL_CYCLE_ARREST	232	0.359909	1.37509	0.0391389	0.538913	1	3958	tags=31%, list=20%, signal=38%
GO_RNA_LOCALIZATION	228	0.407678	1.72578	0.0354331	0.420467	0.933	5468	tags=40%, list=28%, signal=55%
GO_CELL_CYCLE_CHECKPOINT	215	0.518729	1.56962	0.0313112	0.330342	1	3686	tags=37%, list=19%, signal=45%
GO_REGULATION_OF_RESPONSE_TO_DNA_DAMAGE_STIMULUS	213	0.415107	1.55434	0.0116732	0.345008	1	3465	tags=30%, list=18%, signal=36%
GO_PROTEIN_DNA_COMPLEX_SUBUNIT_ORGANIZATION	212	0.478683	1.68708	0.024952	0.350843	0.969	5446	tags=49%, list=28%, signal=67%
GO_REGULATION_OF_CELL_CYCLE_G2_M_PHASE_TRANSITION	208	0.552378	1.83648	0.00193798	1	0.549	4638	tags=45%, list=24%, signal=58%
GO_MEIOTIC_CELL_CYCLE_PROCESS	186	0.578853	1.68383	0.00584795	0.341639	0.972	3063	tags=38%, list=16%, signal=45%
GO_REGULATION_OF_NUCLEAR_DIVISION	185	0.53135	1.60174	0.0156863	0.303411	0.996	2719	tags=30%, list=14%, signal=35%
GO_SISTER_CHROMATID_SEGREGATION	180	0.650601	1.67092	0.0117188	0.327592	0.981	1725	tags=33%, list=9%, signal=36%
GO_REGULATION_OF_SIGNAL_TRANSDUCTION_BY_P53_CLASS_MEDIATOR	179	0.439519	1.65773	0.00200803	0.316621	0.986	5518	tags=46%, list=28%, signal=63%
GO_MEMBRANE_DOCKING	179	0.45316	1.67643	0.0100402	0.341851	0.98	4417	tags=38%, list=23%, signal=49%
GO_FERTILIZATION	178	0.35138	1.38851	0.0362903	0.522385	1	3216	tags=24%, list=16%, signal=29%
GO_CYTOKINESIS	170	0.469895	1.59389	0.0335306	0.299072	0.996	3289	tags=27%, list=17%, signal=32%
GO_SPINDLE_ORGANIZATION	168	0.55801	1.61537	0.0290135	0.299262	0.995	4161	tags=44%, list=21%, signal=55%
GO_REGULATION_OF_CELL_DIVISION	167	0.432001	1.37838	0.0398406	0.535873	1	2713	tags=27%, list=14%, signal=31%
GO_MITOTIC_CELL_CYCLE_CHECKPOINT	164	0.566696	1.64946	0.0174757	0.33029	0.991	2708	tags=35%, list=14%, signal=41%
GO_REGULATION_OF_INTRINSIC_APOPTOTIC_SIGNALING_PATHWAY	158	0.394643	1.42695	0.0314465	0.474639	1	4195	tags=33%, list=21%, signal=42%
GO_POSITIVE_REGULATION_OF_MITOTIC_CELL_CYCLE	149	0.485987	1.57643	0.0135922	0.324647	1	2841	tags=29%, list=14%, signal=33%
GO_MITOTIC_SISTER_CHROMATID_SEGREGATION	148	0.672213	1.65773	0.0214008	0.322953	0.986	1725	tags=34%, list=9%, signal=37%
GO_TELOMERE_ORGANIZATION	146	0.505123	1.71794	0.0214008	0.413826	0.94	6144	tags=58%, list=31%, signal=83%
GO_SINGLE_FERTILIZATION	145	0.368724	1.40601	0.0464646	0.496962	1	3216	tags=25%, list=16%, signal=29%
GO_DNA_PACKAGING	137	0.594165	1.69448	0.0213178	0.369231	0.962	3775	tags=43%, list=19%, signal=53%
GO_RECOMBINATIONAL_REPAIR	135	0.56219	1.62366	0.0311284	0.311151	0.994	2969	tags=37%, list=15%, signal=43%
GO_MICROTUBULE_CYTOSKELETON_ORGANIZATION_INVOLVED_IN_MITOSIS	133	0.623129	1.653	0.0137795	0.325133	0.991	1600	tags=31%, list=8%, signal=33%
GO_MICROTUBULE_ORGANIZING_CENTER_ORGANIZATION	133	0.489962	1.5499	0.0410156	0.343983	1	3877	tags=40%, list=20%, signal=49%
GO_SIGNAL_TRANSDUCTION_IN_RESPONSE_TO_DNA_DAMAGE	131	0.492386	1.6262	0.00579151	0.317659	0.993	2448	tags=33%, list=12%, signal=37%
GO_REGULATION_OF_DNA_TEMPLATED_TRANSCRIPTION_IN_RESPONSE_TO_STRESS	123	0.369166	1.4596	0.0492126	0.440646	1	4814	tags=34%, list=25%, signal=45%
GO_CHROMATIN_ASSEMBLY_OR_DISASSEMBLY	118	0.558574	1.69344	0.00792079	0.360996	0.962	5422	tags=57%, list=28%, signal=78%
GO_REGULATION_OF_PROTEIN_LOCALIZATION_TO_NUCLEUS	118	0.407009	1.45331	0.0270793	0.449771	1	3693	tags=34%, list=19%, signal=42%
GO_MEIOSIS_I_CELL_CYCLE_PROCESS	117	0.555864	1.58808	0.0177866	0.306511	0.997	3063	tags=36%, list=16%, signal=42%
GO_NUCLEOSOME_ORGANIZATION	111	0.578291	1.77906	0.0038835	0.555481	0.779	5213	tags=55%, list=27%, signal=74%
GO_SPINDLE_ASSEMBLY	107	0.564646	1.62008	0.0252427	0.301151	0.995	3956	tags=40%, list=20%, signal=50%
GO_MITOTIC_SPINDLE_ORGANIZATION	106	0.637468	1.64183	0.0175781	0.324902	0.992	1771	tags=33%, list=9%, signal=36%
GO_DNA_DAMAGE_RESPONSE_SIGNAL_TRANSDUCTION_BY_P53_CLASS_MEDIATOR	106	0.489025	1.55421	0.0196464	0.342629	1	2448	tags=34%, list=12%, signal=39%
GO_MITOTIC_DNA_INTEGRITY_CHECKPOINT	105	0.509261	1.53865	0.038835	0.352954	1	3686	tags=40%, list=19%, signal=49%
GO_REGULATION_OF_CYCLIN_DEPENDENT_PROTEIN_KINASE_ACTIVITY	100	0.506596	1.59562	0.0116732	0.297639	0.996	2078	tags=30%, list=11%, signal=33%
GO_NEGATIVE_REGULATION_OF_CELL_CYCLE_G2_M_PHASE_TRANSITION	99	0.525926	1.77626	0.0093633	0.508896	0.788	4638	tags=40%, list=24%, signal=53%
GO_REGULATION_OF_CHROMOSOME_SEGREGATION	99	0.68025	1.69515	0.0173077	0.37879	0.962	1550	tags=33%, list=8%, signal=36%
GO_POSITIVE_REGULATION_OF_RESPONSE_TO_DNA_DAMAGE_STIMULUS	99	0.403723	1.50609	0.0272374	0.389836	1	3401	tags=29%, list=17%, signal=35%
GO_CYTOSKELETON_DEPENDENT_CYTOKINESIS	98	0.520523	1.64287	0.0221774	0.333266	0.992	3693	tags=37%, list=19%, signal=45%
GO_CILIARY_BASAL_BODY_PLASMA_MEMBRANE_DOCKING	95	0.526528	1.61143	0.0418327	0.303378	0.996	5733	tags=58%, list=29%, signal=81%
GO_CHROMATIN_ASSEMBLY	93	0.599099	1.70243	0.0115385	0.390139	0.951	3422	tags=43%, list=17%, signal=52%
GO_NEGATIVE_REGULATION_OF_INTRINSIC_APOPTOTIC_SIGNALING_PATHWAY	93	0.429045	1.45246	0.039666	0.450211	1	2988	tags=28%, list=15%, signal=33%
GO_POSITIVE_REGULATION_OF_CELL_CYCLE_PHASE_TRANSITION	92	0.61432	1.78618	0.00392157	0.679171	0.743	1616	tags=32%, list=8%, signal=34%
GO_REGULATION_OF_CYTOKINESIS	89	0.566442	1.67506	0.0137255	0.329588	0.981	2507	tags=27%, list=13%, signal=31%
GO_CHROMOSOME_SEPARATION	88	0.650803	1.65928	0.0285714	0.324798	0.986	2600	tags=38%, list=13%, signal=43%
GO_RETROGRADE_VESICLE_MEDIATED_TRANSPORT_GOLGI_TO_ENDOPLASMIC_RETICULUM	86	0.497769	1.8612	0	1	0.458	1052	tags=16%, list=5%, signal=17%
GO_ANAPHASE_PROMOTING_COMPLEX_DEPENDENT_CATABOLIC_PROCESS	81	0.576832	1.60411	0.0342052	0.303733	0.996	4817	tags=46%, list=25%, signal=60%
GO_TELOMERE_MAINTENANCE_VIA_TELOMERE_LENGTHENING	80	0.471162	1.72774	0.0291829	0.434424	0.929	5851	tags=50%, list=30%, signal=71%
GO_REGULATION_OF_SISTER_CHROMATID_SEGREGATION	78	0.677608	1.70072	0.0133333	0.382763	0.952	1550	tags=33%, list=8%, signal=36%
GO_CHROMOSOME_LOCALIZATION	75	0.606706	1.68527	0.0155945	0.346558	0.971	1315	tags=25%, list=7%, signal=27%
GO_POSITIVE_REGULATION_OF_PROTEIN_LOCALIZATION_TO_NUCLEUS	74	0.447013	1.50081	0.016	0.393802	1	3216	tags=38%, list=16%, signal=45%
GO_RNA_DEPENDENT_DNA_BIOSYNTHETIC_PROCESS	70	0.48424	1.75879	0.0211946	0.42548	0.85	5618	tags=50%, list=29%, signal=70%
GO_MITOTIC_CYTOKINESIS	70	0.565237	1.64131	0.0295276	0.321165	0.992	1617	tags=27%, list=8%, signal=29%
GO_GLYCOLIPID_BIOSYNTHETIC_PROCESS	66	0.406673	1.4118	0.0329218	0.48836	1	3451	tags=30%, list=18%, signal=37%
GO_REGULATION_OF_CHROMOSOME_SEPARATION	61	0.687917	1.64793	0.0320151	0.328334	0.992	1550	tags=36%, list=8%, signal=39%
GO_REGULATION_OF_TELOMERE_MAINTENANCE_VIA_TELOMERE_LENGTHENING	61	0.473971	1.66107	0.0351562	0.332001	0.985	3822	tags=33%, list=19%, signal=41%
GO_NEGATIVE_REGULATION_OF_NUCLEAR_DIVISION	59	0.649422	1.6156	0.0326923	0.302339	0.995	1905	tags=36%, list=10%, signal=39%
GO_REGULATION_OF_CENTROSOME_CYCLE	58	0.532752	1.63402	0.00972763	0.328148	0.992	2853	tags=36%, list=15%, signal=42%
GO_MITOTIC_SPINDLE_ASSEMBLY	57	0.653303	1.62946	0.0212355	0.322099	0.993	982	tags=25%, list=5%, signal=26%
GO_SPLICEOSOMAL_COMPLEX_ASSEMBLY	57	0.465024	1.66203	0.0443548	0.335998	0.985	6381	tags=54%, list=33%, signal=80%
GO_POSITIVE_REGULATION_OF_NEURON_APOPTOTIC_PROCESS	56	0.48547	1.62341	0.00404858	0.307698	0.994	4540	tags=41%, list=23%, signal=53%
GO_METAPHASE_PLATE_CONGRESSION	56	0.669803	1.72185	0.00770713	0.418072	0.935	1315	tags=30%, list=7%, signal=32%
GO_METAPHASE_ANAPHASE_TRANSITION_OF_CELL_CYCLE	56	0.692445	1.6291	0.0265152	0.318277	0.993	1550	tags=38%, list=8%, signal=41%
GO_SISTER_CHROMATID_COHESION	56	0.585678	1.53858	0.0377734	0.350616	1	1268	tags=25%, list=6%, signal=27%
GO_REGULATION_OF_UBIQUITIN_PROTEIN_TRANSFERASE_ACTIVITY	52	0.492249	1.63727	0.0122699	0.32878	0.992	1453	tags=23%, list=7%, signal=25%
GO_POSITIVE_REGULATION_OF_TELOMERE_MAINTENANCE	51	0.512405	1.76186	0.0158416	0.486509	0.842	4228	tags=39%, list=22%, signal=50%
GO_SPINDLE_LOCALIZATION	51	0.606354	1.6185	0.0254902	0.301881	0.995	3454	tags=43%, list=18%, signal=52%
GO_CORTICAL_CYTOSKELETON_ORGANIZATION	48	0.562663	1.50727	0.038	0.393653	1	4632	tags=40%, list=24%, signal=52%
GO_REGULATION_OF_TELOMERASE_ACTIVITY	47	0.532498	1.54983	0.0242424	0.341469	1	3822	tags=36%, list=19%, signal=45%
GO_NCRNA_3_END_PROCESSING	47	0.499663	1.59903	0.0320641	0.301003	0.996	4800	tags=43%, list=24%, signal=56%
GO_HISTONE_EXCHANGE	45	0.651321	1.56131	0.0469667	0.339369	1	3827	tags=56%, list=20%, signal=69%
GO_SNRNA_METABOLIC_PROCESS	44	0.499933	1.73745	0.0217822	0.414353	0.906	5795	tags=45%, list=30%, signal=64%
GO_NEGATIVE_REGULATION_OF_CHROMOSOME_SEGREGATION	44	0.718849	1.59944	0.0266667	0.306485	0.996	1453	tags=39%, list=7%, signal=42%
GO_MITOTIC_METAPHASE_PLATE_CONGRESSION	43	0.696875	1.73898	0.0113852	0.433753	0.905	1315	tags=33%, list=7%, signal=35%
GO_REGULATION_OF_CENTROSOME_DUPLICATION	43	0.490754	1.53449	0.0485437	0.357557	1	3597	tags=40%, list=18%, signal=48%
GO_RESPONSE_TO_TESTOSTERONE	40	0.508494	1.49989	0.00988142	0.394094	1	1588	tags=28%, list=8%, signal=30%
GO_POSITIVE_REGULATION_OF_CYTOKINESIS	40	0.626441	1.60918	0.0339321	0.306453	0.996	1271	tags=23%, list=6%, signal=24%
GO_CYTOKINETIC_PROCESS	39	0.627914	1.75216	0.00595238	0.426851	0.872	3447	tags=36%, list=18%, signal=43%
GO_ESTABLISHMENT_OF_SPINDLE_ORIENTATION	38	0.603299	1.61813	0.021611	0.298986	0.995	2791	tags=34%, list=14%, signal=40%
GO_NCRNA_EXPORT_FROM_NUCLEUS	38	0.614735	1.83586	0.0271845	0.764528	0.553	3630	tags=45%, list=19%, signal=55%
GO_POSITIVE_REGULATION_OF_TELOMERE_MAINTENANCE_VIA_TELOMERE_LENGTHENING	37	0.583504	1.78295	0.0039604	0.606072	0.759	3822	tags=43%, list=19%, signal=54%
GO_BINDING_OF_SPERM_TO_ZONA_PELLUCIDA	37	0.464161	1.53102	0.030426	0.363007	1	3216	tags=35%, list=16%, signal=42%
GO_NEGATIVE_REGULATION_OF_METAPHASE_ANAPHASE_TRANSITION_OF_CELL_CYCLE	37	0.728506	1.57552	0.0323194	0.318706	1	1453	tags=41%, list=7%, signal=44%
GO_NEUTRAL_AMINO_ACID_TRANSPORT	37	0.535985	1.40051	0.0469083	0.503408	1	2169	tags=38%, list=11%, signal=42%
GO_POSITIVE_REGULATION_OF_DNA_REPLICATION	37	0.560381	1.51665	0.0477099	0.374888	1	2277	tags=35%, list=12%, signal=40%
GO_POSITIVE_REGULATION_OF_TELOMERASE_ACTIVITY	36	0.532325	1.50414	0.0381526	0.391161	1	3822	tags=36%, list=19%, signal=45%
GO_SNRNA_PROCESSING	35	0.516804	1.69279	0.0237624	0.35193	0.962	5795	tags=46%, list=30%, signal=65%
GO_ESTABLISHMENT_OF_MITOTIC_SPINDLE_LOCALIZATION	35	0.642806	1.62251	0.0255403	0.305949	0.994	1315	tags=31%, list=7%, signal=34%
GO_ATTACHMENT_OF_SPINDLE_MICROTUBULES_TO_KINETOCHORE	33	0.749955	1.62206	0.0191205	0.303161	0.995	919	tags=39%, list=5%, signal=41%
GO_FEMALE_MEIOTIC_NUCLEAR_DIVISION	31	0.704349	1.70618	0.00581395	0.391104	0.948	3344	tags=55%, list=17%, signal=66%
GO_REGULATION_OF_MEIOTIC_NUCLEAR_DIVISION	31	0.626285	1.57344	0.0159681	0.32143	1	3460	tags=42%, list=18%, signal=51%
GO_RETINOIC_ACID_RECEPTOR_SIGNALING_PATHWAY	31	0.515323	1.47093	0.04	0.425723	1	1440	tags=19%, list=7%, signal=21%
GO_POSITIVE_REGULATION_OF_CELL_CYCLE_G2_M_PHASE_TRANSITION	30	0.759199	1.77607	0.0019802	0.459152	0.788	1426	tags=47%, list=7%, signal=50%
GO_G2_DNA_DAMAGE_CHECKPOINT	30	0.658084	1.68108	0.0115163	0.343545	0.979	835	tags=30%, list=4%, signal=31%
GO_MITOTIC_G2_M_TRANSITION_CHECKPOINT	29	0.704648	1.7067	0.00766283	0.405689	0.947	835	tags=31%, list=4%, signal=32%
GO_SNRNA_3_END_PROCESSING	29	0.565136	1.69936	0.0194175	0.374484	0.955	5349	tags=45%, list=27%, signal=62%
GO_REGULATION_OF_FERTILIZATION	28	0.582814	1.57614	0.0244898	0.322686	1	817	tags=18%, list=4%, signal=19%
GO_PHAGOSOME_ACIDIFICATION	28	0.519293	1.56386	0.0436508	0.334877	1	6810	tags=68%, list=35%, signal=104%
GO_POSITIVE_REGULATION_OF_CHROMOSOME_SEGREGATION	27	0.672124	1.60545	0.0196078	0.302947	0.996	1550	tags=33%, list=8%, signal=36%
GO_ESTABLISHMENT_OF_PROTEIN_LOCALIZATION_TO_CHROMOSOME	24	0.621671	1.67899	0.0175439	0.34212	0.98	5463	tags=71%, list=28%, signal=98%
GO_REGULATION_OF_DENDRITE_EXTENSION	24	0.616436	1.47868	0.0253165	0.410622	1	3412	tags=38%, list=17%, signal=45%
GO_MEIOTIC_CHROMOSOME_SEPARATION	24	0.669193	1.55627	0.0331384	0.342442	1	2807	tags=42%, list=14%, signal=49%
GO_SYNAPTONEMAL_COMPLEX_ORGANIZATION	23	0.570536	1.46404	0.0365854	0.433344	1	1077	tags=17%, list=5%, signal=18%
GO_MITOTIC_CYTOKINETIC_PROCESS	23	0.538511	1.59762	0.0383065	0.295438	0.996	4549	tags=35%, list=23%, signal=45%
GO_MITOTIC_SISTER_CHROMATID_COHESION	22	0.661848	1.6062	0.0235756	0.304129	0.996	2627	tags=32%, list=13%, signal=37%
GO_REGULATION_OF_UBIQUITIN_PROTEIN_LIGASE_ACTIVITY	22	0.645207	1.53191	0.0414201	0.36293	1	1453	tags=36%, list=7%, signal=39%
GO_PROTEIN_LOCALIZATION_TO_CHROMOSOME_CENTROMERIC_REGION	21	0.786774	1.56938	0.0137525	0.328093	1	1616	tags=48%, list=8%, signal=52%
GO_REGULATION_OF_COLLATERAL_SPROUTING	20	0.677171	1.46211	0.0243902	0.43495	1	1729	tags=30%, list=9%, signal=33%
GO_CHROMATIN_DISASSEMBLY	19	0.662262	1.78755	0.00206186	0.802938	0.739	4944	tags=63%, list=25%, signal=84%
GO_PROTEIN_DNA_COMPLEX_DISASSEMBLY	19	0.635569	1.71085	0.00814664	0.406176	0.946	5446	tags=63%, list=28%, signal=87%
GO_TELOMERASE_RNA_LOCALIZATION	19	0.666515	1.74122	0.0180361	0.450567	0.903	5618	tags=79%, list=29%, signal=111%
GO_MITOTIC_G2_DNA_DAMAGE_CHECKPOINT	19	0.641462	1.58549	0.0287356	0.310772	0.998	835	tags=26%, list=4%, signal=27%
GO_SPERMATID_NUCLEUS_DIFFERENTIATION	19	0.534402	1.67638	0.0341365	0.333502	0.98	6384	tags=53%, list=33%, signal=78%
GO_SYNAPTIC_VESICLE_CYTOSKELETAL_TRANSPORT	19	0.522617	1.56563	0.0366599	0.3325	1	6211	tags=58%, list=32%, signal=85%
GO_ESTABLISHMENT_OF_PROTEIN_LOCALIZATION_TO_TELOMERE	18	0.702388	1.7616	0.00574713	0.447355	0.842	3216	tags=67%, list=16%, signal=80%
GO_REGULATION_OF_EARLY_ENDOSOME_TO_LATE_ENDOSOME_TRANSPORT	18	0.620672	1.71459	0.0123711	0.408426	0.943	4637	tags=56%, list=24%, signal=73%
GO_PROTEIN_LOCALIZATION_TO_KINETOCHORE	17	0.817462	1.54022	0.00986193	0.353497	1	1616	tags=53%, list=8%, signal=58%
GO_REGULATION_OF_INTRINSIC_APOPTOTIC_SIGNALING_PATHWAY_IN_RESPONSE_TO_DNA_DAMAGE_BY_P53_CLASS_MEDIATOR	17	0.622716	1.6204	0.0198413	0.304218	0.995	2323	tags=41%, list=12%, signal=47%
GO_MESODERMAL_CELL_FATE_COMMITMENT	17	0.692588	1.48109	0.0319361	0.414411	1	1353	tags=35%, list=7%, signal=38%
GO_POSITIVE_REGULATION_OF_TELOMERE_CAPPING	17	0.647806	1.54691	0.0337302	0.344097	1	3822	tags=47%, list=19%, signal=58%
GO_HISTONE_H3_K27_METHYLATION	16	0.674385	1.63314	0.0135922	0.325262	0.992	3721	tags=50%, list=19%, signal=62%
GO_REGULATION_OF_RETINOIC_ACID_RECEPTOR_SIGNALING_PATHWAY	16	0.682387	1.59788	0.0151188	0.297612	0.996	1440	tags=38%, list=7%, signal=40%
GO_MEMBRANE_DISASSEMBLY	16	0.696508	1.62457	0.0245747	0.313017	0.994	202	tags=25%, list=1%, signal=25%
GO_NEGATIVE_REGULATION_OF_UBIQUITIN_PROTEIN_TRANSFERASE_ACTIVITY	16	0.591749	1.5841	0.0383838	0.312049	0.998	1453	tags=31%, list=7%, signal=34%
GO_KINETOCHORE_ASSEMBLY	16	0.738458	1.49967	0.0416667	0.39243	1	2807	tags=56%, list=14%, signal=66%
GO_SEQUESTERING_OF_METAL_ION	15	0.73034	1.50387	0.0207039	0.387197	1	3008	tags=67%, list=15%, signal=79%
GO_CENTROSOME_SEPARATION	15	0.679459	1.56683	0.0263653	0.33205	1	2719	tags=53%, list=14%, signal=62%
GO_POSITIVE_REGULATION_OF_TELOMERASE_RNA_LOCALIZATION_TO_CAJAL_BODY	15	0.691419	1.6608	0.0283976	0.325945	0.985	3924	tags=73%, list=20%, signal=92%
GO_DNA_UNWINDING_INVOLVED_IN_DNA_REPLICATION	15	0.787762	1.59162	0.0326296	0.302512	0.996	1275	tags=53%, list=7%, signal=57%
GO_POSITIVE_REGULATION_OF_FERTILIZATION	15	0.608457	1.47423	0.0422535	0.422265	1	817	tags=20%, list=4%, signal=21%
GO_MITOTIC_DNA_REPLICATION	15	0.786803	1.50849	0.0426357	0.392455	1	2331	tags=60%, list=12%, signal=68%
GO_OTIC_VESICLE_DEVELOPMENT	15	0.633614	1.41736	0.0489237	0.488838	1	1439	tags=40%, list=7%, signal=43%
Molecular function (20 terms)
GO_OLFACTORY_RECEPTOR_ACTIVITY	375	0.265237	1.41319	0.0446247	0.813001	1	11635	tags=94%, list=59%, signal=228%
GO_TUBULIN_BINDING	335	0.391939	1.41937	0.012605	0.806762	1	2718	tags=24%, list=14%, signal=28%
GO_MICROTUBULE_BINDING	248	0.413492	1.43693	0.0208333	0.741631	1	1910	tags=21%, list=10%, signal=23%
GO_SINGLE_STRANDED_DNA_BINDING	113	0.491404	1.65377	0.0289256	0.481181	0.854	3704	tags=37%, list=19%, signal=46%
GO_MICROTUBULE_MOTOR_ACTIVITY	83	0.525787	1.49513	0.0428266	0.737721	0.998	3971	tags=43%, list=20%, signal=54%
GO_NUCLEOSOME_BINDING	55	0.480098	1.60825	0.0356394	0.656725	0.929	6591	tags=56%, list=34%, signal=85%
GO_CYCLIN_DEPENDENT_PROTEIN_SERINE_THREONINE_KINASE_REGULATOR_ACTIVITY	47	0.619471	1.76016	0	0.553865	0.483	2588	tags=40%, list=13%, signal=46%
GO_KINESIN_BINDING	42	0.497557	1.46611	0.0342612	0.670703	0.999	1619	tags=26%, list=8%, signal=28%
GO_UBIQUITIN_LIKE_PROTEIN_CONJUGATING_ENZYME_ACTIVITY	41	0.448702	1.67161	0.0330097	0.467048	0.793	3887	tags=32%, list=20%, signal=39%
GO_STRUCTURAL_CONSTITUENT_OF_NUCLEAR_PORE	27	0.599002	1.7242	0.0286299	0.410904	0.611	3190	tags=37%, list=16%, signal=44%
GO_GAMMA_TUBULIN_BINDING	26	0.567083	1.71258	0	0.372889	0.657	3078	tags=38%, list=16%, signal=46%
GO_METHYL_CPG_BINDING	26	0.599859	1.72658	0.0118343	0.534663	0.604	2057	tags=27%, list=10%, signal=30%
GO_NUCLEOSOMAL_DNA_BINDING	24	0.604687	1.76791	0.00785855	1	0.456	6068	tags=63%, list=31%, signal=90%
GO_DNA_REPLICATION_ORIGIN_BINDING	24	0.788981	1.57416	0.012685	0.598849	0.964	2027	tags=58%, list=10%, signal=65%
GO_CYSTEINE_TYPE_ENDOPEPTIDASE_INHIBITOR_ACTIVITY_INVOLVED_IN_APOPTOTIC_PROCESS	24	0.610213	1.46782	0.0246407	0.689976	0.999	2864	tags=38%, list=15%, signal=44%
GO_DNA_SECONDARY_STRUCTURE_BINDING	24	0.67038	1.60143	0.0346939	0.617434	0.938	3219	tags=50%, list=16%, signal=60%
GO_DNA_BINDING_BENDING	20	0.612247	1.48893	0.0458333	0.701182	0.998	2764	tags=30%, list=14%, signal=35%
GO_HISTONE_KINASE_ACTIVITY	17	0.743326	1.58499	0.0169133	0.589459	0.956	1239	tags=41%, list=6%, signal=44%
GO_SINGLE_STRANDED_DNA_HELICASE_ACTIVITY	17	0.780653	1.46919	0.0375783	0.711912	0.999	2198	tags=65%, list=11%, signal=73%
GO_3_5_DNA_HELICASE_ACTIVITY	15	0.818723	1.52887	0.022449	0.712457	0.995	2027	tags=67%, list=10%, signal=74%

## Sheet: Low 
Table S4. Gene set enrichment analyses between high and low immunoscore group in 342 TCGA-LIHC samples
Terms enriched in low immunoscore group
NAME	SIZE	ES	NES	NOM p-val	FDR q-val	FWER p-val	RANK AT MAX	LEADING EDGE
KEGG pathways (22 terms)
KEGG_INSULIN_SIGNALING_PATHWAY	137	-0.425722	-1.56536	0.00851064	0.260237	0.648	2251	tags=19%, list=11%, signal=21%
KEGG_VASCULAR_SMOOTH_MUSCLE_CONTRACTION	115	-0.498805	-1.48571	0.0398323	0.265209	0.822	2659	tags=30%, list=14%, signal=35%
KEGG_PEROXISOME	78	-0.685372	-1.60056	0.0313112	0.466195	0.552	3092	tags=56%, list=16%, signal=67%
KEGG_DRUG_METABOLISM_CYTOCHROME_P450	70	-0.72631	-1.41592	0.040568	0.357794	0.931	1675	tags=57%, list=9%, signal=62%
KEGG_COMPLEMENT_AND_COAGULATION_CASCADES	69	-0.78504	-1.59053	0.00632911	0.342926	0.578	1956	tags=65%, list=10%, signal=72%
KEGG_PPAR_SIGNALING_PATHWAY	69	-0.688422	-1.54999	0.00803213	0.227694	0.692	1353	tags=46%, list=7%, signal=50%
KEGG_ADIPOCYTOKINE_SIGNALING_PATHWAY	67	-0.533915	-1.55875	0.014433	0.251259	0.661	1640	tags=25%, list=8%, signal=28%
KEGG_VALINE_LEUCINE_AND_ISOLEUCINE_DEGRADATION	44	-0.70566	-1.55792	0.0435685	0.231792	0.666	2428	tags=70%, list=12%, signal=80%
KEGG_LYSINE_DEGRADATION	44	-0.590092	-1.58581	0.0486815	0.306602	0.598	2342	tags=39%, list=12%, signal=44%
KEGG_FATTY_ACID_METABOLISM	42	-0.797406	-1.57034	0.0143149	0.275923	0.631	2534	tags=79%, list=13%, signal=90%
KEGG_TYROSINE_METABOLISM	42	-0.670327	-1.52388	0.0305499	0.246034	0.746	2306	tags=50%, list=12%, signal=57%
KEGG_ALDOSTERONE_REGULATED_SODIUM_REABSORPTION	42	-0.475921	-1.40085	0.0435685	0.362624	0.945	1994	tags=31%, list=10%, signal=34%
KEGG_TRYPTOPHAN_METABOLISM	40	-0.739126	-1.61612	0.00609756	0.541736	0.504	2342	tags=63%, list=12%, signal=71%
KEGG_CYSTEINE_AND_METHIONINE_METABOLISM	34	-0.609993	-1.53528	0.0344828	0.240998	0.725	1031	tags=32%, list=5%, signal=34%
KEGG_PROPANOATE_METABOLISM	32	-0.722854	-1.62154	0.0265849	0.777092	0.493	2442	tags=63%, list=12%, signal=71%
KEGG_GLYCINE_SERINE_AND_THREONINE_METABOLISM	31	-0.837994	-1.59115	0.00406504	0.409729	0.576	1914	tags=74%, list=10%, signal=82%
KEGG_HISTIDINE_METABOLISM	29	-0.730138	-1.66417	0.00202429	1	0.387	2342	tags=62%, list=12%, signal=70%
KEGG_LINOLEIC_ACID_METABOLISM	29	-0.750517	-1.58163	0.010142	0.278817	0.606	919	tags=41%, list=5%, signal=43%
KEGG_PROXIMAL_TUBULE_BICARBONATE_RECLAMATION	23	-0.651515	-1.45317	0.0293501	0.305381	0.884	1163	tags=43%, list=6%, signal=46%
KEGG_BETA_ALANINE_METABOLISM	22	-0.708569	-1.51676	0.0414938	0.244385	0.76	2581	tags=73%, list=13%, signal=84%
KEGG_PRIMARY_BILE_ACID_BIOSYNTHESIS	16	-0.894444	-1.50036	0.00625	0.24991	0.801	1153	tags=81%, list=6%, signal=86%
KEGG_GLYOXYLATE_AND_DICARBOXYLATE_METABOLISM	16	-0.658171	-1.50879	0.0460251	0.244372	0.776	1090	tags=38%, list=6%, signal=40%
Cellular component (11 terms)
GO_MICROBODY	133	-0.623439	-1.68692	0.015873	0.879558	0.661	2564	tags=42%, list=13%, signal=48%
GO_BLOOD_MICROPARTICLE	113	-0.665967	-1.55009	0.0433925	0.884956	0.955	2571	tags=56%, list=13%, signal=64%
GO_MICROBODY_LUMEN	51	-0.789054	-1.71894	0	1	0.561	2444	tags=65%, list=12%, signal=74%
GO_MULTIVESICULAR_BODY	49	-0.524478	-1.52334	0.0348162	0.795306	0.971	3573	tags=41%, list=18%, signal=50%
GO_PROTEIN_LIPID_COMPLEX	38	-0.746118	-1.51556	0.0318091	0.744031	0.976	2155	tags=63%, list=11%, signal=71%
GO_HIGH_DENSITY_LIPOPROTEIN_PARTICLE	26	-0.81689	-1.462	0.0456349	0.785901	0.991	2155	tags=81%, list=11%, signal=91%
GO_ENDOPLASMIC_RETICULUM_EXIT_SITE	25	-0.597708	-1.67709	0.0214844	0.638166	0.688	1752	tags=28%, list=9%, signal=31%
GO_GOLGI_CIS_CISTERNA	25	-0.522132	-1.60135	0.0417495	0.894183	0.861	6412	tags=72%, list=33%, signal=107%
GO_MYOSIN_FILAMENT	22	-0.590694	-1.4413	0.0481696	0.825322	0.995	2130	tags=32%, list=11%, signal=36%
GO_PLATELET_DENSE_GRANULE	21	-0.699647	-1.52754	0.021611	0.885791	0.969	1212	tags=48%, list=6%, signal=51%
GO_INTRINSIC_COMPONENT_OF_PEROXISOMAL_MEMBRANE	15	-0.589008	-1.48783	0.03861	0.802134	0.989	2990	tags=33%, list=15%, signal=39%
Biological process (236 terms)
GO_PURINE_CONTAINING_COMPOUND_METABOLIC_PROCESS	457	-0.401673	-1.43351	0.0319361	0.543123	1	2105	tags=23%, list=11%, signal=25%
GO_SMALL_MOLECULE_CATABOLIC_PROCESS	437	-0.58317	-1.57615	0.0203666	0.672417	0.999	2581	tags=44%, list=13%, signal=50%
GO_RESPONSE_TO_PEPTIDE_HORMONE	427	-0.384635	-1.43812	0.00798403	0.546514	1	2673	tags=24%, list=14%, signal=27%
GO_POSITIVE_REGULATION_OF_CATABOLIC_PROCESS	426	-0.320622	-1.36132	0.0456349	0.579699	1	3612	tags=26%, list=18%, signal=31%
GO_REGULATION_OF_SMALL_MOLECULE_METABOLIC_PROCESS	418	-0.374029	-1.38677	0.0360721	0.561864	1	1898	tags=19%, list=10%, signal=21%
GO_RIBOSE_PHOSPHATE_METABOLIC_PROCESS	418	-0.382723	-1.41402	0.0440882	0.5519	1	2105	tags=22%, list=11%, signal=24%
GO_GLYCEROLIPID_METABOLIC_PROCESS	403	-0.391041	-1.42505	0.0277778	0.545417	1	2733	tags=23%, list=14%, signal=26%
GO_REGULATION_OF_LIPID_METABOLIC_PROCESS	396	-0.462229	-1.52005	0.012024	0.536556	1	3017	tags=35%, list=15%, signal=41%
GO_LIPID_LOCALIZATION	392	-0.44791	-1.40902	0.0339321	0.555887	1	2930	tags=33%, list=15%, signal=38%
GO_RESPONSE_TO_STEROID_HORMONE	385	-0.407692	-1.44812	0.00972763	0.537771	1	2649	tags=26%, list=14%, signal=30%
GO_CELLULAR_RESPONSE_TO_PEPTIDE	373	-0.383516	-1.43703	0.0136986	0.543583	1	3073	tags=25%, list=16%, signal=29%
GO_ALCOHOL_METABOLIC_PROCESS	368	-0.504165	-1.52205	0.0295276	0.541137	1	2575	tags=32%, list=13%, signal=37%
GO_FATTY_ACID_METABOLIC_PROCESS	366	-0.591126	-1.62762	0.011976	0.649825	0.992	2576	tags=42%, list=13%, signal=47%
GO_SULFUR_COMPOUND_METABOLIC_PROCESS	366	-0.468937	-1.49727	0.0215686	0.538345	1	2105	tags=29%, list=11%, signal=32%
GO_RESPONSE_TO_METAL_ION	363	-0.377529	-1.27995	0.0440882	0.663019	1	2568	tags=26%, list=13%, signal=30%
GO_POSITIVE_REGULATION_OF_CELLULAR_CATABOLIC_PROCESS	362	-0.331309	-1.38641	0.0422535	0.559533	1	3473	tags=25%, list=18%, signal=30%
GO_ORGANIC_ACID_BIOSYNTHETIC_PROCESS	337	-0.538589	-1.50941	0.019802	0.529042	1	2077	tags=34%, list=11%, signal=37%
GO_LIPID_CATABOLIC_PROCESS	326	-0.527545	-1.54266	0.0178926	0.570043	1	2564	tags=38%, list=13%, signal=43%
GO_STEROID_METABOLIC_PROCESS	321	-0.564534	-1.52343	0.0260521	0.544588	1	2350	tags=37%, list=12%, signal=41%
GO_CELLULAR_AMINO_ACID_METABOLIC_PROCESS	313	-0.560966	-1.53168	0.036961	0.545934	1	2443	tags=36%, list=12%, signal=41%
GO_CELLULAR_RESPONSE_TO_PEPTIDE_HORMONE_STIMULUS	312	-0.409779	-1.55149	0	0.604658	1	3060	tags=26%, list=16%, signal=30%
GO_NEGATIVE_REGULATION_OF_CATABOLIC_PROCESS	304	-0.289082	-1.26182	0.0482897	0.683843	1	2507	tags=16%, list=13%, signal=18%
GO_RESPONSE_TO_XENOBIOTIC_STIMULUS	285	-0.57067	-1.58977	0.00401606	0.658137	0.998	1689	tags=34%, list=9%, signal=36%
GO_CELLULAR_CARBOHYDRATE_METABOLIC_PROCESS	276	-0.431189	-1.4948	0.0140845	0.531154	1	2260	tags=24%, list=12%, signal=27%
GO_ORGANIC_ACID_CATABOLIC_PROCESS	269	-0.701214	-1.66227	0.00813008	0.543674	0.983	2564	tags=58%, list=13%, signal=66%
GO_RESPONSE_TO_INSULIN	265	-0.373989	-1.44967	0.0179283	0.545114	1	2369	tags=22%, list=12%, signal=24%
GO_ORGANIC_HYDROXY_COMPOUND_BIOSYNTHETIC_PROCESS	260	-0.458822	-1.43573	0.0257937	0.543792	1	2575	tags=30%, list=13%, signal=34%
GO_COENZYME_METABOLIC_PROCESS	253	-0.545118	-1.52835	0.0423387	0.536471	1	2596	tags=37%, list=13%, signal=42%
GO_CELLULAR_RESPONSE_TO_STEROID_HORMONE_STIMULUS	248	-0.421653	-1.54669	0.00200401	0.581148	1	2649	tags=25%, list=14%, signal=29%
GO_GLYCEROLIPID_BIOSYNTHETIC_PROCESS	246	-0.374739	-1.40975	0.014	0.557224	1	2723	tags=22%, list=14%, signal=25%
GO_LIPID_MODIFICATION	236	-0.539956	-1.66343	0.00409836	0.554323	0.983	2564	tags=36%, list=13%, signal=41%
GO_CARBOHYDRATE_HOMEOSTASIS	233	-0.406999	-1.41796	0.0116505	0.556599	1	2104	tags=23%, list=11%, signal=25%
GO_HORMONE_MEDIATED_SIGNALING_PATHWAY	231	-0.404109	-1.53781	0.00585938	0.553205	1	2649	tags=22%, list=14%, signal=25%
GO_MONOCARBOXYLIC_ACID_BIOSYNTHETIC_PROCESS	221	-0.534306	-1.46205	0.0356436	0.560232	1	1825	tags=33%, list=9%, signal=36%
GO_CELLULAR_RESPONSE_TO_INSULIN_STIMULUS	210	-0.372381	-1.45774	0.0178571	0.551222	1	2369	tags=21%, list=12%, signal=24%
GO_FAT_CELL_DIFFERENTIATION	210	-0.432679	-1.43512	0.0194175	0.543797	1	2674	tags=29%, list=14%, signal=33%
GO_CELLULAR_LIPID_CATABOLIC_PROCESS	210	-0.586509	-1.60838	0.0258964	0.677118	0.996	2618	tags=45%, list=13%, signal=51%
GO_CARBOHYDRATE_BIOSYNTHETIC_PROCESS	208	-0.409208	-1.43341	0.011811	0.541205	1	2293	tags=25%, list=12%, signal=28%
GO_GLUCOSE_METABOLIC_PROCESS	206	-0.488671	-1.61293	0.00403226	0.664075	0.995	1881	tags=28%, list=10%, signal=30%
GO_AMMONIUM_ION_METABOLIC_PROCESS	205	-0.441318	-1.39236	0.0337302	0.551129	1	2028	tags=26%, list=10%, signal=29%
GO_REGULATION_OF_CARBOHYDRATE_METABOLIC_PROCESS	200	-0.416634	-1.53635	0.00411523	0.544553	1	1881	tags=21%, list=10%, signal=23%
GO_ALPHA_AMINO_ACID_METABOLIC_PROCESS	195	-0.635752	-1.5369	0.0306122	0.552657	1	2443	tags=50%, list=12%, signal=56%
GO_STEROID_BIOSYNTHETIC_PROCESS	193	-0.519085	-1.46395	0.0424242	0.558564	1	2906	tags=37%, list=15%, signal=43%
GO_REGULATION_OF_LIPID_BIOSYNTHETIC_PROCESS	187	-0.459044	-1.45073	0.0436508	0.546467	1	2910	tags=33%, list=15%, signal=39%
GO_RESPONSE_TO_STARVATION	185	-0.383027	-1.41785	0.0141414	0.554701	1	2559	tags=26%, list=13%, signal=30%
GO_STEROID_HORMONE_MEDIATED_SIGNALING_PATHWAY	181	-0.397842	-1.45921	0.018	0.556886	1	2649	tags=24%, list=14%, signal=27%
GO_CELLULAR_RESPONSE_TO_XENOBIOTIC_STIMULUS	177	-0.643007	-1.56925	0.0142276	0.670021	1	1689	tags=42%, list=9%, signal=46%
GO_MONOCARBOXYLIC_ACID_TRANSPORT	165	-0.53762	-1.49435	0.00968992	0.52608	1	2403	tags=36%, list=12%, signal=41%
GO_RESPONSE_TO_CORTICOSTEROID	163	-0.476007	-1.47366	0.00784314	0.555887	1	2910	tags=35%, list=15%, signal=41%
GO_STEROL_METABOLIC_PROCESS	161	-0.57491	-1.51879	0.0422535	0.537621	1	1870	tags=34%, list=10%, signal=37%
GO_FATTY_ACID_DERIVATIVE_METABOLIC_PROCESS	161	-0.522503	-1.42376	0.0460922	0.548094	1	2079	tags=32%, list=11%, signal=36%
GO_RESPONSE_TO_PURINE_CONTAINING_COMPOUND	151	-0.484845	-1.49297	0.00956023	0.524873	1	2393	tags=30%, list=12%, signal=34%
GO_POSITIVE_REGULATION_OF_LIPID_METABOLIC_PROCESS	142	-0.52756	-1.56024	0.0155642	0.654011	1	3062	tags=38%, list=16%, signal=45%
GO_NEUROTRANSMITTER_METABOLIC_PROCESS	141	-0.566913	-1.55775	0.00622407	0.624558	1	2059	tags=33%, list=11%, signal=37%
GO_NUCLEOSIDE_BISPHOSPHATE_METABOLIC_PROCESS	139	-0.568835	-1.55052	0.0223124	0.602172	1	2105	tags=37%, list=11%, signal=42%
GO_REGULATION_OF_CELLULAR_CARBOHYDRATE_METABOLIC_PROCESS	138	-0.522304	-1.69744	0	0.665178	0.951	1881	tags=28%, list=10%, signal=30%
GO_POSITIVE_REGULATION_OF_SMALL_MOLECULE_METABOLIC_PROCESS	137	-0.480115	-1.50783	0.00976562	0.528049	1	2910	tags=34%, list=15%, signal=40%
GO_DRUG_CATABOLIC_PROCESS	137	-0.621316	-1.50545	0.04	0.526341	1	1740	tags=40%, list=9%, signal=44%
GO_LIPID_HOMEOSTASIS	136	-0.599933	-1.56836	0.0258964	0.645194	1	2267	tags=40%, list=12%, signal=45%
GO_INSULIN_RECEPTOR_SIGNALING_PATHWAY	136	-0.359009	-1.40419	0.0276134	0.551212	1	1994	tags=19%, list=10%, signal=21%
GO_RESPONSE_TO_ORGANOPHOSPHORUS	135	-0.478509	-1.44884	0.0285714	0.542808	1	2393	tags=30%, list=12%, signal=34%
GO_LIPOPROTEIN_METABOLIC_PROCESS	130	-0.444858	-1.49983	0.0357853	0.534972	1	2871	tags=26%, list=15%, signal=30%
GO_MONOCARBOXYLIC_ACID_CATABOLIC_PROCESS	128	-0.737328	-1.71119	0.00595238	0.735446	0.933	2564	tags=63%, list=13%, signal=71%
GO_CELLULAR_AMINO_ACID_CATABOLIC_PROCESS	122	-0.724937	-1.56542	0.0164609	0.643001	1	2502	tags=64%, list=13%, signal=73%
GO_REGULATION_OF_FAT_CELL_DIFFERENTIATION	122	-0.432993	-1.38311	0.0495238	0.558668	1	2616	tags=29%, list=13%, signal=33%
GO_NEUTRAL_LIPID_METABOLIC_PROCESS	121	-0.63167	-1.60003	0.0123457	0.671368	0.998	1651	tags=36%, list=8%, signal=39%
GO_ENDOTHELIUM_DEVELOPMENT	119	-0.577132	-1.67281	0.0115607	0.599391	0.977	3650	tags=46%, list=19%, signal=56%
GO_XENOBIOTIC_METABOLIC_PROCESS	119	-0.676395	-1.49243	0.032	0.517187	1	1098	tags=45%, list=6%, signal=47%
GO_REGULATION_OF_STEROID_METABOLIC_PROCESS	116	-0.510033	-1.46477	0.0455487	0.567637	1	2969	tags=36%, list=15%, signal=42%
GO_REGULATION_OF_GLUCOSE_METABOLIC_PROCESS	113	-0.550423	-1.69772	0	0.702186	0.951	1881	tags=30%, list=10%, signal=33%
GO_RESPONSE_TO_ALKALOID	111	-0.383909	-1.32442	0.0429688	0.611308	1	1782	tags=18%, list=9%, signal=20%
GO_POLYSACCHARIDE_METABOLIC_PROCESS	108	-0.466572	-1.53656	0.0056926	0.54898	1	2293	tags=28%, list=12%, signal=31%
GO_ICOSANOID_METABOLIC_PROCESS	108	-0.552435	-1.42813	0.0429688	0.543178	1	2062	tags=33%, list=11%, signal=37%
GO_LONG_CHAIN_FATTY_ACID_METABOLIC_PROCESS	105	-0.627142	-1.54322	0.0235756	0.573491	1	1805	tags=40%, list=9%, signal=44%
GO_THIOESTER_METABOLIC_PROCESS	105	-0.583579	-1.55151	0.028	0.61188	1	1875	tags=36%, list=10%, signal=40%
GO_FATTY_ACID_CATABOLIC_PROCESS	104	-0.742855	-1.75782	0.0019802	1	0.832	2564	tags=61%, list=13%, signal=69%
GO_PHENOL_CONTAINING_COMPOUND_METABOLIC_PROCESS	104	-0.474314	-1.35365	0.0459082	0.593209	1	2404	tags=31%, list=12%, signal=35%
GO_ALPHA_AMINO_ACID_CATABOLIC_PROCESS	103	-0.735947	-1.54975	0.0184426	0.591845	1	2502	tags=66%, list=13%, signal=75%
GO_LIPID_OXIDATION	101	-0.720235	-1.74254	0.00203666	0.814556	0.871	2564	tags=56%, list=13%, signal=65%
GO_TRIGLYCERIDE_METABOLIC_PROCESS	97	-0.685016	-1.61529	0.0121457	0.663701	0.995	1816	tags=41%, list=9%, signal=45%
GO_POSITIVE_REGULATION_OF_PEPTIDE_HORMONE_SECRETION	97	-0.412468	-1.3499	0.0267176	0.592847	1	2986	tags=31%, list=15%, signal=36%
GO_POSITIVE_REGULATION_OF_COLD_INDUCED_THERMOGENESIS	97	-0.49021	-1.4881	0.0293542	0.522117	1	3003	tags=32%, list=15%, signal=38%
GO_RESPONSE_TO_CAMP	96	-0.603763	-1.6824	0	0.640775	0.967	1400	tags=31%, list=7%, signal=33%
GO_REGULATION_OF_LIPASE_ACTIVITY	96	-0.545373	-1.45873	0.0372549	0.555799	1	3188	tags=41%, list=16%, signal=48%
GO_MONOSACCHARIDE_BIOSYNTHETIC_PROCESS	96	-0.532591	-1.49724	0.0484848	0.534866	1	1875	tags=32%, list=10%, signal=36%
GO_FATTY_ACID_TRANSPORT	95	-0.501176	-1.43657	0.0273438	0.542784	1	2517	tags=34%, list=13%, signal=38%
GO_REGULATION_OF_CARBOHYDRATE_BIOSYNTHETIC_PROCESS	94	-0.522357	-1.73669	0	0.786842	0.891	2490	tags=31%, list=13%, signal=35%
GO_REGULATION_OF_SYSTEMIC_ARTERIAL_BLOOD_PRESSURE	93	-0.489363	-1.38669	0.038	0.560326	1	3595	tags=42%, list=18%, signal=51%
GO_NEGATIVE_REGULATION_OF_SMALL_MOLECULE_METABOLIC_PROCESS	92	-0.500774	-1.46705	0.0160643	0.574282	1	2575	tags=35%, list=13%, signal=40%
GO_STEROL_TRANSPORT	86	-0.56656	-1.55265	0.0139721	0.61295	1	1842	tags=34%, list=9%, signal=37%
GO_REGULATION_OF_FATTY_ACID_METABOLIC_PROCESS	86	-0.554653	-1.5404	0.0141414	0.569315	1	1875	tags=35%, list=10%, signal=38%
GO_MUSCLE_HYPERTROPHY	86	-0.439516	-1.42542	0.0419162	0.54624	1	2221	tags=28%, list=11%, signal=31%
GO_ENERGY_RESERVE_METABOLIC_PROCESS	85	-0.585864	-1.78658	0	1	0.728	2260	tags=35%, list=12%, signal=40%
GO_REGULATION_OF_PLASMA_LIPOPROTEIN_PARTICLE_LEVELS	84	-0.570491	-1.48427	0.0408998	0.531639	1	2155	tags=35%, list=11%, signal=39%
GO_STEROL_HOMEOSTASIS	83	-0.663476	-1.60752	0.0141414	0.667545	0.996	2246	tags=46%, list=11%, signal=51%
GO_CELLULAR_CARBOHYDRATE_BIOSYNTHETIC_PROCESS	82	-0.453097	-1.49376	0.00954198	0.524858	1	2924	tags=29%, list=15%, signal=34%
GO_POSITIVE_REGULATION_OF_LIPID_BIOSYNTHETIC_PROCESS	80	-0.547383	-1.58245	0.00793651	0.656407	0.998	3062	tags=36%, list=16%, signal=43%
GO_PEROXISOME_ORGANIZATION	80	-0.687305	-1.69228	0.0211946	0.632718	0.958	2564	tags=49%, list=13%, signal=56%
GO_POSITIVE_REGULATION_OF_CARBOHYDRATE_METABOLIC_PROCESS	78	-0.487258	-1.53138	0.00391389	0.542208	1	2390	tags=32%, list=12%, signal=36%
GO_RESPONSE_TO_ANESTHETIC	75	-0.447372	-1.44895	0.0214425	0.545026	1	1619	tags=21%, list=8%, signal=23%
GO_CELLULAR_GLUCAN_METABOLIC_PROCESS	73	-0.603693	-1.74902	0	0.854737	0.854	2924	tags=42%, list=15%, signal=50%
GO_ORGANIC_HYDROXY_COMPOUND_CATABOLIC_PROCESS	73	-0.562458	-1.43921	0.0421687	0.549597	1	2367	tags=38%, list=12%, signal=43%
GO_POSITIVE_REGULATION_OF_LIPASE_ACTIVITY	72	-0.579162	-1.52234	0.0254403	0.544356	1	2965	tags=39%, list=15%, signal=46%
GO_DEMETHYLATION	71	-0.557913	-1.66467	0.00626305	0.585068	0.983	2266	tags=25%, list=12%, signal=29%
GO_FATTY_ACID_BETA_OXIDATION	71	-0.716847	-1.75358	0.00785855	0.931071	0.839	2564	tags=58%, list=13%, signal=66%
GO_REGULATION_OF_HUMORAL_IMMUNE_RESPONSE	71	-0.660369	-1.47742	0.0461847	0.546584	1	2317	tags=48%, list=12%, signal=54%
GO_PEROXISOMAL_TRANSPORT	70	-0.703974	-1.68425	0.0174757	0.657419	0.966	2564	tags=51%, list=13%, signal=59%
GO_REGULATION_OF_CELLULAR_RESPONSE_TO_INSULIN_STIMULUS	69	-0.426391	-1.39965	0.037037	0.550088	1	1826	tags=20%, list=9%, signal=22%
GO_POSITIVE_REGULATION_OF_RESPONSE_TO_WOUNDING	68	-0.565101	-1.49552	0.0179283	0.535085	1	2535	tags=43%, list=13%, signal=49%
GO_COMPLEMENT_ACTIVATION	68	-0.756809	-1.55853	0.0219561	0.628331	1	2317	tags=60%, list=12%, signal=68%
GO_CELLULAR_RESPONSE_TO_CORTICOSTEROID_STIMULUS	62	-0.538264	-1.62231	0.00417537	0.651182	0.993	2910	tags=40%, list=15%, signal=47%
GO_CELLULAR_ALDEHYDE_METABOLIC_PROCESS	62	-0.614262	-1.52935	0.0318725	0.536843	1	3006	tags=48%, list=15%, signal=57%
GO_CIRCADIAN_REGULATION_OF_GENE_EXPRESSION	62	-0.487712	-1.50685	0.0383065	0.528382	1	2037	tags=29%, list=10%, signal=32%
GO_POSITIVE_REGULATION_OF_WOUND_HEALING	58	-0.595849	-1.50634	0.024	0.526675	1	1827	tags=40%, list=9%, signal=44%
GO_ENDOTHELIAL_CELL_DEVELOPMENT	58	-0.520302	-1.52146	0.0396226	0.534818	1	2544	tags=36%, list=13%, signal=41%
GO_REGULATION_OF_VASOCONSTRICTION	58	-0.559792	-1.45117	0.049904	0.550015	1	4158	tags=53%, list=21%, signal=68%
GO_POSITIVE_REGULATION_OF_CELLULAR_CARBOHYDRATE_METABOLIC_PROCESS	57	-0.584951	-1.72304	0	0.758357	0.913	1881	tags=33%, list=10%, signal=37%
GO_REGULATION_OF_LIPID_CATABOLIC_PROCESS	55	-0.607509	-1.5294	0.029703	0.541337	1	2086	tags=44%, list=11%, signal=49%
GO_CELLULAR_BIOGENIC_AMINE_METABOLIC_PROCESS	54	-0.604611	-1.51851	0.0301205	0.53017	1	1914	tags=41%, list=10%, signal=45%
GO_CATECHOLAMINE_METABOLIC_PROCESS	53	-0.59567	-1.59143	0.0116959	0.673204	0.998	1876	tags=34%, list=10%, signal=37%
GO_CELLULAR_RESPONSE_TO_CAMP	52	-0.632153	-1.67619	0.00198413	0.602372	0.976	1400	tags=31%, list=7%, signal=33%
GO_SODIUM_ION_HOMEOSTASIS	52	-0.505422	-1.40648	0.0230326	0.559033	1	1422	tags=27%, list=7%, signal=29%
GO_OXIDOREDUCTION_COENZYME_METABOLIC_PROCESS	52	-0.592347	-1.5122	0.0417495	0.524605	1	3807	tags=48%, list=19%, signal=60%
GO_ARACHIDONIC_ACID_METABOLIC_PROCESS	51	-0.64497	-1.44163	0.0439122	0.545032	1	1805	tags=41%, list=9%, signal=45%
GO_REGULATION_OF_SYSTEMIC_ARTERIAL_BLOOD_PRESSURE_MEDIATED_BY_A_CHEMICAL_SIGNAL	50	-0.588557	-1.47238	0.0362173	0.558104	1	2051	tags=38%, list=10%, signal=42%
GO_PROTEIN_LIPID_COMPLEX_SUBUNIT_ORGANIZATION	49	-0.662876	-1.4955	0.0406504	0.531601	1	2155	tags=43%, list=11%, signal=48%
GO_NEGATIVE_REGULATION_OF_CARBOHYDRATE_METABOLIC_PROCESS	49	-0.480365	-1.42044	0.0470588	0.556167	1	1561	tags=22%, list=8%, signal=24%
GO_RESPONSE_TO_COLD	48	-0.484297	-1.43251	0.0314961	0.53547	1	2534	tags=31%, list=13%, signal=36%
GO_STRIATED_MUSCLE_ADAPTATION	47	-0.518974	-1.63517	0.00207039	0.636255	0.991	2381	tags=34%, list=12%, signal=39%
GO_NEGATIVE_REGULATION_OF_SMOOTH_MUSCLE_CELL_PROLIFERATION	46	-0.641288	-1.63491	0.00784314	0.620833	0.991	2536	tags=39%, list=13%, signal=45%
GO_BILE_ACID_METABOLIC_PROCESS	46	-0.710074	-1.60005	0.0102249	0.685401	0.998	2246	tags=48%, list=11%, signal=54%
GO_REGULATION_OF_GLUCONEOGENESIS	46	-0.56776	-1.59715	0.0141414	0.663448	0.998	1875	tags=28%, list=10%, signal=31%
GO_GLYCOGEN_BIOSYNTHETIC_PROCESS	45	-0.641075	-1.80389	0.00200803	1	0.654	2924	tags=42%, list=15%, signal=50%
GO_ACTIVIN_RECEPTOR_SIGNALING_PATHWAY	43	-0.540874	-1.55467	0.020284	0.616812	1	2527	tags=35%, list=13%, signal=40%
GO_ESTABLISHMENT_OF_ENDOTHELIAL_BARRIER	43	-0.546673	-1.50306	0.039924	0.528811	1	2449	tags=37%, list=12%, signal=42%
GO_REGULATION_OF_POLYSACCHARIDE_METABOLIC_PROCESS	42	-0.531857	-1.59011	0.00788955	0.668542	0.998	2461	tags=36%, list=13%, signal=41%
GO_CYTOLYSIS	41	-0.650381	-1.43781	0.0423387	0.545428	1	2571	tags=44%, list=13%, signal=50%
GO_BROWN_FAT_CELL_DIFFERENTIATION	40	-0.610365	-1.62039	0.00584795	0.646902	0.993	1521	tags=28%, list=8%, signal=30%
GO_AROMATIC_AMINO_ACID_FAMILY_METABOLIC_PROCESS	40	-0.731866	-1.51726	0.0143443	0.531231	1	994	tags=50%, list=5%, signal=53%
GO_REGULATION_OF_SYSTEMIC_ARTERIAL_BLOOD_PRESSURE_BY_HORMONE	40	-0.575802	-1.45845	0.0364372	0.551058	1	2862	tags=43%, list=15%, signal=50%
GO_PYRIDINE_CONTAINING_COMPOUND_METABOLIC_PROCESS	40	-0.635761	-1.5004	0.0427699	0.536403	1	4299	tags=58%, list=22%, signal=74%
GO_DOPAMINE_METABOLIC_PROCESS	39	-0.569387	-1.54722	0.0231214	0.585184	1	1782	tags=28%, list=9%, signal=31%
GO_NEUTRAL_LIPID_BIOSYNTHETIC_PROCESS	38	-0.743046	-1.62259	0.00609756	0.666238	0.993	1651	tags=45%, list=8%, signal=49%
GO_POSITIVE_REGULATION_OF_GLUCOSE_METABOLIC_PROCESS	37	-0.660911	-1.73654	0.00201207	0.716322	0.891	2260	tags=46%, list=12%, signal=52%
GO_RESPONSE_TO_GLUCAGON	37	-0.644239	-1.5743	0.00392157	0.672068	0.999	1613	tags=32%, list=8%, signal=35%
GO_RENAL_WATER_HOMEOSTASIS	36	-0.565003	-1.5219	0.0246212	0.537281	1	4529	tags=44%, list=23%, signal=58%
GO_CELLULAR_RESPONSE_TO_ESTRADIOL_STIMULUS	36	-0.541402	-1.46639	0.0323887	0.570357	1	2559	tags=33%, list=13%, signal=38%
GO_REGULATION_OF_TRIGLYCERIDE_METABOLIC_PROCESS	36	-0.718778	-1.56947	0.0344828	0.679384	1	3017	tags=56%, list=15%, signal=66%
GO_BILE_ACID_BIOSYNTHETIC_PROCESS	35	-0.751477	-1.59759	0.00808081	0.674008	0.998	2000	tags=54%, list=10%, signal=60%
GO_INSULIN_LIKE_GROWTH_FACTOR_RECEPTOR_SIGNALING_PATHWAY	35	-0.587923	-1.54369	0.0159681	0.58989	1	1659	tags=31%, list=8%, signal=34%
GO_REGULATION_OF_GLYCOGEN_METABOLIC_PROCESS	34	-0.613194	-1.67278	0.0020284	0.577588	0.977	2461	tags=41%, list=13%, signal=47%
GO_POSITIVE_REGULATION_OF_FATTY_ACID_METABOLIC_PROCESS	34	-0.680271	-1.5798	0.0182927	0.661116	0.998	1816	tags=44%, list=9%, signal=49%
GO_ACYLGLYCEROL_HOMEOSTASIS	34	-0.752481	-1.53364	0.0204918	0.542143	1	2155	tags=62%, list=11%, signal=69%
GO_PROTEIN_ADP_RIBOSYLATION	34	-0.464809	-1.56906	0.0220884	0.660886	1	4383	tags=47%, list=22%, signal=61%
GO_PYRIDINE_NUCLEOTIDE_METABOLIC_PROCESS	34	-0.656009	-1.5167	0.0221328	0.525184	1	4541	tags=62%, list=23%, signal=80%
GO_POSITIVE_REGULATION_OF_AMINE_TRANSPORT	34	-0.573866	-1.4351	0.0262626	0.541557	1	2812	tags=38%, list=14%, signal=45%
GO_ENERGY_HOMEOSTASIS	34	-0.530551	-1.44869	0.0356436	0.540754	1	2593	tags=35%, list=13%, signal=41%
GO_POSITIVE_REGULATION_OF_ORGANIC_ACID_TRANSPORT	34	-0.571498	-1.41536	0.0376984	0.5532	1	1242	tags=29%, list=6%, signal=31%
GO_REGULATION_OF_ENDOTHELIAL_CELL_DIFFERENTIATION	33	-0.6743	-1.6945	0.00190114	0.650652	0.955	2906	tags=42%, list=15%, signal=50%
GO_HEART_TRABECULA_MORPHOGENESIS	33	-0.61157	-1.56877	0.0436508	0.652281	1	2548	tags=39%, list=13%, signal=45%
GO_TRIGLYCERIDE_CATABOLIC_PROCESS	33	-0.686066	-1.45278	0.0476191	0.551754	1	2618	tags=55%, list=13%, signal=63%
GO_CELLULAR_RESPONSE_TO_DEXAMETHASONE_STIMULUS	32	-0.619858	-1.65534	0.0019802	0.566864	0.987	1520	tags=38%, list=8%, signal=41%
GO_POSITIVE_REGULATION_OF_VASOCONSTRICTION	32	-0.613626	-1.43068	0.0383065	0.540312	1	1502	tags=38%, list=8%, signal=41%
GO_REGULATION_OF_FATTY_ACID_OXIDATION	29	-0.749742	-1.78352	0	0.941024	0.74	1483	tags=55%, list=8%, signal=60%
GO_PROTEIN_CONTAINING_COMPLEX_REMODELING	29	-0.770638	-1.4982	0.0342052	0.53822	1	2155	tags=62%, list=11%, signal=70%
GO_BILE_ACID_AND_BILE_SALT_TRANSPORT	29	-0.741719	-1.49007	0.0362173	0.52376	1	2884	tags=62%, list=15%, signal=73%
GO_REGULATION_OF_GLUCAN_BIOSYNTHETIC_PROCESS	28	-0.682315	-1.83939	0	1	0.512	2876	tags=46%, list=15%, signal=54%
GO_CELLULAR_MODIFIED_AMINO_ACID_CATABOLIC_PROCESS	28	-0.732256	-1.58461	0.0119522	0.678153	0.998	940	tags=39%, list=5%, signal=41%
GO_POSITIVE_REGULATION_OF_COAGULATION	28	-0.71585	-1.55022	0.0184426	0.596559	1	1778	tags=50%, list=9%, signal=55%
GO_LONG_CHAIN_FATTY_ACID_BIOSYNTHETIC_PROCESS	27	-0.718743	-1.56714	0.0100604	0.642806	1	854	tags=33%, list=4%, signal=35%
GO_PROTEIN_ACTIVATION_CASCADE	27	-0.79654	-1.55998	0.0137525	0.646175	1	1079	tags=59%, list=6%, signal=63%
GO_RESPONSE_TO_DIETARY_EXCESS	27	-0.550243	-1.44062	0.0216963	0.546362	1	2462	tags=26%, list=13%, signal=30%
GO_POSITIVE_REGULATION_OF_STEROID_METABOLIC_PROCESS	27	-0.648997	-1.51138	0.026975	0.52436	1	2155	tags=33%, list=11%, signal=37%
GO_FIBRINOLYSIS	27	-0.740177	-1.53783	0.0301205	0.558605	1	1079	tags=56%, list=6%, signal=59%
GO_CELLULAR_RESPONSE_TO_GLUCAGON_STIMULUS	26	-0.671595	-1.53575	0.0117188	0.542408	1	1389	tags=31%, list=7%, signal=33%
GO_ONE_CARBON_METABOLIC_PROCESS	26	-0.621019	-1.56213	0.0141414	0.652536	1	669	tags=27%, list=3%, signal=28%
GO_REGULATION_OF_SYSTEMIC_ARTERIAL_BLOOD_PRESSURE_BY_RENIN_ANGIOTENSIN	26	-0.642035	-1.45864	0.033195	0.55331	1	3258	tags=54%, list=17%, signal=64%
GO_ENTRAINMENT_OF_CIRCADIAN_CLOCK	26	-0.531548	-1.5401	0.0455487	0.564946	1	3939	tags=50%, list=20%, signal=62%
GO_NEGATIVE_REGULATION_OF_ATP_METABOLIC_PROCESS	25	-0.626786	-1.60661	0.00784314	0.658179	0.996	1284	tags=28%, list=7%, signal=30%
GO_CELLULAR_RESPONSE_TO_GROWTH_HORMONE_STIMULUS	25	-0.573606	-1.70907	0.0114286	0.703402	0.936	592	tags=12%, list=3%, signal=12%
GO_RENAL_SYSTEM_PROCESS_INVOLVED_IN_REGULATION_OF_SYSTEMIC_ARTERIAL_BLOOD_PRESSURE	25	-0.601193	-1.41731	0.0313808	0.550282	1	2293	tags=44%, list=12%, signal=50%
GO_TRABECULA_FORMATION	25	-0.622707	-1.44586	0.0469667	0.541363	1	2911	tags=44%, list=15%, signal=52%
GO_BENZENE_CONTAINING_COMPOUND_METABOLIC_PROCESS	25	-0.728855	-1.4646	0.0471513	0.562016	1	2559	tags=60%, list=13%, signal=69%
GO_INDOLE_CONTAINING_COMPOUND_METABOLIC_PROCESS	24	-0.714198	-1.55717	0.0100604	0.619594	1	1782	tags=42%, list=9%, signal=46%
GO_TOXIN_METABOLIC_PROCESS	24	-0.722432	-1.5348	0.012605	0.541923	1	1782	tags=46%, list=9%, signal=50%
GO_REGULATION_OF_ESTABLISHMENT_OR_MAINTENANCE_OF_CELL_POLARITY	24	-0.58338	-1.55896	0.0283976	0.642863	1	1821	tags=29%, list=9%, signal=32%
GO_PHOTOPERIODISM	24	-0.552767	-1.58436	0.0306748	0.667441	0.998	3939	tags=46%, list=20%, signal=57%
GO_RESPONSE_TO_LITHIUM_ION	23	-0.696502	-1.67665	0.00396825	0.624485	0.976	2568	tags=48%, list=13%, signal=55%
GO_REGULATION_OF_INSULIN_LIKE_GROWTH_FACTOR_RECEPTOR_SIGNALING_PATHWAY	23	-0.645373	-1.52942	0.0234375	0.546102	1	1659	tags=35%, list=8%, signal=38%
GO_NEGATIVE_REGULATION_OF_LIPID_CATABOLIC_PROCESS	23	-0.610092	-1.45958	0.0288462	0.558203	1	2086	tags=43%, list=11%, signal=49%
GO_MALE_GENITALIA_DEVELOPMENT	23	-0.613903	-1.48878	0.0333952	0.522786	1	2906	tags=39%, list=15%, signal=46%
GO_ALDITOL_METABOLIC_PROCESS	23	-0.67853	-1.4643	0.0430328	0.560183	1	1021	tags=35%, list=5%, signal=37%
GO_POSITIVE_REGULATION_OF_STEROL_TRANSPORT	23	-0.584616	-1.47629	0.0483871	0.547876	1	2155	tags=35%, list=11%, signal=39%
GO_EXOGENOUS_DRUG_CATABOLIC_PROCESS	22	-0.847861	-1.51864	0.00982318	0.533949	1	786	tags=59%, list=4%, signal=61%
GO_MUSCLE_HYPERTROPHY_IN_RESPONSE_TO_STRESS	22	-0.552896	-1.5496	0.0164271	0.585743	1	2221	tags=41%, list=11%, signal=46%
GO_AMINE_CATABOLIC_PROCESS	22	-0.767064	-1.4961	0.0179641	0.536222	1	1914	tags=68%, list=10%, signal=75%
GO_REGULATION_OF_LIPOPROTEIN_LIPASE_ACTIVITY	22	-0.766776	-1.5253	0.0309478	0.541211	1	1100	tags=50%, list=6%, signal=53%
GO_ETHANOL_METABOLIC_PROCESS	22	-0.752193	-1.45758	0.0367347	0.548993	1	2442	tags=64%, list=12%, signal=73%
GO_NEUROTRANSMITTER_CATABOLIC_PROCESS	21	-0.788121	-1.65244	0.00984252	0.565155	0.987	2324	tags=62%, list=12%, signal=70%
GO_CATECHOLAMINE_BIOSYNTHETIC_PROCESS	20	-0.700439	-1.54258	0.015444	0.56443	1	2306	tags=50%, list=12%, signal=57%
GO_ENTRAINMENT_OF_CIRCADIAN_CLOCK_BY_PHOTOPERIOD	20	-0.62592	-1.66412	0.0258964	0.568912	0.983	3939	tags=50%, list=20%, signal=63%
GO_NEGATIVE_REGULATION_OF_NUCLEOTIDE_METABOLIC_PROCESS	20	-0.657389	-1.51221	0.0281125	0.52854	1	1284	tags=30%, list=7%, signal=32%
GO_DEFINITIVE_HEMOPOIESIS	20	-0.612837	-1.54336	0.0353635	0.585133	1	2298	tags=30%, list=12%, signal=34%
GO_OXIDATIVE_DEMETHYLATION	19	-0.833364	-1.66691	0.00204918	0.591829	0.982	405	tags=42%, list=2%, signal=43%
GO_EPOXYGENASE_P450_PATHWAY	19	-0.90415	-1.52714	0.00978474	0.537176	1	853	tags=79%, list=4%, signal=82%
GO_REGULATION_OF_SYSTEMIC_ARTERIAL_BLOOD_PRESSURE_BY_CIRCULATORY_RENIN_ANGIOTENSIN	19	-0.720768	-1.51685	0.0323232	0.528603	1	3258	tags=63%, list=17%, signal=76%
GO_WATER_TRANSPORT	19	-0.654948	-1.43465	0.046332	0.540985	1	1810	tags=42%, list=9%, signal=46%
GO_POSITIVE_REGULATION_OF_TRANSCRIPTION_INITIATION_FROM_RNA_POLYMERASE_II_PROMOTER	19	-0.491688	-1.48362	0.0492813	0.527961	1	8	tags=5%, list=0%, signal=5%
GO_REGULATION_OF_FATTY_ACID_BETA_OXIDATION	18	-0.703435	-1.69834	0.0116732	0.740282	0.949	1483	tags=56%, list=8%, signal=60%
GO_POSITIVE_REGULATION_OF_AMINO_ACID_TRANSPORT	18	-0.721234	-1.55892	0.0122951	0.634437	1	561	tags=33%, list=3%, signal=34%
GO_BLOOD_COAGULATION_INTRINSIC_PATHWAY	18	-0.850292	-1.51595	0.0136986	0.52435	1	955	tags=61%, list=5%, signal=64%
GO_REGULATION_OF_CYTOLYSIS	18	-0.696107	-1.45588	0.0353635	0.547353	1	473	tags=28%, list=2%, signal=28%
GO_ARGININE_METABOLIC_PROCESS	18	-0.718504	-1.46184	0.0422535	0.557933	1	2502	tags=61%, list=13%, signal=70%
GO_POSITIVE_REGULATION_OF_STEROID_BIOSYNTHETIC_PROCESS	18	-0.589536	-1.40069	0.045283	0.549997	1	1098	tags=17%, list=6%, signal=18%
GO_POSITIVE_REGULATION_OF_RESPONSE_TO_OXIDATIVE_STRESS	18	-0.545679	-1.49463	0.0465587	0.528351	1	3323	tags=44%, list=17%, signal=53%
GO_REGULATION_OF_TRIGLYCERIDE_BIOSYNTHETIC_PROCESS	17	-0.796276	-1.71438	0	0.765676	0.927	1605	tags=47%, list=8%, signal=51%
GO_POSITIVE_REGULATION_OF_GLYCOGEN_METABOLIC_PROCESS	17	-0.733043	-1.68078	0.00199203	0.623417	0.97	2876	tags=59%, list=15%, signal=69%
GO_AMINO_ACID_BETAINE_METABOLIC_PROCESS	17	-0.821984	-1.59243	0.00795229	0.680252	0.998	2444	tags=76%, list=12%, signal=87%
GO_MYOBLAST_PROLIFERATION	17	-0.636812	-1.55597	0.0155945	0.617806	1	4136	tags=47%, list=21%, signal=60%
GO_POSITIVE_REGULATION_OF_ENDOTHELIAL_CELL_DIFFERENTIATION	17	-0.720441	-1.57093	0.0157791	0.681714	1	2906	tags=53%, list=15%, signal=62%
GO_SHORT_CHAIN_FATTY_ACID_METABOLIC_PROCESS	17	-0.782932	-1.54888	0.0242424	0.583097	1	2442	tags=76%, list=12%, signal=87%
GO_INDOLALKYLAMINE_METABOLIC_PROCESS	17	-0.762837	-1.48076	0.0265306	0.536103	1	540	tags=41%, list=3%, signal=42%
GO_SULFUR_AMINO_ACID_BIOSYNTHETIC_PROCESS	17	-0.763723	-1.51329	0.0328542	0.528221	1	1384	tags=47%, list=7%, signal=51%
GO_MITOTIC_CELL_CYCLE_ARREST	17	-0.584905	-1.48382	0.0482625	0.530363	1	2337	tags=35%, list=12%, signal=40%
GO_REGULATION_OF_ER_TO_GOLGI_VESICLE_MEDIATED_TRANSPORT	16	-0.702817	-1.82797	0.0020202	1	0.568	1906	tags=38%, list=10%, signal=42%
GO_METHIONINE_METABOLIC_PROCESS	16	-0.771733	-1.584	0.0165289	0.657975	0.998	1197	tags=44%, list=6%, signal=47%
GO_S_ADENOSYLMETHIONINE_METABOLIC_PROCESS	16	-0.640277	-1.53944	0.0399202	0.562155	1	1197	tags=25%, list=6%, signal=27%
GO_AMMONIUM_TRANSMEMBRANE_TRANSPORT	16	-0.647207	-1.44559	0.0473485	0.540008	1	2244	tags=38%, list=11%, signal=42%
GO_REVERSE_CHOLESTEROL_TRANSPORT	16	-0.810092	-1.44201	0.0496894	0.546192	1	2155	tags=75%, list=11%, signal=84%
GO_BEHAVIORAL_RESPONSE_TO_ETHANOL	15	-0.708371	-1.64211	0.0193424	0.60801	0.989	171	tags=13%, list=1%, signal=13%
GO_SULFUR_AMINO_ACID_CATABOLIC_PROCESS	15	-0.752775	-1.54327	0.0238569	0.579331	1	1655	tags=53%, list=8%, signal=58%
GO_LOCOMOTOR_RHYTHM	15	-0.579999	-1.48883	0.0378486	0.525862	1	2517	tags=40%, list=13%, signal=46%
GO_RESPONSE_TO_POTASSIUM_ION	15	-0.651945	-1.48649	0.038835	0.525459	1	2350	tags=40%, list=12%, signal=45%
GO_FATTY_ACID_BETA_OXIDATION_USING_ACYL_COA_OXIDASE	15	-0.76638	-1.50341	0.0442656	0.531061	1	2564	tags=73%, list=13%, signal=84%
GO_SEQUESTERING_OF_TRIGLYCERIDE	15	-0.676051	-1.53902	0.0469667	0.558548	1	3017	tags=53%, list=15%, signal=63%
GO_ETHER_METABOLIC_PROCESS	15	-0.633152	-1.50858	0.0484848	0.528558	1	1092	tags=27%, list=6%, signal=28%
Molecular function (50 terms)
GO_COFACTOR_BINDING	493	-0.558276	-1.65716	0.00996016	0.950555	0.849	2452	tags=38%, list=13%, signal=42%
GO_AMIDE_BINDING	343	-0.413959	-1.43115	0.00404858	0.456055	1	2534	tags=24%, list=13%, signal=28%
GO_COENZYME_BINDING	283	-0.603157	-1.68185	0.00814664	1	0.773	2482	tags=43%, list=13%, signal=49%
GO_SULFUR_COMPOUND_BINDING	252	-0.514262	-1.4529	0.0292969	0.460266	1	2281	tags=33%, list=12%, signal=37%
GO_ORGANIC_ACID_BINDING	205	-0.475178	-1.39719	0.0351967	0.475316	1	2566	tags=36%, list=13%, signal=41%
GO_LYASE_ACTIVITY	186	-0.480697	-1.4798	0.0388548	0.467371	0.999	2520	tags=35%, list=13%, signal=40%
GO_HORMONE_RECEPTOR_BINDING	186	-0.328486	-1.36893	0.044316	0.505399	1	2583	tags=18%, list=13%, signal=21%
GO_OXIDOREDUCTASE_ACTIVITY_ACTING_ON_PAIRED_DONORS_WITH_INCORPORATION_OR_REDUCTION_OF_MOLECULAR_OXYGEN	154	-0.604428	-1.58993	0.00408163	0.444355	0.97	2266	tags=39%, list=12%, signal=44%
GO_IRON_ION_BINDING	148	-0.602186	-1.63526	0.00409836	0.670759	0.907	1786	tags=36%, list=9%, signal=40%
GO_TETRAPYRROLE_BINDING	141	-0.603092	-1.57932	0.00811359	0.415202	0.982	2398	tags=42%, list=12%, signal=47%
GO_VITAMIN_BINDING	134	-0.591621	-1.58167	0.0181818	0.427913	0.98	2324	tags=40%, list=12%, signal=45%
GO_CARBOXYLIC_ESTER_HYDROLASE_ACTIVITY	127	-0.494136	-1.51833	0.0270833	0.412226	0.994	1683	tags=24%, list=9%, signal=26%
GO_LIPID_TRANSPORTER_ACTIVITY	123	-0.589398	-1.58281	0.0140281	0.44833	0.977	2494	tags=40%, list=13%, signal=45%
GO_HORMONE_BINDING	105	-0.506965	-1.52307	0.00622407	0.423744	0.994	2469	tags=31%, list=13%, signal=36%
GO_MONOOXYGENASE_ACTIVITY	95	-0.721985	-1.60366	0.00204918	0.525929	0.951	2194	tags=55%, list=11%, signal=61%
GO_STEROID_BINDING	94	-0.509152	-1.47497	0.00782779	0.462076	0.999	1704	tags=30%, list=9%, signal=32%
GO_FLAVIN_ADENINE_DINUCLEOTIDE_BINDING	79	-0.629157	-1.66317	0.00817996	1	0.827	2581	tags=43%, list=13%, signal=49%
GO_AMMONIUM_ION_BINDING	76	-0.420538	-1.35933	0.0465587	0.514424	1	1910	tags=20%, list=10%, signal=22%
GO_G_PROTEIN_COUPLED_AMINE_RECEPTOR_ACTIVITY	58	-0.52815	-1.52214	0.0306122	0.412588	0.994	1644	tags=14%, list=8%, signal=15%
GO_STEROID_HORMONE_RECEPTOR_ACTIVITY	56	-0.601834	-1.61037	0.00214133	0.59086	0.943	2256	tags=36%, list=12%, signal=40%
GO_NEUROTRANSMITTER_BINDING	56	-0.505948	-1.46368	0.00625	0.444873	1	906	tags=20%, list=5%, signal=21%
GO_AMINO_ACID_BINDING	56	-0.672573	-1.63366	0.0107296	0.59688	0.91	3166	tags=55%, list=16%, signal=66%
GO_MONOCARBOXYLIC_ACID_TRANSMEMBRANE_TRANSPORTER_ACTIVITY	56	-0.64304	-1.47898	0.0167364	0.457757	0.999	2135	tags=46%, list=11%, signal=52%
GO_NAD_BINDING	55	-0.585221	-1.63091	0.0160321	0.543489	0.916	2400	tags=42%, list=12%, signal=48%
GO_PEPTIDE_HORMONE_BINDING	52	-0.552516	-1.43456	0.0306122	0.454242	1	2469	tags=35%, list=13%, signal=39%
GO_VITAMIN_B6_BINDING	51	-0.736417	-1.60202	0.00409836	0.492209	0.952	2324	tags=59%, list=12%, signal=67%
GO_LIGAND_ACTIVATED_TRANSCRIPTION_FACTOR_ACTIVITY	47	-0.589227	-1.53307	0.0210084	0.417923	0.993	2256	tags=32%, list=12%, signal=36%
GO_OXIDOREDUCTASE_ACTIVITY_ACTING_ON_PAIRED_DONORS_WITH_INCORPORATION_OR_REDUCTION_OF_MOLECULAR_OXYGEN_NAD_P_H_AS_ONE_DONOR_AND_INCORPORATION_OF_ONE_ATOM_OF_OXYGEN	38	-0.73198	-1.50313	0.0243902	0.44988	0.996	2191	tags=66%, list=11%, signal=74%
GO_STEROID_HYDROXYLASE_ACTIVITY	36	-0.821502	-1.55251	0.0105485	0.414001	0.989	1147	tags=67%, list=6%, signal=71%
GO_OXYGEN_BINDING	36	-0.707272	-1.56607	0.012766	0.420193	0.986	1154	tags=42%, list=6%, signal=44%
GO_OXIDOREDUCTASE_ACTIVITY_ACTING_ON_PAIRED_DONORS_WITH_INCORPORATION_OR_REDUCTION_OF_MOLECULAR_OXYGEN_REDUCED_FLAVIN_OR_FLAVOPROTEIN_AS_ONE_DONOR_AND_INCORPORATION_OF_ONE_ATOM_OF_OXYGEN	34	-0.822317	-1.5605	0.00201207	0.421132	0.987	853	tags=62%, list=4%, signal=64%
GO_FAD_BINDING	32	-0.670372	-1.54601	0.0184805	0.402423	0.99	2191	tags=44%, list=11%, signal=49%
GO_HISTONE_ACETYLTRANSFERASE_BINDING	29	-0.586225	-1.64314	0.0137525	0.721621	0.884	3495	tags=38%, list=18%, signal=46%
GO_AROMATASE_ACTIVITY	26	-0.844391	-1.52875	0.0083682	0.41909	0.993	853	tags=65%, list=4%, signal=68%
GO_POLYSACCHARIDE_BINDING	26	-0.626601	-1.48876	0.00867679	0.448881	0.999	2461	tags=46%, list=13%, signal=53%
GO_TRANSFERASE_ACTIVITY_TRANSFERRING_NITROGENOUS_GROUPS	23	-0.738555	-1.50287	0.032	0.437419	0.996	1803	tags=57%, list=9%, signal=62%
GO_FATTY_ACID_LIGASE_ACTIVITY	22	-0.744703	-1.46409	0.0476191	0.453836	1	1318	tags=50%, list=7%, signal=54%
GO_FATTY_ACYL_COA_BINDING	21	-0.696667	-1.57513	0.0251046	0.408941	0.983	2534	tags=52%, list=13%, signal=60%
GO_COA_HYDROLASE_ACTIVITY	21	-0.669393	-1.53551	0.0497925	0.425383	0.993	1515	tags=48%, list=8%, signal=52%
GO_TRIGLYCERIDE_LIPASE_ACTIVITY	20	-0.753796	-1.60559	0.0122699	0.564067	0.949	3017	tags=55%, list=15%, signal=65%
GO_C_ACYLTRANSFERASE_ACTIVITY	20	-0.755536	-1.55599	0.0163599	0.419282	0.989	1487	tags=50%, list=8%, signal=54%
GO_CATECHOLAMINE_BINDING	20	-0.64124	-1.41536	0.0491803	0.44991	1	2334	tags=30%, list=12%, signal=34%
GO_ADRENERGIC_RECEPTOR_ACTIVITY	19	-0.80022	-1.59625	0.0121457	0.481073	0.965	965	tags=32%, list=5%, signal=33%
GO_BILE_ACID_TRANSMEMBRANE_TRANSPORTER_ACTIVITY	19	-0.741915	-1.44706	0.0419287	0.468997	1	2403	tags=58%, list=12%, signal=66%
GO_TRANSMEMBRANE_RECEPTOR_PROTEIN_SERINE_THREONINE_KINASE_ACTIVITY	17	-0.600699	-1.49622	0.0479042	0.448244	0.999	2527	tags=35%, list=13%, signal=40%
GO_INSULIN_LIKE_GROWTH_FACTOR_RECEPTOR_BINDING	16	-0.747238	-1.78338	0.0020202	1	0.413	1881	tags=44%, list=10%, signal=48%
GO_ARACHIDONIC_ACID_MONOOXYGENASE_ACTIVITY	16	-0.899165	-1.47173	0.0162272	0.450418	1	853	tags=81%, list=4%, signal=85%
GO_FMN_BINDING	15	-0.78671	-1.59391	0.00402414	0.458754	0.966	2059	tags=60%, list=11%, signal=67%
GO_TRANSCRIPTION_COREPRESSOR_BINDING	15	-0.609491	-1.65421	0.0220441	0.78066	0.855	2881	tags=33%, list=15%, signal=39%
GO_ACTIVIN_BINDING	15	-0.635572	-1.5498	0.0257511	0.406502	0.99	2527	tags=47%, list=13%, signal=54%
